# Supplementary material for: Phytohormone and Transcriptomic Analysis Reveals Endogenous Cytokinins Affect Kiwifruit Growth under Restricted Carbon Supply
Source: MDPI journal article supplement (doi:10.3390/metabo10010023), 2020-01-04
Supplement: s1 [file s1]

## Supplementary Figures

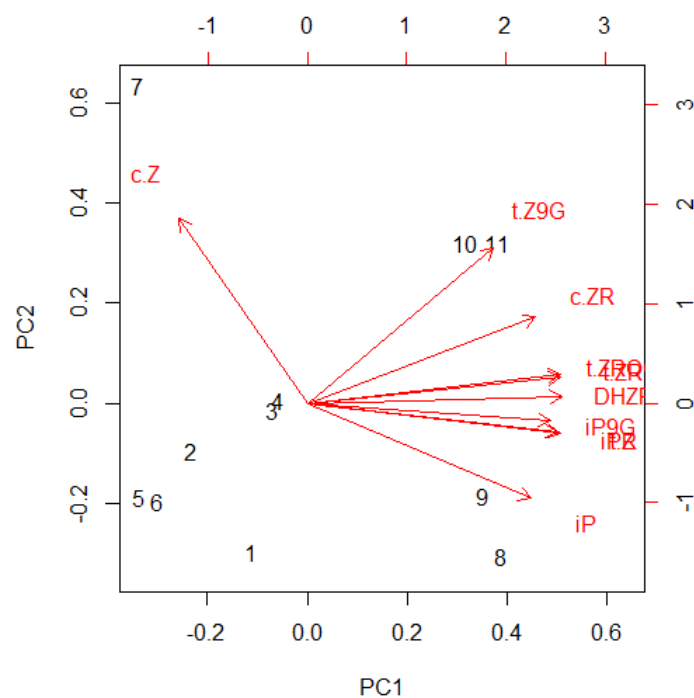

**Figure S1:** Cytokinin biplot at 16 weeks after mid bloom. Numbers 1-3 are low carbohydrate supply kiwifruit, numbers 4-7 are untreated control fruit, and numbers 8-11 are high carbohydrate supply fruit.

| Gene name                                    | Gene model | Expression level<br>(base mean) | Log2 fold-change |      |      |
|----------------------------------------------|------------|---------------------------------|------------------|------|------|
|                                              |            |                                 | Fruit age (WAMB) |      |      |
|                                              |            |                                 | 8                | 12   | 16   |
| Histidine kinase                             |            |                                 |                  |      |      |
| AHK2.1                                       | Acc14922.1 | 419.3                           | 0.2              | 0.3  | 1.0  |
| AHK3.1                                       | Acc11804.1 | 47.0                            | 0.2              | -0.3 | 0.3  |
| AHK3.2                                       | Acc11805.1 | 140.9                           | 0.0              | -0.1 | 0.4  |
| AHK3.3                                       | Acc14294.1 | 676.8                           | 0.1              | 0.2  | 0.3  |
| AHK3.4                                       | Acc32738.1 | 690.1                           | 0.1              | 0.4  | 0.3  |
| AHK3.5                                       | Acc06165.1 | 533.3                           | 0.1              | 0.4  | 0.9  |
| AHK4.1                                       | Acc28323.1 | 65.7                            | 0.2              | -0.1 | 0.3  |
| AHK4.2                                       | Acc08110.1 | 59.1                            | 0.0              | 0.3  | 0.7  |
| AHK4.3                                       | Acc08111.1 | 34.9                            | 0.1              | -0.6 | 0.7  |
| Histidine-containing phosphotransfer protein |            |                                 |                  |      |      |
| AHP1.1                                       | Acc15213.1 | 104.9                           | -0.2             | 0.1  | -0.2 |
| AHP1.2                                       | Acc17231.1 | 185.4                           | 0.1              | 0.9  | 0.1  |
| AHP1.3                                       | Acc19586.1 | 41.2                            | 0.0              | -0.1 | -0.4 |
| AHP1.4                                       | Acc27271.1 | 93.1                            | -0.1             | 0.0  | -0.3 |
| AHP1.5                                       | Acc31641.1 | 64.7                            | -0.1             | 0.0  | -0.1 |
| AHP1.6                                       | Acc04324.1 | 39.2                            | -0.1             | 0.2  | 0.3  |
| AHP1.7                                       | Acc09459.1 | 252.2                           | -0.1             | 1.5  | 2.3  |
| AHP4.1                                       | Acc12680.1 | 0.8                             | 0.7              | 0.6  | 0.3  |
| AHP4.2                                       | Acc17743.1 | 0.5                             | -1.0             | 0.2  | -0.8 |
| AHP4.3                                       | Acc28626.1 | 12.5                            | 0.2              | 0.8  | 0.4  |

Log2 fold-change

-5      0      5

**Figure S2:** Heat-map of kiwifruit multistep phosphorelay (MSP) pathway genes: cytokinin receptors histidine kinases (AHK) and positive regulators histidine-containing phosphotransfer proteins (AHP). DESeq comparison of low carbohydrate supply versus high carbohydrate supply treatments. For each gene, the expression level (base mean) and the log2 fold-change are presented. Fruit age is in weeks after mid bloom (WAMB). Bold figures mean differences are significant for adjusted  $p < 0.05$ .

| Gene name  | Gene model | Expression level<br>(base mean) | Log2 fold-change |      |      |
|------------|------------|---------------------------------|------------------|------|------|
|            |            |                                 | Fruit age (WAMB) |      |      |
|            |            |                                 | 8                | 12   | 16   |
| Type-A ARR |            |                                 |                  |      |      |
| ARR3.1     | Acc17017.1 | 1.3                             | 0.4              | -1.6 | -1.2 |
| ARR4.1     | Acc06265.1 | 112.5                           | -0.1             | -1.2 | -0.5 |
| ARR6.1     | Acc18177.1 | 126.1                           | 0.2              | -0.7 | -0.2 |
| ARR6.2     | Acc29817.1 | 6.0                             | 0.6              | -1.6 | -1.7 |
| ARR9.1     | Acc13210.1 | 13.7                            | 0.2              | -0.7 | 0.2  |
| ARR9.2     | Acc23103.1 | 78.7                            | 0.1              | -0.7 | -0.3 |
| ARR9.3     | Acc24383.1 | 0.7                             | -0.6             | -0.7 | -2.5 |
| ARR9.4     | Acc03913.1 | 1.0                             | -0.4             | -2.9 | -1.6 |
| ARR9.5     | Acc05075.1 | 6.9                             | 0.7              | -0.5 | -1.0 |
| ARR9.6     | Acc09239.1 | 0.3                             | -0.7             | 0.6  | -1.5 |
| ARR17.1    | Acc16581.1 | 0.0                             | -                | -    | -    |
| ARR17.2    | Acc02781.1 | 0.3                             | -0.8             | 0.6  | -0.1 |
| Type-B ARR |            |                                 |                  |      |      |
| ARR1.1     | Acc13982.1 | 87.2                            | 0.3              | -0.2 | 0.1  |
| ARR2.1     | Acc24578.1 | 84.3                            | -0.1             | -0.1 | 0.3  |
| ARR2.2     | Acc27152.1 | 242.5                           | 0.0              | -0.3 | -0.5 |
| ARR2.3     | Acc28375.1 | 498.6                           | 0.0              | -0.2 | 0.0  |
| ARR2.4     | Acc29737.1 | 5.0                             | -0.4             | -0.6 | 0.1  |
| ARR2.5     | Acc31143.1 | 223.9                           | 0.1              | 0.2  | 0.1  |
| ARR2.6     | Acc32853.1 | 117.4                           | 0.0              | 0.0  | 0.2  |
| ARR2.7     | Acc03501.1 | 96.6                            | -0.1             | 0.2  | 0.4  |
| ARR10.1    | Acc00754.1 | 12.2                            | 0.2              | 1.2  | 0.6  |
| ARR10.2    | Acc10062.1 | 0.7                             | 1.5              | -0.1 | 0.9  |
| ARR10.3    | Acc10115.1 | 0.4                             | -0.2             | 1.9  | 1.3  |
| ARR11.1    | Acc08222.1 | 11.4                            | 0.0              | 0.3  | 1.0  |
| ARR11.2    | Acc33711.1 | 28.3                            | -0.3             | 0.6  | 0.6  |
| ARR12.1    | Acc00691.1 | 6.8                             | 0.1              | 0.7  | 0.4  |
| ARR12.2    | Acc12420.1 | 45.2                            | -0.1             | 0.0  | -0.5 |
| ARR12.3    | Acc14541.1 | 78.0                            | 0.0              | 0.0  | 0.3  |
| ARR12.4    | Acc18510.1 | 8.8                             | -0.3             | -0.1 | 0.2  |
| ARR12.5    | Acc29214.1 | 116.0                           | 0.0              | 0.8  | 0.7  |
| ARR12.6    | Acc09091.1 | 14.0                            | 0.3              | 0.4  | 0.7  |

Log2 fold-change

-505

**Figure S3:** Heat-map of kiwifruit multistep phosphorelay (MSP) pathway genes: negative regulators A-type Arabidopsis Response Regulators (Type-A ARR) and positive regulators B-type ARR (Type-B ARR). DESeq comparison of low carbohydrate supply versus high carbohydrate supply treatments. For each gene, the expression level (base mean) and the log2 fold-change are presented. Fruit age is in weeks after mid bloom (WAMB). Bold figures mean differences are significant for adjusted  $p < 0.05$ .

| Gene name                   | Gene model | Expression level<br>(base mean) | Log2 fold-change |             |             |
|-----------------------------|------------|---------------------------------|------------------|-------------|-------------|
|                             |            |                                 | Fruit age (WAMB) |             |             |
|                             |            |                                 | 8                | 12          | 16          |
| Plasma membrane H(+)-ATPase |            |                                 |                  |             |             |
| AHA1.1                      | Acc00906.1 | 516.9                           | -0.1             | <b>-0.8</b> | <b>-0.9</b> |
| AHA2.1                      | Acc09795.1 | 1516.8                          | -0.1             | <b>-0.4</b> | <b>0.3</b>  |
| AHA2.2                      | Acc22690.1 | 6.6                             | -0.6             | -0.7        | -0.1        |
| AHA7.1                      | Acc07688.1 | 0.8                             | 0.4              | -0.1        | 0.9         |
| AHA7.2                      | Acc14064.1 | 375.4                           | -0.1             | 0.2         | <b>0.9</b>  |
| AHA8.1                      | Acc00689.1 | 29.3                            | 0.0              | -0.6        | <b>-1.1</b> |
| AHA8.2                      | Acc10061.1 | 0.8                             | -2.1             | 0.2         | 1.7         |
| AHA8.3                      | Acc14537.1 | 10.5                            | -0.5             | -0.2        | -0.6        |
| AHA9.1                      | Acc22147.1 | 0.2                             | 0.0              | 0.0         | 0.3         |
| AHA9.2                      | Acc26895.1 | 0.2                             | 0.1              | -0.2        | -0.1        |
| AHA10.1                     | Acc12867.1 | 59.2                            | -0.1             | -0.6        | <b>-1.4</b> |
| AHA10.2                     | Acc17609.1 | 801.3                           | -0.1             | -0.1        | <b>-0.7</b> |
| AHA11.1                     | Acc02371.1 | 180.5                           | -0.6             | <b>-0.8</b> | <b>-1.0</b> |
| AHA11.2                     | Acc15848.1 | 54.3                            | -0.2             | -0.2        | -0.1        |
| AHA11.3                     | Acc16129.1 | 0.1                             | 0.9              | 0.2         | 0.6         |
| AHA11.4                     | Acc18223.1 | 1390.9                          | 0.0              | -0.1        | <b>0.3</b>  |
| AHA11.5                     | Acc29838.1 | 2399.3                          | 0.0              | -0.3        | -0.1        |

Log2 fold-change

-5      0      5

**Figure S4:** Heat-map of kiwifruit plasma membrane H(+)-ATPase genes. DESeq comparison of low carbohydrate supply versus high carbohydrate supply treatments. For each gene, the expression level (base mean) and the log2 fold-change are presented. Fruit age is in weeks after mid bloom (WAMB). Bold figures mean differences are significant for adjusted  $p < 0.05$ .
