# Supplementary material for: Phytohormone and Transcriptomic Analysis Reveals Endogenous Cytokinins Affect Kiwifruit Growth under Restricted Carbon Supply
Source: Metabolites. 2020 Jan 4;10(1):23. doi: 10.3390/metabo10010023 (PMC7022440; doi:10.3390/metabo10010023)
Supplement: Supplementary file 1 [file metabolites-10-00023-s001.zip › Supplementary tables_SN.xlsx]

## Sheet: Table S1
Table S1: Proportion of cytokinins types on total cytokinin concentrations in different treatments. Only cytokinins above the detection limit were included. WAMB, weeks after mid bloom.
Treatment	Fruit age (WAMB)	Proportion of total cytokinins (%)
		Active cytokinins1	Cytokinin ribosides2	O-glycosylated cytokinins3	N-glycosylated cytokinins4
untreated control	8	9.50677	54.136	10.9821	25.3752
high carbohydrate supply	8	9.39914	51.135	14.1682	25.2977
low carbohydrate supply	8	9.17966	48.6532	11.9099	30.2572
untreated control	12	7.99263	75.3169	5.95544	10.735
high carbohydrate supply	12	5.81821	83.5825	5.01944	5.57982
low carbohydrate supply	12	7.4541	58.9431	17.6268	15.976
untreated control	16	5.72047	90.8945	1.76454	1.6205
high carbohydrate supply	16	5.75907	90.9369	1.83038	1.47362
low carbohydrate supply	16	7.50217	82.5367	5.23237	4.72874
		1includes iP, tZ, cZ
		2 includes iPR, tZR, DZR, cZR
		3 includes tZROG
		4 includes iP9G, tZ9G

## Sheet: Table S2 
Table S2: List of collected samples and biological replicates used for the experiments. WAMB, weeks after mid bloom.
Treatment	Fruit age (WAMB)	Biological replicate	Availability	Notes
untreated control	8	1	yes
untreated control	8	2	yes
untreated control	8	3	yes
untreated control	8	4	yes
high carbohydrate supply	8	1	yes
high carbohydrate supply	8	2	yes
high carbohydrate supply	8	3	yes
high carbohydrate supply	8	4	yes
low carbohydrate supply	8	1	yes
low carbohydrate supply	8	2	yes	but not for cytokinin as sample lost during extraction
low carbohydrate supply	8	3	yes
low carbohydrate supply	8	4	yes
untreated control	12	1	yes
untreated control	12	2	yes
untreated control	12	3	yes
untreated control	12	4	yes
high carbohydrate supply	12	1	yes
high carbohydrate supply	12	2	yes
high carbohydrate supply	12	3	yes
high carbohydrate supply	12	4	no	sample lost in the orchard as shoot broke
low carbohydrate supply	12	1	yes
low carbohydrate supply	12	2	yes
low carbohydrate supply	12	3	yes
low carbohydrate supply	12	4	yes
untreated control	16	1	yes
untreated control	16	2	yes
untreated control	16	3	yes
untreated control	16	4	yes
high carbohydrate supply	16	1	yes
high carbohydrate supply	16	2	yes
high carbohydrate supply	16	3	yes
high carbohydrate supply	16	4	yes
low carbohydrate supply	16	1	yes
low carbohydrate supply	16	2	yes	but not for cytokinin as sample lost during extraction
low carbohydrate supply	16	3	yes
low carbohydrate supply	16	4	yes

## Sheet: Table S3 
Table S3: Multiple reaction monitoring (MRM) transitions used for cytokinin analysis. Optimised Q1 and Q3 transitions, retention time (RT), labelled internal standard used for quantification (IS), declustering potential (DP), entrance potential (EP), collision energy (CE) and collision cell exit potential (CXP) for each of the analysed cytokinins.
Q1	Q3	RT	Compound	IS	DP	EP	CE	CXP
382	220	2.1	tZ7G	[2H5] (9G) Z	50	10	35	13
384	222	2.51	DHZ7G	[2H5] (9G) Z	50	10	31.1	20
357	225	2.61	[2H5] (9G) Z		50	10	27	20
382	220	2.67	tZ9G	[2H5] (9G) Z	50	10	27	18
387	225	2.95	[2H5] tZOG		50	10	45	4
384	222	3.22	DHZ9G	[2H5] (9G) Z	50	10	32.1	20
225	136	3.64	[2H5] Z		50	10	32	13
382	136	3.65	cZOG	[2H5] tZOG	50	10	35	13
220	136	3.74	tZ	[2H5] Z	50	10	23	12
384	222	4.32	DHZOG	[2H5] tZOG	50	10	32.1	20
514	220	4.43	tZROG	[2H5] tZROG	50	10	37	6
222	136	4.59	DHZ	[2H5] Z	50	10	30	12
220	136	4.6	cZ	[2H5] Z	50	10	25	12
514	220	5.41	cZROG	[2H5] tZROG	50	10	24	6
357	225	5.44	[2H5] [9R] Z		50	10	27	20
352	220	5.59	tZR	[2H5] [9R] Z	50	10	25	18
516	222	6.67	DHZROG	[2H5] tZROG	50	10	43	6
352	220	6.83	cZR	[2H5] [9R] Z	50	10	25	18
354	222	7.09	DHZR	[2H5] [9R] Z	50	10	25	6
366	136	7.31	iP7G	no IS	50	10	45	12
366	136	12.06	iP9G	[2H6] iP9G	50	10	45	12
210	137	13.09	[2H6] iP		50	10	22	13
204	136	13.16	2iP	[2H6] iP	50	10	22	12
342	137	13.44	[2H6] [9R] iP		50	10	41	15
336	204	13.49	iPR	[2H6] [9R] iP	50	10	25	6
Abbreviations
2iP	N6-isopentylenyladenine
tZ	trans-zeatin
cZ	cis-zeatin
DHZ	dihydrozeatin
iPR	N6-isopentylenyladenosine
tZR	trans-zeatin riboside
cZR	cis-zeatin riboside
DHZR	dihydrozeatin riboside
iP7G	N6-isopentyladenine-7-glucoside
iP9G	N6-isopentylenyladenine-9-glucoside
cZ9G	cis-zeatin-9-glucoside
cZOG	cis-zeatin-O-glucoside
tZ7G	trans-zeatin-7-glucoside
tZOG	trans-Zeatin-O-Glucoside
tZ9G	trans-Zeatin-9-glucoside
DHZ7G	dihydrozeatin-7-glucoside
DHZOG	dihydrozeatin-O-glucoside
DHZ9G	dihydrozeatin-9-glucoside
cZROG	cis-zeatin-O-glucoside riboside
tZROG	trans-zeatin riboside-O-glucoside
DHZROG	dihydrozeatin-O-glucoside riboside

## Sheet: Table S4
Table S4: Multiple reaction monitoring (MRM) transitions used for acidic phytohormone analysis. Q1 and Q3 transitions, retention time (RT), labelled internal standard used for quantification (IS), declustering potential (DP), entrance potential (EP), collision energy (CE) and collision cell exit potential (CXP) for each of the derivatised acidic phytohormones analysed.
Q1	Q3	RT	Compound	IS	DP	EP	CE	CXP
386	165	5.07	SAG	[2H9] SAG	88	9	20	5
395	165	5.07	[2H9] SAG		88	9	34	5
459	193	7.27	GA8	[2H9] GA8	56	11	39	11
459	193	7.27	[2H9] GA8		43	9	60	17
228	169	8.98	[2H4] SA	[2H9] ([2H4] SA)	60	6	25	16
237	169	8.98	[2H9] ([2H4] SA)		15	10	24	15
224	104	9.08	SA	[2H9] SA	60	6	12	10
233	113	9.08	[2H9] SA		56	10	23	10
432	373	10.63	GA3	[2H9] GA3	182	12	37	10
441	373	10.63	[2H9] GA3		66	10	36	10
261	130	10.68	IAA	[2H9] IAA	100	8	49	12
270	130	10.68	[2H9] IAA		100	10	50	12
434	375	10.83	GA1	[2H9] GA1	240	10	37	10
443	375	10.83	[2H9] GA1		64	10	41	10
267	238	11.2	GA19	[2H9] GA19	60	10	21	20
276	242	11.2	[2H9] GA19		70	10	22	7
432	373	11.7	GA6	[2H9] GA6	182	12	37	10
441	373	11.7	[2H9] GA6		67	10	39	10
356	297	11.92	[2H6] ABA	[2H9] ([2H6] ABA)	100	8	25	23
365	297	11.92	[2H9] ([2H6] ABA)		50	10	28	8
350	291	11.95	ABA	[2H9] ABA	100	8	15	23
359	291	11.95	[2H9] ABA		40	10	27	23
260	231	12.46	GA53	[2H9] GA53	68	7	21	7
269	235	12.46	[2H9] GA53		68	8	23	7
301	242	13.06	[2H5] JA	[2H9] ([2H5] JA)	70	9	25	7
309	241	13.06	[2H9] ([2H5] JA)		70	10	24	7
296	149	13.08	JA	[2H9] JA	70	5	31	12
305	237	13.08	[2H9] JA		90	10	25	7
416	357	13.11	GA5	[2H9] GA5	200	12	36	10
425	357	13.11	[2H9] GA5		61	10	38	10
418	359	13.25	GA51	[2H9] GA51	100	10	38	10
427	359	13.25	[2H9] GA51		100	13	36	4
418	359	13.44	GA20	[2H9] GA20	197	12	36	10
427	359	13.44	[2H9] GA20		89	10	39	9
259	200	13.54	GA24	[2H9] GA24	65	7	27	6
268	234	13.54	[2H9] GA24		62	6	22	7
432	373	14.33	GA44	[2H9] GA44	53	12	42	11
441	373	14.33	[2H9] GA44		79	12	44	11
298	239	14.49	DHJA	[2H9] DJA	160	7	26	7
307	239	14.49	[2H9] DJA		160	7	26	7
418	359	15.13	[2H2] GA7	[2H9] ([2H2] GA7)	92	10	34	10
427	359	15.13	[2H9] ([2H2] GA7)		40	10	35	10
416	357	15.18	GA7	[2H9] GA7	202	12	34	10
425	357	15.18	[2H9] GA7		87	10	36	9
418	359	15.91	GA4	[2H9] GA4	20	12	37	10
427	359	15.91	[2H9] GA4		53	10	39	10
324	265	15.93	OPC4	[2H9] OPC4	131	7	25	8
333	265	15.93	[2H9] OPC4		131	7	25	8
419	360	17.04	[2H10] JA-Ile	[2H9] ([2H10] JA-Ile)	83	4	30	11
428	360	17.04	[2H9] ([2H10] JA-Ile)		83	7	32	11
409	73	17.06	JA-Ile	[2H9] JA-Ile	192	12	25	9
418	73	17.06	[2H9] JA-Ile		70	10	61	8
402	225	17.29	GA9	[2H9] GA9	57	10	50	18
411	225	17.29	[2H9] GA9		64	10	49	17
416	239	17.36	GA15	[2H9] GA15	69	11	53	21
425	239	17.36	[2H9] GA15		66	12	55	22
378	319	17.51	cis-OPDA	[2H9] cis-OPDA	86	10	16	8
387	319	17.51	[2H9] cis-OPDA		86	10	28	8
Abbreviations
SA	salicylic acid
JA	jasmonic acid
DHJA	9,10 dihydro jasmonic acid
12-OH-JA	12-hydroxyjasmonic acid
OPC4	(+/-)-OPC4
ABA	abscisic acid
cis-OPDA	cis-(+)-12-Oxo-phytodienoic acid
SAG	salicylic acid beta-D-glucoside
JA-Ile	jasmonyl IsoLeucine
IAA	indole-3-acetic acid
GA1	gibberellin A1
GA3	gibberellic acid
GA4	gibberellin A4
GA5	gibberellin A5
GA6	gibberellin A6
GA7	gibberellin A7
GA8	gibberellin A8
GA9	gibberellin A9
GA15	gibberellin A15
GA19	gibberellin A19
GA20	gibberellin A20
GA24	gibberellin A24
GA44	gibberellin A44
GA51	gibberellin A51
GA53	gibberellin A53

## Sheet: Table S5
Table S5: DESeq pairwise comparison between low carbohydrate supply (LC) and high carbohydrate supply (HC) samples at 8, 12 and 16 weeks after mid bloom. Gene model numbers are from the Red5 Actinidia chinensis var. chinensis genome (Pilkington et al., 2018). Gene model description is also included for the gene mined for this paper. Expression level, log2 fold-changes (log2FC) and adjusted P valu…
gene model	Expression level (baseMean)	LCvsHC_8w_log2FoldChange	LCvsHC_8w_padj	LCvsHC_12w_log2FoldChange	LCvsHC_12w_padj	LCvsHC_16w_log2FoldChange	LCvsHC_16w_padj	arabidopsis gene	description	family	gene
Acc00111.1	0.0129385	-0.365198	0.999954	-0.125544	NA	-0.0805587	NA
Acc00112.1	130.109	0.06649	0.999954	0.488505	0.0638554	0.74511	0.000291525
Acc00113.1	411.933	-0.130753	0.999954	0.22115	0.412893	0.328247	0.0738707
Acc00114.1	7.21179	0.0434942	0.999954	1.8978	0.00011868	0.85521	0.207773
Acc00115.1	93.3793	0.0343579	0.999954	2.15992	0.0112816	3.7418	1.137e-07
Acc00116.1	27.4775	0.060417	0.999954	-0.54137	0.100989	0.0427581	0.907223
Acc00117.1	18.2575	1.14777	0.424752	0.0159504	0.986972	1.52373	0.000648959
Acc00118.1	28.842	0.412642	0.976161	-0.846875	0.0397515	-1.21	0.000292866
Acc00119.1	21.4664	0.482484	0.667662	-0.0896632	0.841741	0.00783696	0.977412
Acc00120.1	31.1239	0.230588	0.999954	1.18119	0.00486199	2.08201	3.48431e-07
Acc00121.1	223.747	0.0172674	0.999954	-0.16785	0.346001	0.103314	0.44757
Acc00122.1	18.2557	0.0692787	0.999954	-0.0596219	0.910755	-0.337604	0.277382
Acc00123.1	39.3267	-0.217952	0.999954	-0.58384	0.206727	0.0102275	0.978289
Acc00124.1	803.155	-0.0430209	0.999954	-0.295096	0.00125878	-0.324865	2.70155e-06
Acc00125.1	0.435156	0.969388	0.999954	0.198921	NA	-0.0805601	NA
Acc00126.1	0.49819	0.958352	0.999954	-0.130881	NA	0.280113	NA
Acc00127.1	2.27196	-0.209091	0.999954	-1.49389	0.134745	-3.25151	0.00113845
Acc00128.1	113.718	0.376311	0.999954	-1.95001	0.0219776	-2.16905	0.000866074
Acc00129.1	145.224	-0.250041	0.620853	0.238015	0.101953	0.165555	0.148104
Acc00130.1	10.4379	0.309133	0.999954	-0.689377	0.10558	0.588543	0.083319
Acc00131.1	224.804	0.0298959	0.999954	-0.335525	0.00441758	0.0676786	0.553965
Acc00132.1	9.10088	0.099136	0.999954	-0.0508788	0.951078	0.0953943	0.8874
Acc00133.1	87.9802	0.0313965	0.999954	0.190282	0.345795	0.117285	0.479052
Acc00134.1	1143.34	0.222723	0.999954	-0.0246699	0.967274	0.783522	0.00467617
Acc00135.1	52.4059	0.205497	0.999954	-0.13022	0.628418	-0.00726403	0.97175
Acc00136.1	0.263552	-0.306717	0.999954	0.946723	NA	-0.441233	NA
Acc00137.1	228.162	-0.147512	0.931379	-0.0625884	0.70524	-0.261404	0.010741
Acc00138.1	55.1189	-0.33427	0.620853	0.0942549	0.688382	-0.0228203	0.915031
Acc00140.1	117.523	0.0258267	0.999954	-0.0961753	0.643237	-0.092699	0.527613
Acc00141.1	493.782	-0.271637	0.855025	0.432049	0.0321962	0.867858	5.98465e-09
Acc00142.1	710.573	0.16731	0.999954	-0.198969	0.616198	-0.836384	0.000306979
Acc00143.1	19.3917	0.218757	0.999954	-0.233598	0.750605	-1.25599	0.0081679
Acc00144.1	1915.9	0.151444	0.999954	0.0549999	0.907144	-0.421629	0.0808721
Acc00145.1	751.602	-0.0429538	0.999954	0.123365	0.746005	-0.367305	0.100339
Acc00146.1	9.84955	0.0686398	0.999954	-0.121111	0.840734	-0.0252237	0.96413
Acc00147.1	62.4603	0.41959	0.971971	0.130194	0.843372	-2.10471	2.19358e-06
Acc00148.1	198.675	0.0646126	0.999954	-0.3832	0.32302	-0.150328	0.648314
Acc00149.1	0	NA	NA	NA	NA	NA	NA
Acc00150.1	84.0947	0.159031	0.999954	0.531843	0.0198922	0.378362	0.0390181
Acc00151.1	365.39	0.000853956	0.999954	0.138056	0.454472	0.469362	2.8781e-05
Acc00152.1	375.031	-0.133764	0.999954	-0.227338	0.204867	0.0265973	0.878602
Acc00153.1	0.26415	0.0364921	0.999954	-0.121629	NA	0.280113	NA
Acc00154.1	20.0278	0.340887	0.934619	0.41367	0.155151	1.14663	8.6392e-06
Acc00155.1	0.729542	-0.277761	0.999954	-0.158032	0.963436	-0.0805601	0.968221
Acc00156.1	98.4399	-0.203468	0.895209	0.0687535	0.756862	-0.149417	0.313847
Acc00157.1	222.09	0.0321463	0.999954	0.657408	0.0098639	0.997716	1.22033e-07
Acc00158.1	144.938	-0.0349797	0.999954	0.110379	0.601479	-0.338094	0.0122587
Acc00159.1	267.805	-0.100034	0.999954	-0.0958195	0.556385	0.0679761	0.572158
Acc00160.1	51.3152	-0.0734474	0.999954	-0.251431	0.212437	-0.018518	0.93861
Acc00161.1	75.4402	-0.0867376	0.999954	-0.058533	0.803927	0.1902	0.157959
Acc00162.1	136.327	-0.0624907	0.999954	-0.048462	0.838182	-0.383778	0.00261054
Acc00163.1	170.561	-0.071507	0.999954	-0.200996	0.176669	-0.641446	7.18185e-10
Acc00164.1	5.45354	1.28931	0.424752	-0.806117	0.0940766	0.20465	0.707724
Acc00165.1	9.00444	-0.150465	0.999954	-1.23842	0.0133596	-0.503183	0.229948
Acc00166.1	1.79671	1.8851	0.672799	2.04483	0.107496	1.47973	0.254597
Acc00167.1	0.277549	0.503741	0.999954	1.12983	NA	0.280113	NA
Acc00168.1	8.65207	0.0554091	0.999954	0.750485	0.218335	0.33646	0.737649
Acc00169.1	0.42027	0.784787	0.999954	-1.28001	NA	-0.0805601	NA
Acc00170.1	89.7346	0.182718	0.999954	0.152435	0.544575	0.158444	0.382441
Acc00171.1	22.5917	0.35447	0.887709	-0.216695	0.580727	2.01015	5.9984e-07
Acc00172.1	4.2793	-0.364841	0.999954	-0.478299	0.515496	-0.0699248	0.937449
Acc00173.1	0.184296	-0.828131	0.999954	-0.144524	NA	-0.0805597	NA
Acc00174.1	2.78831	0.551129	0.999954	0.389899	0.750444	-0.397142	0.670945
Acc00175.1	51.2714	-0.105012	0.999954	0.314682	0.295845	0.14324	0.557048
Acc00176.1	1.61949	0.236238	0.999954	0.692118	0.618199	0.954425	0.489382
Acc00177.1	545.592	-0.0571218	0.999954	0.486578	0.0265883	1.00619	2.33718e-10
Acc00178.1	0	NA	NA	NA	NA	NA	NA
Acc00180.1	14.5458	-0.506293	0.807597	0.184334	0.723333	0.757544	0.00635514
Acc00181.1	7.65147	0.35488	0.999954	0.223733	0.730752	0.827579	0.022651
Acc00182.1	534.138	-0.0162608	0.999954	-0.20886	0.0317407	-0.347309	1.4687e-06
Acc00183.1	159.706	0.0562311	0.999954	-0.547842	0.00805899	-0.368463	0.0203742
Acc00184.1	415.552	0.017612	0.999954	-0.0212756	0.931164	0.369081	0.00142044
Acc00185.1	76.13	0.0532778	0.999954	-0.0214073	0.942823	-0.298512	0.0488826
Acc00187.1	32.9725	-0.377789	0.66075	0.0153262	0.968684	0.0865668	0.731869
Acc00188.1	3095.79	0.108629	0.999954	0.179009	0.549979	-0.790995	8.18173e-06
Acc00189.1	2.72181	0.114345	0.999954	-0.0403716	0.977204	-0.441234	0.788343
Acc00191.1	2.0194	0.961825	0.96992	-0.576368	0.614923	0.325264	0.702028
Acc00192.1	34.4959	0.00141122	0.999954	-0.160995	0.632576	0.0229554	0.94361
Acc00194.1	0	NA	NA	NA	NA	NA	NA
Acc00195.1	136.588	0.0390769	0.999954	-0.0486375	0.869567	-0.461439	0.00318657
Acc00196.1	52.5256	-0.0866303	0.999954	-0.081892	0.887069	-0.224124	0.515292
Acc00197.1	14.6211	0.18068	0.999954	0.156757	0.765605	0.0503867	0.897275
Acc00198.1	0	NA	NA	NA	NA	NA	NA
Acc00199.1	0	NA	NA	NA	NA	NA	NA
Acc00242.1	0	NA	NA	NA	NA	NA	NA
Acc00243.1	13.8225	0.00331839	0.999954	0.485318	0.25488	-0.00388133	0.990366
Acc00244.1	269.445	-0.0663947	0.999954	-0.313785	0.0696232	-0.569994	4.74924e-06
Acc00245.1	0.163929	1.63023	0.999954	-0.714476	NA	-0.0805597	NA
Acc00246.1	0	NA	NA	NA	NA	NA	NA
Acc00247.1	21.099	0.0370918	0.999954	-0.186623	0.729631	-0.812449	0.0116963
Acc00248.1	147.662	0.207953	0.970438	0.776299	2.4552e-05	0.539686	9.52945e-05
Acc00249.1	0.780996	-0.560989	0.999954	0.378839	0.864867	0.279742	0.885932
Acc00250.1	0	NA	NA	NA	NA	NA	NA
Acc00251.1	0	NA	NA	NA	NA	NA	NA
Acc00252.1	0	NA	NA	NA	NA	NA	NA
Acc00253.1	0	NA	NA	NA	NA	NA	NA
Acc00335.1	0	NA	NA	NA	NA	NA	NA
Acc00336.1	193.266	-0.156492	0.932437	-0.202568	0.125811	-0.439924	6.78015e-07
Acc00337.1	0	NA	NA	NA	NA	NA	NA
Acc00338.1	2586.8	0.00236184	0.999954	0.267805	0.57937	0.923549	0.00140549
Acc00339.1	90.983	-0.102461	0.999954	0.114455	0.635848	-0.105836	0.525045
Acc00340.1	105.714	-0.0622752	0.999954	-0.0740072	0.762151	-0.0844492	0.609566
Acc00341.1	0.0417097	0.420714	0.999954	0.216847	NA	-0.0805587	NA
Acc00342.1	104.105	0.028543	0.999954	-0.0115091	0.96303	-0.221242	0.0675971
Acc00343.1	227.037	0.0946178	0.999954	-0.204584	0.197645	-0.480023	4.98925e-06
Acc00344.1	1414.97	-0.155235	0.999954	-0.558886	0.0154531	-0.611107	0.000464804
Acc00345.1	258.41	-0.155733	0.908126	0.190895	0.165813	-0.28954	0.00378733
Acc00346.1	41.0849	-0.174049	0.999954	0.314147	0.372142	0.934961	7.96768e-05
Acc00347.1	10.3917	0.199316	0.999954	0.141348	0.861277	0.469955	0.360923
Acc00348.1	150.502	0.434035	0.80935	-0.905389	0.000956103	0.0486736	0.876647
Acc00349.1	0.014682	0.00765412	0.999954	-0.142602	NA	-0.0805587	NA
Acc00350.1	29.0193	-0.187405	0.999954	-0.125894	0.750912	-0.532329	0.0258053
Acc00352.1	168.485	0.0498192	0.999954	-0.203763	0.344606	0.19403	0.218947
Acc00353.1	50.7037	-0.0622163	0.999954	-0.321665	0.2771	-0.0895572	0.740445
Acc00354.1	85.1876	0.15279	0.999954	0.127925	0.75075	-0.263629	0.292047
Acc00355.1	1.55038	-0.0995338	0.999954	1.25483	0.432757	-0.0805601	0.96568
Acc00356.1	446.685	-0.214379	0.511892	-0.0894451	0.503526	-0.263648	0.00108017
Acc00357.1	117.477	-0.128036	0.999954	0.0606963	0.829882	-0.068277	0.732404
Acc00358.1	157.806	0.0718996	0.999954	0.00654955	0.978888	0.323058	0.0041208
Acc00359.1	425.543	0.0754757	0.999954	-0.0436951	0.761155	-0.0885517	0.318746
Acc00360.1	18.8423	0.0138063	0.999954	-0.0525552	0.927668	0.635808	0.025144
Acc00361.1	371.862	-0.106942	0.999954	0.222474	0.059352	0.281554	0.000987947
Acc00362.1	0.253959	1.22805	0.999954	-0.516567	NA	-0.08056	NA
Acc00363.1	115.95	-0.133658	0.999954	-0.244031	0.389654	-0.277332	0.179194
Acc00364.1	613.92	0.13762	0.999954	0.0956117	0.759431	-0.349476	0.0603386
Acc00365.1	123.186	0.19233	0.931379	-0.287635	0.0871815	-0.533037	1.69528e-05
Acc00366.1	411.53	-0.0407562	0.999954	0.176483	0.204042	0.405234	1.46563e-05
Acc00367.1	81.3966	0.017475	0.999954	0.525284	0.0909631	-0.164621	0.535944
Acc00368.1	485.421	-0.211795	0.359248	0.120411	0.226404	-0.0872059	0.253061
Acc00369.1	321.201	-0.048845	0.999954	-0.1821	0.198224	-0.015662	0.912713
Acc00370.1	106.476	0.230112	0.868436	0.0837582	0.783866	0.00781191	0.973308
Acc00371.1	136.732	-0.0416164	0.999954	-8.33162e-05	0.99984	0.229758	0.125935
Acc00372.1	205.576	-0.00288654	0.999954	-0.539689	0.00454881	-0.689146	1.36018e-06
Acc00373.1	271.543	-0.0710084	0.999954	-0.306486	0.0170073	-0.380474	9.51206e-05
Acc00374.1	793.63	-0.0404517	0.999954	-0.0142232	0.947289	0.120022	0.282915
Acc00375.1	91.6777	0.0319928	0.999954	-0.0563897	0.798094	-0.177635	0.172413
Acc00376.1	0.194831	-0.311565	0.999954	0.232163	NA	-0.0805599	NA
Acc00377.1	53.0478	0.0125546	0.999954	-0.144933	0.646852	0.055424	0.820713
Acc00378.1	68.3366	0.162156	0.999954	-0.225524	0.360192	0.127812	0.517651
Acc00379.1	25.771	-0.333811	0.953891	0.0892071	0.830957	0.354815	0.160519
Acc00380.1	195.568	-0.00255432	0.999954	-0.205168	0.273127	-0.370555	0.00338569
Acc00381.1	0.77313	0.223236	0.999954	-1.8665	0.243753	-0.0805601	0.96568
Acc00382.1	137.615	-0.13487	0.999954	0.0667167	0.73691	0.281011	0.0163826
Acc00383.1	4085.36	0.0354519	0.999954	-0.81743	0.000286388	-0.891373	3.59261e-07
Acc00384.1	0.479607	0.193826	0.999954	0.177089	NA	1.00262	NA
Acc00385.1	438.095	-0.0395771	0.999954	-0.36898	0.0216293	-0.484694	8.34156e-05
Acc00386.1	322.181	-0.121959	0.999954	-0.0836996	0.643497	-0.0478644	0.736327
Acc00387.1	2561.03	0.0131141	0.999954	-0.265486	0.087358	-0.267459	0.0221234
Acc00388.1	73.3865	-0.0722693	0.999954	-0.0764774	0.776966	0.24203	0.138963
Acc00389.1	30.4286	0.517179	0.629737	0.522919	0.130755	-0.0335836	0.962905
Acc00390.1	291.605	-0.0810796	0.999954	0.0384428	0.858093	-0.347664	0.00124211
Acc00391.1	66.1509	0.195391	0.999954	0.0557835	0.876907	0.306992	0.260855
Acc00392.1	158.824	-0.149477	0.999954	0.255333	0.218433	-0.0132041	0.954976
Acc00393.1	40.7218	-0.147124	0.999954	-0.229353	0.466169	-0.692684	0.00181112
Acc00394.1	552.304	-0.173604	0.999954	-0.347823	0.189954	-1.25849	7.05233e-13
Acc00395.1	145.653	-0.12434	0.999954	0.202442	0.13863	0.0503418	0.71689
Acc00396.1	0.426835	1.16066	0.999954	0.0502994	NA	0.280113	NA
Acc00398.1	257.94	-0.10878	0.999954	0.332372	0.0391425	0.431399	0.000431258
Acc00399.1	128.994	0.134739	0.999954	0.00757971	0.977204	0.00218217	0.987761
Acc00400.1	53.7189	-0.0829902	0.999954	-0.876844	0.0100336	-0.554976	0.0631409
Acc00401.1	83.059	-0.138591	0.999954	-0.178847	0.355894	0.332427	0.00789952
Acc00403.1	205.341	0.105991	0.999954	-0.0868119	0.62031	0.112271	0.345868
Acc00404.1	94.1534	-0.0940188	0.999954	-0.318518	0.0614964	-0.0484793	0.789568
Acc00405.1	106.257	-0.0276984	0.999954	0.155357	0.506649	0.191108	0.266888
Acc00406.1	206.618	-0.182554	0.783094	-0.158197	0.259734	-0.158401	0.125744
Acc00407.1	147.44	0.28096	0.953891	-0.0930927	0.788509	0.252587	0.220739
Acc00408.1	0.721358	1.7294	0.980616	0.481702	0.854666	-1.09273	0.401011
Acc00409.1	93.2533	-0.0539436	0.999954	0.450406	0.014815	0.0310712	0.872509
Acc00410.1	13.7232	-0.00710544	0.999954	1.41711	0.00472428	1.28768	0.00102251
Acc00411.1	0.567025	0.522248	0.999954	1.05605	NA	0.681808	NA
Acc00412.1	192.798	-0.0135463	0.999954	-0.382436	0.00649235	-0.725651	3.31653e-12
Acc00413.1	165.584	-0.0330705	0.999954	-0.189452	0.243383	-0.383817	0.000558178
Acc00414.1	0.11336	0.0654702	0.999954	-0.15142	NA	0.64078	NA
Acc00415.1	65.3554	-0.24659	0.999954	0.566854	0.0390206	0.0723263	0.796706
Acc00416.1	251.258	0.143121	0.999954	-0.308486	0.0553925	-0.00232536	0.987084
Acc00417.1	0.0416077	0.0478627	0.999954	-0.126762	NA	-0.0805587	NA
Acc00418.1	1337.51	0.123541	0.999954	-0.45245	0.016859	0.221546	0.161168
Acc00419.1	252.601	0.10791	0.999954	0.288444	0.323766	0.813856	1.51837e-05
Acc00420.1	115.993	0.00667521	0.999954	-0.349956	0.0294132	-0.319341	0.0127181
Acc00421.1	123.388	-0.0852154	0.999954	-0.0855503	0.690038	-0.234531	0.059844
Acc00422.1	70.7201	0.0203779	0.999954	0.3326	0.160507	0.345184	0.0848962
Acc00423.1	195.16	0.164281	0.999954	0.469524	0.122177	1.05646	1.6185e-06
Acc00425.1	0.0297622	0.0137464	0.999954	0.209536	NA	-0.0805587	NA
Acc00426.1	0.014682	0.00765412	0.999954	-0.142602	NA	-0.0805587	NA
Acc00428.1	0.186943	-1.7427	0.999954	-0.361962	NA	0.280113	NA
Acc00429.1	138.088	-0.185352	0.738286	0.21062	0.0970112	-0.116457	0.282808
Acc00431.1	0.174969	-0.313584	0.999954	-1.12912	NA	-0.0805597	NA
Acc00432.1	5.02486	-0.0187724	0.999954	0.254298	0.74648	0.349449	0.547568
Acc00334.1	200.979	-0.146994	0.953891	0.120412	0.43259	-0.163935	0.124073
Acc00332.1	142.519	0.133317	0.999954	1.89788	0.00113771	2.54762	7.68048e-09
Acc00331.1	19.6737	0.208966	0.999954	0.87954	0.0216813	1.05588	0.00413572
Acc00330.1	203.855	-0.229073	0.405372	0.138424	0.229237	-0.150482	0.0805409
Acc00329.1	0.216753	-1.27656	0.999954	-1.92661	NA	-0.801905	NA
Acc00328.1	36.9199	-0.134748	0.999954	0.0162414	0.970267	0.165665	0.455505
Acc00327.1	10.677	-0.12605	0.999954	0.542833	0.272703	0.148563	0.746033
Acc00326.1	4.04563	0.399965	0.999954	0.834702	0.295211	0.796257	0.145979
Acc00325.1	61.3492	0.020863	0.999954	0.0162967	0.958316	-0.0801121	0.623595
Acc00324.1	0.0773624	0.0295876	0.999954	0.620152	NA	-0.0805587	NA
Acc00323.1	0.121937	0.886178	0.999954	0.214409	NA	-0.0805595	NA
Acc00322.1	0	NA	NA	NA	NA	NA	NA
Acc00321.1	0.0582518	0.454831	0.999954	-0.119452	NA	-0.441226	NA
Acc00320.1	56.6922	0.12426	0.999954	-0.0832276	0.793518	-0.27586	0.142094
Acc00319.1	0.52602	-1.6314	0.999954	-0.40404	NA	-0.441233	NA
Acc00318.1	40.5052	0.302684	0.999954	0.203285	0.761705	-0.345363	0.413537
Acc00317.1	84.4759	-0.060852	0.999954	0.110793	0.600884	-0.0724956	0.707378
Acc00316.1	72.9743	-0.00990872	0.999954	-0.390779	0.0943783	-0.764912	2.82098e-06
Acc00315.1	433.345	0.0344323	0.999954	0.0540896	0.647344	0.20271	0.00357297
Acc00314.1	0.0318061	0.0137464	0.999954	-0.151131	NA	-0.441226	NA
Acc00313.1	143.841	-0.0107655	0.999954	-0.0491757	0.789534	-0.352965	0.000334081
Acc00312.1	260.325	0.0543328	0.999954	-0.0589055	0.812179	0.4914	0.000125092
Acc00311.1	0	NA	NA	NA	NA	NA	NA
Acc00310.1	1449.57	0.103424	0.999954	-0.568103	0.00125558	0.0690796	0.704561
Acc00306.1	23.2983	-0.216504	0.999954	-0.0690857	0.873747	0.509834	0.0401436
Acc00305.1	30.3834	0.0323462	0.999954	-0.372826	0.27953	0.121921	0.672744
Acc00304.1	5.69958	-0.539926	0.999954	-0.457954	0.475358	-0.791645	0.206697
Acc00303.1	6.39317	0.6496	0.968072	-0.221969	0.798663	0.490445	0.36817
Acc00302.1	0.0319555	0.00156185	0.999954	0.226594	NA	-0.441226	NA
Acc00301.1	15.7284	0.188409	0.999954	0.0149726	0.9785	0.131687	0.692096
Acc00300.1	194.943	0.185211	0.999954	0.496717	0.0110319	-0.0656197	0.745502
Acc00299.1	0.556174	0.144326	0.999954	-0.189042	NA	-0.0805601	NA
Acc00298.1	25.9515	0.140272	0.999954	0.0238512	0.958306	-0.00233533	0.993294
Acc00297.1	3.42656	0.148987	0.999954	1.48879	0.09807	0.918783	0.15558
Acc00296.1	66.3801	-0.20799	0.962315	0.513988	0.00736252	-0.0975541	0.588052
Acc00295.1	54.5234	-0.0374679	0.999954	0.0122665	0.977415	-0.155182	0.513493
Acc00294.1	198.815	0.0150686	0.999954	0.0672155	0.771403	0.391375	0.00227598
Acc00293.1	140.803	-0.107446	0.999954	-0.0932381	0.655186	-0.188763	0.144612
Acc00292.1	114.437	-0.0526689	0.999954	-0.477266	0.00315276	-0.639206	1.31941e-07
Acc00291.1	34.5912	0.427155	0.609183	-0.126881	0.688334	-0.0784243	0.764333
Acc00290.1	53.7053	-0.247843	0.953891	-0.0511907	0.874986	-0.0685417	0.774785
Acc00289.1	0	NA	NA	NA	NA	NA	NA
Acc00288.1	6.97008	0.357514	0.999954	-0.354775	0.779096	-5.39661	1.40673e-07
Acc00287.1	0.42032	-0.504117	0.999954	0.563565	NA	0.640787	NA
Acc00286.1	0.0409325	0.460923	0.999954	-0.127981	NA	-0.0805587	NA
Acc00285.1	0.0134135	-0.00452955	0.999954	-0.125548	NA	-0.0805587	NA
Acc00284.1	380.134	0.267965	0.999954	0.300562	0.549351	1.27175	4.51333e-05
Acc00283.1	60.3515	-0.133436	0.999954	-0.098479	0.711549	-0.126589	0.484485
Acc00282.1	436.177	-0.0166245	0.999954	-0.218954	0.0452627	-0.498672	1.17938e-10
Acc00281.1	340.983	-0.0378483	0.999954	-0.0285616	0.841699	0.0476906	0.624514
Acc00280.1	313.397	-0.0945605	0.999954	0.175364	0.333535	0.364168	0.00180066
Acc00279.1	125.842	-0.0869544	0.999954	-0.0167063	0.935604	-0.244834	0.014291
Acc00278.1	37.1441	0.270242	0.999954	0.0472891	0.913348	-0.165178	0.527469
Acc00277.1	0.0154335	0.00887254	0.999954	-0.721369	NA	-0.0805587	NA
Acc00276.1	346.836	0.0303403	0.999954	-0.0454509	0.807398	0.339748	0.000766035
Acc00275.1	190.039	0.112423	0.999954	0.470308	0.200378	0.624076	0.0164808
Acc00274.1	270.682	0.105421	0.999954	-0.0424327	0.876205	0.0317561	0.872282
Acc00272.1	118.167	-0.0532982	0.999954	-0.373156	0.202764	-0.766334	0.000121754
Acc00271.1	501.91	0.0273384	0.999954	-0.256499	0.0135713	-0.0389964	0.704167
Acc00270.1	10.0158	0.564068	0.712087	0.275019	0.561007	0.614082	0.0751061
Acc00269.1	36.9551	-0.225005	0.985069	0.243154	0.297586	0.124549	0.537995
Acc00268.1	104.855	-0.0194016	0.999954	0.288991	0.0750081	-0.345927	0.00467027
Acc00267.1	0	NA	NA	NA	NA	NA	NA
Acc00266.1	0.0280964	0.426807	0.999954	-0.15235	NA	0.280108	NA
Acc00265.1	51.5752	0.0462058	0.999954	0.389888	0.115197	0.493998	0.00352247
Acc00264.1	622.085	-0.183497	0.999954	-0.0354884	0.907153	0.263684	0.0871794
Acc00263.1	203.784	0.0382333	0.999954	-0.355254	0.0949771	-0.606329	4.78791e-05
Acc00261.1	37.0428	-0.0657872	0.999954	0.280536	0.5528	0.627159	0.0590319
Acc00260.1	16.1197	1.29105	0.65235	0.414162	0.752728	-1.72926	0.0308534
Acc00259.1	141.944	-0.163379	0.999954	-0.20611	0.420275	-0.273993	0.117259
Acc00258.1	43.9742	-0.198204	0.979823	0.129074	0.634839	-0.439471	0.0110626
Acc00257.1	56.2332	0.0345269	0.999954	0.116306	0.747247	-0.4192	0.0435588
Acc00256.1	2.37752	0.493725	0.999954	0.434919	0.829884	0.280113	0.872357
Acc00255.1	64.1772	-0.0550972	0.999954	-0.0493941	0.856963	-0.369304	0.0088869
Acc00254.1	1.40195	-0.453947	0.999954	-0.269172	0.86163	-0.768641	0.490002
Acc00201.1	28.286	-0.244001	0.999954	0.332992	0.279099	0.240501	0.331872
Acc00202.1	47.2731	-0.282115	0.932437	0.139017	0.667394	0.199979	0.318106
Acc00203.1	607.51	0.111911	0.999954	-0.179624	0.405705	-0.292582	0.0462609
Acc00204.1	120.344	-0.0518918	0.999954	0.406362	0.00956023	-0.045882	0.773982
Acc00205.1	323.512	-0.0702172	0.999954	-0.139254	0.326877	-0.131528	0.199985
Acc00206.1	102.792	0.0749218	0.999954	0.120168	0.693739	-1.17308	8.06119e-12
Acc00207.1	28.6389	-0.41832	0.709043	1.0439	0.000124383	0.273462	0.271958
Acc00208.1	83.1739	-0.0935293	0.999954	0.250186	0.207214	-0.0468365	0.799401
Acc00209.1	387.417	0.0201899	0.999954	-0.128517	0.332651	0.369855	1.99944e-05
Acc00211.1	32.7774	-0.108978	0.999954	0.0109258	0.980769	-0.299158	0.206309
Acc00212.1	308.21	-0.132802	0.999954	0.0504243	0.833606	-0.183591	0.189221
Acc00213.1	122.095	0.106361	0.999954	-0.300142	0.275754	-0.0119055	0.96568
Acc00214.1	12.5435	0.108101	0.999954	0.505585	0.26114	-0.164002	0.640639
Acc00215.1	108.907	0.0211432	0.999954	-0.235217	0.260159	-0.170621	0.294896
Acc00216.1	446.369	-0.0607814	0.999954	-0.408337	0.0199251	-0.32652	0.0188797
Acc00217.1	106.527	-0.224151	0.901936	0.134186	0.556606	-0.0740315	0.668541
Acc00218.1	292.725	-0.060943	0.999954	-0.0312002	0.802953	-0.0554283	0.489145
Acc00220.1	289.056	0.264671	0.894541	0.731742	0.000278841	0.615408	9.46277e-05
Acc00222.1	0	NA	NA	NA	NA	NA	NA
Acc00223.1	0.170518	1.25088	0.999954	0.207651	NA	-0.0805598	NA
Acc00224.1	46.9526	0.167393	0.999954	0.0819058	0.801255	-0.0371391	0.871673
Acc00225.1	1325.63	-0.0407717	0.999954	-0.429945	0.000162669	0.221515	0.0187936
Acc00226.1	116.47	0.0596403	0.999954	0.263715	0.195922	-0.00678429	0.969983
Acc00227.1	69.7402	-0.0766712	0.999954	-0.363851	0.28821	-2.04899	1.006e-20
Acc00228.1	157.499	-0.0282634	0.999954	-0.511632	0.00198541	-0.487388	0.000259378
Acc00229.1	180.471	-0.106589	0.999954	0.208574	0.174264	0.0279457	0.855856
Acc00230.1	1.99008	0.386277	0.999954	-1.85403	0.236854	0.280113	0.87442
Acc00231.1	16.66	0.171648	0.999954	0.00568866	0.993413	-0.178526	0.606745
Acc00232.1	0	NA	NA	NA	NA	NA	NA
Acc00233.1	191.326	-0.194006	0.999954	0.180376	0.626856	0.299671	0.200749
Acc00234.1	293.537	0.322852	0.999954	0.278665	0.525508	0.460681	0.121778
Acc00235.1	14.7713	0.112165	0.999954	0.142171	0.764766	-0.344413	0.299622
Acc00236.1	76.313	0.00569312	0.999954	-0.0262375	0.922318	0.00214416	0.989094
Acc00237.1	39.5893	0.415222	0.999954	0.418897	0.557036	0.92157	0.0439276
Acc00238.1	26.8578	0.0205059	0.999954	0.442218	0.175219	-0.259571	0.27782
Acc00239.1	30.6824	0.00241383	0.999954	-1.12717	0.000339083	-0.740203	0.00224874
Acc00240.1	3.49738	0.349096	0.999954	-0.218896	0.806073	-0.699252	0.252054
Acc00241.1	0.023889	0.402438	0.999954	-0.118237	NA	-0.0805587	NA
Acc00433.1	3.81599	0.777317	0.992661	0.654994	0.606582	0.295765	0.686327
Acc00434.1	0	NA	NA	NA	NA	NA	NA
Acc00435.1	192.939	-0.18013	0.999954	0.123023	0.609381	0.309998	0.0389587
Acc00436.1	0.0586933	0.403656	0.999954	-0.697	NA	-0.0805587	NA
Acc00437.1	349.403	-0.0195007	0.999954	-0.309209	0.0217379	-0.202787	0.06568
Acc00438.1	99.3843	0.24599	0.999954	-0.90617	0.0149924	-0.932485	0.00130856
Acc00439.1	55.128	0.0277349	0.999954	0.0246725	0.940085	0.248356	0.162844
Acc00440.1	100.516	-0.00841787	0.999954	0.292365	0.158758	0.301718	0.0457089
Acc00441.1	15.9299	-0.0774703	0.999954	-0.426717	0.357106	-0.17745	0.599513
Acc00442.1	0.769721	-0.0776087	0.999954	0.581989	0.873747	-0.0805601	0.972732
Acc00443.1	199.941	-0.0375651	0.999954	-0.103131	0.632576	0.245115	0.0710727
Acc00444.1	0.159854	-0.328285	0.999954	0.54411	NA	1.0229	NA
Acc00445.1	11.3331	0.367768	0.999954	0.345674	0.510642	0.0308625	0.941559
Acc00446.1	15.4076	-0.0344344	0.999954	-0.245628	0.622618	0.101078	0.799951
Acc00447.1	0	NA	NA	NA	NA	NA	NA
Acc00448.1	114.505	-0.0142085	0.999954	0.308435	0.131799	0.0195646	0.929983
Acc00449.1	0	NA	NA	NA	NA	NA	NA
Acc00450.1	4.53308	0.199815	0.999954	1.04903	0.26341	0.36944	0.572525
Acc00451.1	37.8665	-0.297528	0.874198	-0.0914899	0.78042	0.000692438	0.997501
Acc00452.1	169.466	0.394343	0.969531	0.0558492	0.926313	-0.368167	0.337361
Acc00453.1	0.132758	0.184283	0.999954	-0.171881	NA	-0.0805593	NA
Acc33640.1	229.349	-0.152548	0.999954	-0.219574	0.229284	-0.272605	0.0389264
Acc00454.1	0.651985	0.649783	0.999954	0.496717	NA	-1.23696	NA
Acc00455.1	2.00285	0.584263	0.999954	0.339472	0.784678	0.28783	0.766302
Acc00456.1	12.8328	0.0105174	0.999954	0.426872	0.291393	0.809117	0.0178757
Acc00457.1	0.012653	-0.353013	0.999954	-0.142602	NA	-0.0805587	NA
Acc00458.1	171.37	0.00172304	0.999954	0.209563	0.551104	-0.22682	0.355727
Acc00459.1	61.1986	0.398561	0.681251	-0.0345072	0.925631	0.690133	8.14899e-05
Acc00460.1	68.3917	0.132364	0.999954	0.694853	0.00993949	0.846069	0.00214161
Acc00461.1	0.853779	-1.99166	0.89396	1.09193	0.657896	-3.34635	0.0105016
Acc00462.1	0.0787188	-0.679563	0.999954	-0.118241	NA	-0.0805588	NA			EXPB	EXPLB2.2
Acc00463.1	0.364239	0.667754	0.999954	-1.25554	NA	-0.441233	NA
Acc00464.1	38.872	-0.19705	0.999954	-0.493791	0.0916667	-0.692492	0.00104126
Acc00465.1	255.238	-0.101012	0.999954	0.387693	0.0132063	0.481126	5.56255e-05
Acc00466.1	114.631	-0.0479608	0.999954	0.0585401	0.841874	0.164288	0.323165
Acc00467.1	231.818	-0.0585804	0.999954	-0.0165401	0.949026	-0.0729632	0.634439
Acc00468.1	60.175	0.0247941	0.999954	-0.146165	0.601537	-0.342456	0.0619337
Acc00469.1	61.0694	0.106719	0.999954	0.136381	0.554141	0.0626023	0.736398
Acc00470.1	31.334	0.132332	0.999954	-0.276894	0.408419	0.226762	0.47705
Acc00471.1	109.656	-0.118963	0.999954	0.00713144	0.97976	-0.178345	0.177935
Acc00472.1	0.014682	0.00765412	0.999954	-0.142602	NA	-0.0805587	NA
Acc00473.1	24.3291	-0.100173	0.999954	-0.623565	0.0650211	-0.285405	0.327407
Acc00474.1	35.6574	-0.128272	0.999954	0.277751	0.316832	-0.390948	0.0440091
Acc00475.1	165.236	-0.0104282	0.999954	0.188242	0.317392	0.504953	3.4401e-05
Acc00476.1	0	NA	NA	NA	NA	NA	NA
Acc00477.1	52.986	-0.16319	0.999954	0.284893	0.176318	0.559697	0.000144448
Acc00478.1	59.0461	-0.192759	0.999954	-0.191988	0.652192	-0.108948	0.737595
Acc00479.1	94.7849	0.0944442	0.999954	-0.149559	0.561256	-0.540625	0.000590281
Acc00480.1	13.7287	0.0720983	0.999954	0.0225909	0.976667	0.77668	0.0349021
Acc00481.1	0.0663175	1.26494	0.999954	-0.130457	NA	-0.0805587	NA
Acc00482.1	340.69	-0.153573	0.717812	0.03162	0.821377	0.142488	0.0624945
Acc00483.1	0.039598	-0.312804	0.999954	-0.126762	NA	-0.0805587	NA
Acc00484.1	2.46441	0.407618	0.999954	0.183797	0.912562	-0.486576	0.532826
Acc00485.1	60.0894	-0.10362	0.999954	-0.257616	0.147427	-0.150475	0.284906
Acc00486.1	14.6678	0.255041	0.999954	0.359568	0.443069	0.16721	0.650581
Acc00487.1	56.4754	0.0685113	0.999954	-0.114611	0.672881	-0.15538	0.421954
Acc00488.1	0	NA	NA	NA	NA	NA	NA
Acc00489.1	137.524	-0.220193	0.813789	0.122546	0.544746	-0.0577181	0.710816
Acc00490.1	68.0657	0.0356224	0.999954	0.0304481	0.916244	0.121692	0.429621
Acc00491.1	41.674	0.00604858	0.999954	0.00447675	0.993413	0.0352614	0.923949
Acc00492.1	0.248843	1.42264	0.999954	1.23968	NA	-0.442289	NA
Acc00493.1	1955.5	-0.186012	0.999954	0.0686721	0.827494	0.514906	0.00192353
Acc00494.1	44.2441	0.0666567	0.999954	0.738314	0.024153	0.828557	0.00156161
Acc00495.1	0.0336285	0.00156185	0.999954	-0.134073	NA	-0.441226	NA
Acc00496.1	0.131941	-1.03451	0.999954	-0.13313	NA	-0.0805595	NA
Acc00497.1	441.819	0.15209	0.999954	0.987965	0.000121201	0.917946	6.04978e-06
Acc00498.1	646.769	-0.105714	0.999954	-0.0143228	0.948975	-0.071972	0.572003
Acc00499.1	157.696	0.0767838	0.999954	-0.0985412	0.650377	0.236134	0.0994309
Acc00500.1	10.7119	0.249452	0.999954	-1.23353	0.112727	-2.83213	5.29442e-06
Acc00501.1	0.340511	1.75295	0.999954	-0.137719	NA	-0.0805596	NA
Acc00502.1	0.0686248	0.833777	0.999954	-0.145051	NA	-0.0805587	NA
Acc00503.1	0.472987	0.0695469	0.999954	-0.102428	NA	-0.0805601	NA
Acc00504.1	2.68712	1.31156	0.796725	4.5411	0.000862656	2.37468	0.0489837
Acc00505.1	30.8576	0.319932	0.999954	0.492343	0.278921	1.13774	0.000250378
Acc00506.1	0.157042	-1.12062	0.999954	1.01733	NA	0.640784	NA
Acc00507.1	0.147765	-0.730235	0.999954	-0.33584	NA	0.968788	NA
Acc00508.1	0.271741	-0.159891	0.999954	0.00845992	NA	-0.801906	NA
Acc00509.1	13.3316	-0.0837308	0.999954	0.300227	0.557759	0.438918	0.191785
Acc00510.1	5.15162	0.139439	0.999954	-0.701665	0.514032	-0.0805601	0.96568
Acc00511.1	0	NA	NA	NA	NA	NA	NA
Acc00512.1	0.68505	0.291333	0.999954	-0.174242	NA	-0.0805601	NA
Acc00513.1	9.24403	0.953242	0.511892	0.0555622	0.946073	1.36052	0.000501215
Acc00514.1	0.0826197	-0.706369	0.999954	-0.729911	NA	-0.0805588	NA
Acc00515.1	0.575032	1.15119	0.999954	2.61239	NA	-0.441233	NA
Acc00516.1	21.0184	-0.233996	0.999954	0.136545	0.76545	-0.22208	0.500957
Acc00517.1	0.271551	1.243	0.999954	0.219814	NA	-1.1283	NA
Acc00518.1	167.658	0.0600796	0.999954	-0.0593852	0.804091	-0.174712	0.210779
Acc00519.1	0	NA	NA	NA	NA	NA	NA
Acc00520.1	4.22178	-0.720585	0.999954	1.6013	0.325429	6.09442	7.03434e-07
Acc00521.1	2.03073	0.826727	0.93212	2.43556	0.110705	-1.23601	0.325347
Acc00522.1	0.164723	-0.318359	0.999954	0.169544	NA	1.30297	NA
Acc00524.1	31.9747	-0.0547687	0.999954	-0.2759	0.341805	-0.27427	0.229041
Acc00525.1	0.325012	0.161332	0.999954	0.607231	NA	-0.801907	NA
Acc00526.1	2.16077	0.533869	0.999954	-0.552607	0.80606	0.640787	0.678289
Acc00527.1	147.456	-0.112535	0.999954	-0.145761	0.484235	-0.182707	0.204033
Acc00528.1	0.0553928	1.25293	0.999954	-0.154787	NA	-0.0805587	NA
Acc00529.1	491.318	-0.0569925	0.999954	0.262935	0.442027	0.000381484	0.998721
Acc00530.1	176.402	0.122294	0.999954	0.132755	0.603763	-0.507607	0.000893186
Acc00531.1	33.8223	-0.0812939	0.999954	0.117158	0.775522	0.25616	0.29469
Acc00532.1	68.4072	0.199449	0.999954	-0.215593	0.629487	0.0330366	0.938415
Acc00533.1	4.00094	0.375874	0.999954	1.7415	0.24697	-0.437083	0.620016
Acc00534.1	59.3639	0.211787	0.999954	0.605014	0.0395817	-0.25418	0.426564
Acc00535.1	0.0968893	0.44362	0.999954	1.18008	NA	-0.0805587	NA
Acc00536.1	7.01904	0.226784	0.999954	1.10254	0.101137	1.4286	0.0511625
Acc00537.1	14.6172	0.131166	0.999954	0.512144	0.245386	0.343884	0.279854
Acc00538.1	26.1761	0.448576	0.953891	0.123637	0.8432	0.7301	0.0938899
Acc00539.1	5.16125	0.0986955	0.999954	0.270244	0.838261	0.636783	0.671583
Acc00540.1	200.132	0.0868477	0.999954	-0.421017	0.0580253	-0.258115	0.155212
Acc00541.1	236.66	0.25497	0.994627	-0.437041	0.100878	-0.00807106	0.973401
Acc00542.1	307.991	0.185956	0.999954	0.0834991	0.869463	-0.884648	0.00129444
Acc00543.1	15.6784	0.457071	0.999954	-0.121181	0.827888	0.728647	0.0124195
Acc00544.1	0.0136859	0.40853	0.999954	-0.126762	NA	-0.0805587	NA
Acc00545.1	0	NA	NA	NA	NA	NA	NA
Acc00546.1	241.404	-0.0708549	0.999954	0.0233329	0.930306	0.165118	0.242373
Acc00547.1	163.574	-0.149974	0.816372	-0.198579	0.0676588	-0.146861	0.0902175
Acc00548.1	44.5131	-0.0731315	0.999954	-0.156374	0.580898	-0.11494	0.621147
Acc00549.1	189.692	0.0771403	0.999954	-0.220437	0.246605	0.266611	0.0518426
Acc00550.1	0.0275391	0.414622	0.999954	0.225376	NA	-0.0805587	NA
Acc00551.1	3.13884	0.0840732	0.999954	-0.419299	0.637657	1.33959	0.0578312
Acc00552.1	15.9325	-0.186575	0.999954	-0.109062	0.863377	-0.157244	0.674595
Acc00553.1	140.861	0.00976267	0.999954	-0.0714983	0.795978	0.147128	0.393548
Acc00554.1	0	NA	NA	NA	NA	NA	NA
Acc00555.1	5.68349	-0.496023	0.999954	-0.28995	0.688215	-0.44375	0.442699
Acc00556.1	84.4422	-0.243142	0.999954	-0.169752	0.66858	0.394725	0.111746
Acc00557.1	1.47027	-0.617732	0.999954	-1.29391	0.271566	-0.0820801	0.954952
Acc00558.1	62.7351	0.33559	0.846145	0.530984	0.0444511	0.994934	2.79223e-06
Acc00559.1	40.8058	0.0444022	0.999954	0.314352	0.270947	0.217173	0.339173
Acc00560.1	0.0127677	-0.353013	0.999954	-0.142602	NA	-0.0805587	NA
Acc00561.1	226.146	-0.126933	0.999954	-0.0381431	0.846871	-0.301605	0.0027079
Acc00562.1	4.03641	-0.000483543	0.999954	0.181632	0.87247	1.12843	0.0607117
Acc00563.1	3.84093	0.178223	0.999954	-0.162531	0.88233	1.03972	0.100593
Acc00564.1	0	NA	NA	NA	NA	NA	NA
Acc00565.1	11.4006	0.0848983	0.999954	1.72478	0.00867135	0.401165	0.529213
Acc00566.1	321.724	-0.0250349	0.999954	-0.24199	0.104766	-0.664345	1.0119e-10
Acc00567.1	219.25	0.0996938	0.999954	0.489934	0.0507773	0.438629	0.0209308
Acc00568.1	0	NA	NA	NA	NA	NA	NA
Acc00569.1	0.918206	0.100702	0.999954	0.258486	0.935508	0.247209	0.895252
Acc00570.1	0	NA	NA	NA	NA	NA	NA
Acc00571.1	5.98694	0.448207	0.999954	0.277527	0.74659	0.0288906	0.96568
Acc00572.1	0.16391	0.535503	0.999954	0.582543	NA	-0.441232	NA
Acc00573.1	0	NA	NA	NA	NA	NA	NA
Acc00574.1	23.3702	0.0664675	0.999954	0.116338	0.771608	-0.283628	0.202837
Acc00576.1	390.096	-0.185279	0.999954	0.297788	0.22466	0.246724	0.180939
Acc00577.1	112.71	0.0140696	0.999954	0.0752835	0.654068	-0.330179	0.000471009
Acc00578.1	0.0297888	0.00156185	0.999954	0.226594	NA	-0.0805587	NA
Acc18719.1	42.9025	0.254596	0.998598	-0.461485	0.0930562	0.472148	0.0261235
Acc18723.1	6.65371	0.346261	0.999954	-0.0733502	0.932969	0.70446	0.129563
Acc18722.1	134.747	0.0852069	0.999954	-0.261128	0.197645	-0.346372	0.0185232
Acc18721.1	0.576802	-1.01118	0.999954	-1.77167	NA	-1.73111	NA
Acc18720.1	0	NA	NA	NA	NA	NA	NA
Acc00579.1	301.931	0.199355	0.999954	-0.0550981	0.922262	0.508389	0.0719661
Acc00580.1	0	NA	NA	NA	NA	NA	NA
Acc00581.1	93.1966	-0.340947	0.844353	0.0111282	0.977301	0.632729	0.000268141
Acc00582.1	812.225	-0.0400306	0.999954	0.0732102	0.723831	0.534844	1.44985e-06
Acc00583.1	0.423535	1.95431	0.999954	1.56676	NA	1.00146	NA
Acc00584.1	0	NA	NA	NA	NA	NA	NA
Acc00585.1	29.5328	0.334443	0.999954	0.264266	0.596054	0.494571	0.0913578
Acc00586.1	1.36659	1.20767	0.999954	-1.93801	0.129049	-1.13174	0.29023
Acc00587.1	4.61207	0.125564	0.999954	-0.321426	0.675215	0.0186587	0.982486
Acc00588.1	0.437288	-0.185592	0.999954	1.07845	NA	-0.0805601	NA
Acc00589.1	37.9864	0.466552	0.992256	-0.833361	0.0742376	0.426783	0.26517
Acc00631.1	138.289	0.0150778	0.999954	-0.244896	0.0562992	0.0876745	0.450634
Acc00632.1	49.2177	-0.343344	0.878123	-0.117847	0.707791	0.0776297	0.773943
Acc00633.1	57.3262	-0.0724124	0.999954	0.274014	0.196353	0.548203	0.00109398
Acc00634.1	0.188246	1.11567	0.999954	-0.110924	NA	-0.0805599	NA
Acc00635.1	0	NA	NA	NA	NA	NA	NA
Acc00636.1	303.744	0.0821542	0.999954	0.0877792	0.692773	0.643211	2.1144e-07
Acc00637.1	17.2159	0.346001	0.999954	0.116007	0.831922	0.340326	0.273713
Acc00638.1	294.043	-0.00669575	0.999954	-0.172656	0.190382	-0.344575	7.67799e-05
Acc00639.1	33.026	0.141497	0.999954	0.174043	0.735191	0.606102	0.0429683
Acc00640.1	34.1202	-0.112791	0.999954	-0.0541634	0.908539	0.667136	0.00372521
Acc00641.1	0.124209	-0.344484	0.999954	-0.947998	NA	-0.0805587	NA
Acc00642.1	69.6465	0.239733	0.910112	0.275425	0.20078	0.400687	0.0144988
Acc00643.1	0.613969	0.544361	0.999954	0.12754	NA	-0.173779	NA
Acc00644.1	0	NA	NA	NA	NA	NA	NA
Acc00645.1	0	NA	NA	NA	NA	NA	NA
Acc00646.1	280.913	0.0541203	0.999954	0.0778686	0.828733	0.347561	0.0844125
Acc00647.1	0.0660109	-0.30062	0.999954	0.577514	NA	-0.0805587	NA
Acc00648.1	12.4454	-0.043543	0.999954	0.446529	0.300827	-0.240341	0.581119
Acc00649.1	379.57	0.27721	0.896543	-0.868541	1.87821e-05	-0.484098	0.00402913
Acc00650.1	56.1987	-0.00253219	0.999954	0.229818	0.458692	0.524636	0.00687566
Acc00651.1	48.1507	0.114605	0.999954	0.00595994	0.988636	0.0950423	0.718609
Acc00652.1	0	NA	NA	NA	NA	NA	NA
Acc00653.1	9.33406	0.436833	0.999954	-1.31228	0.00920352	-0.400602	0.500719
Acc00654.1	35.8256	-0.0430419	0.999954	-0.0470191	0.94393	0.0640072	0.885893
Acc00655.1	206.554	-0.0675403	0.999954	-0.0300495	0.90211	-0.261273	0.0470497
Acc00656.1	98.602	-0.0105851	0.999954	0.173127	0.316256	0.514521	1.76628e-05
Acc00657.1	0.0125226	0.00765412	0.999954	-0.142602	NA	-0.0805587	NA
Acc00659.1	0.361653	0.0660359	0.999954	-1.60027	NA	-0.654775	NA
Acc00658.1	425.005	0.106428	0.999954	-0.163194	0.411823	-0.213349	0.123723
Acc00660.1	214.308	-0.498206	0.720427	-0.710476	0.0241175	-0.614508	0.00990393
Acc00661.1	0.984067	-0.421725	0.999954	0.196462	0.937948	-1.20916	0.285473
Acc00662.1	90.248	0.376081	0.424752	0.102795	0.6787	0.511226	0.00150878
Acc00663.1	16.5528	-0.040584	0.999954	-1.38137	0.0114588	-0.218016	0.692753
Acc00664.1	1.16233	-0.442625	0.999954	-0.717898	0.710576	-1.09133	0.294449
Acc00665.1	79.0459	0.17035	0.999954	0.388464	0.0568533	0.360185	0.0246946
Acc00666.1	39.8098	0.176515	0.999954	-0.40164	0.137221	-0.811763	5.25023e-07
Acc00667.1	4217.29	-0.139611	0.999954	-0.538773	0.0742462	-0.365372	0.125771
Acc00668.1	2.37185	-0.679345	0.999954	0.235092	0.897636	-1.10827	0.0737322
Acc00669.1	4.65478	0.364425	0.999954	-0.799901	0.582144	-1.48641	0.260862
Acc00670.1	304.271	0.662865	0.412154	-0.170196	0.669447	1.04765	2.44682e-06
Acc00671.1	316.661	0.0233631	0.999954	-0.0916248	0.409417	-0.0317913	0.743067
Acc00672.1	25.3515	-0.184933	0.999954	-0.183415	0.568671	-0.072663	0.785022
Acc00673.1	30.1118	0.177271	0.999954	0.24704	0.46124	0.438817	0.0419824
Acc00674.1	190.681	-0.0136492	0.999954	-0.124879	0.525721	-0.149265	0.280721
Acc00675.1	251.682	-0.0246099	0.999954	-0.238386	0.393621	-0.691739	0.000103127
Acc00676.1	1.9687	0.177258	0.999954	-1.66212	0.0970479	-0.0790408	0.962905
Acc00677.1	0.0296633	0.00156272	0.999954	-0.134077	NA	-0.0805587	NA
Acc00678.1	0.417874	0.153781	0.999954	-0.230801	NA	-1.14798	NA
Acc00679.1	86.3691	0.127209	0.999954	-0.30873	0.0422895	0.175446	0.1672
Acc00680.1	1.36954	0.625895	0.999954	-0.92195	0.697144	-0.0805601	0.96568
Acc00682.1	118.902	0.13624	0.999954	-0.00161409	0.9957	-0.294447	0.0203702
Acc00683.1	0	NA	NA	NA	NA	NA	NA
Acc00684.1	1.52964	2.07604	0.713512	-0.566504	0.807267	-0.789484	0.312186
Acc00685.1	0	NA	NA	NA	NA	NA	NA
Acc00686.1	85.9887	0.112569	0.999954	0.203412	0.480117	0.413032	0.0238205
Acc00687.1	0	NA	NA	NA	NA	NA	NA
Acc00688.1	54.6533	0.150897	0.999954	0.51604	0.15151	0.682179	0.00696142
Acc00689.1	29.344	0.0339669	0.999954	-0.556107	0.217453	-1.14423	0.00283559
Acc00690.1	0	NA	NA	NA	NA	NA	NA
Acc00691.1	6.78874	0.0734668	0.999954	0.702648	0.300385	0.437088	0.507019	AT2G25180.1	Two-component response regulator ARR12	ARR	ARR12
Acc00692.1	314.212	0.148772	0.999954	-0.299461	0.171424	-0.670089	9.19253e-06
Acc00693.1	4.36549	-0.0870378	0.999954	-0.662858	0.421029	-1.09834	0.0369005
Acc00694.1	0.17715	-0.860426	0.999954	0.231813	NA	0.280112	NA
Acc00695.1	0.819153	-0.121389	0.999954	1.33793	0.500077	0.707029	0.647236
Acc00696.1	2.26372	-0.318905	0.999954	0.571606	0.558917	1.52368	0.0281436
Acc00697.1	336.509	0.0724735	0.999954	-0.414417	0.0132665	0.242974	0.074722
Acc00698.1	6.56608	0.101472	0.999954	0.708109	0.249552	0.726925	0.110298
Acc00699.1	185.243	0.112049	0.999954	1.22038	2.07187e-07	1.05551	4.72001e-07
Acc00700.1	3.96877	0.767968	0.8155	-0.102152	0.931383	0.0401449	0.966988
Acc00701.1	722.219	-0.128887	0.999954	-0.711316	0.00079539	-0.835076	3.10679e-07
Acc00702.1	302.73	-0.206207	0.934504	-0.102231	0.657894	-0.344439	0.0114071
Acc00703.1	28.6005	-0.0596837	0.999954	-0.04153	0.912711	-0.0914452	0.688004
Acc00704.1	276.948	-0.19881	0.65235	-0.073487	0.62177	-0.480769	2.68425e-08
Acc00705.1	0.989007	-0.691664	0.999954	1.73406	0.318627	0.280113	0.87544
Acc00706.1	495.276	0.107215	0.999954	-0.440982	0.0132658	-0.132383	0.407691
Acc00707.1	0.242661	-0.808618	0.999954	-0.0978556	NA	-0.08056	NA
Acc00708.1	71.8076	0.0253199	0.999954	0.356983	0.0945778	0.168451	0.338071
Acc00709.1	110.66	0.00744682	0.999954	0.109878	0.646623	0.540536	0.000345108
Acc00710.1	31.8099	-0.0464845	0.999954	0.29877	0.302495	0.302412	0.122223
Acc00711.1	43.5621	0.163264	0.999954	0.396818	0.534877	0.0951861	0.862291
Acc00712.1	1.0984	1.39056	0.968072	-1.94617	0.119246	-0.958206	0.452151
Acc00713.1	1.02339	-0.645545	0.999954	1.59242	0.347611	1.80413	0.126478
Acc00715.1	393.989	-0.0299088	0.999954	0.0619534	0.699184	0.0560367	0.627358
Acc00716.1	0	NA	NA	NA	NA	NA	NA
Acc00717.1	0	NA	NA	NA	NA	NA	NA
Acc00718.1	64.3259	0.0884068	0.999954	-0.2648	0.163457	-0.364359	0.0108738
Acc00719.1	68.6901	0.0442493	0.999954	0.0640282	0.828329	-0.270986	0.0940568
Acc00720.1	0	NA	NA	NA	NA	NA	NA
Acc00721.1	8.34585	-0.355652	0.999954	-0.347399	0.483461	0.949629	0.0370248
Acc00722.1	0.0158457	0.00765412	0.999954	-0.142602	NA	-0.0805587	NA
Acc00723.1	41.6653	-0.040643	0.999954	0.106533	0.763457	0.451365	0.0201523
Acc00724.1	0.952255	-0.221548	0.999954	-1.84043	0.245355	-0.412743	0.799401
Acc00725.1	69.7689	0.315638	0.993358	0.342343	0.349751	0.242186	0.379774
Acc00726.1	23.0332	-0.0622366	0.999954	0.416071	0.297958	-0.0552223	0.884395
Acc00727.1	84.0858	0.0216133	0.999954	0.387191	0.0342866	0.0842324	0.599216
Acc00728.1	59.3105	-0.193611	0.999954	0.161823	0.542535	-0.184462	0.317872
Acc00729.1	0.146819	0.480425	0.999954	0.349665	NA	0.640783	NA
Acc00730.1	104.481	-0.162991	0.999954	0.0732277	0.825351	0.079049	0.736863
Acc00731.1	0.143661	0.893491	0.999954	-0.733569	NA	-0.441231	NA
Acc00732.1	11.0128	0.243297	0.999954	1.11342	0.0325164	2.79511	9.87818e-07
Acc00733.1	0.14149	-0.340882	0.999954	-0.159596	NA	1.63857	NA
Acc00734.1	45.6002	-0.0982959	0.999954	-0.167087	0.556779	0.120632	0.569393
Acc00735.1	0	NA	NA	NA	NA	NA	NA
Acc00737.1	0.111147	1.26253	0.999954	-0.188873	NA	-0.080559	NA
Acc00738.1	4.31693	0.0875285	0.999954	-0.131955	0.899115	-0.763622	0.202188
Acc00739.1	0	NA	NA	NA	NA	NA	NA
Acc00740.1	148.714	-0.0233789	0.999954	0.125976	0.607094	0.451976	0.00152157
Acc00742.1	0	NA	NA	NA	NA	NA	NA
Acc00743.1	383.007	-0.135239	0.999954	1.6027	4.95786e-05	0.765758	0.0312801
Acc00744.1	53.8559	0.0139036	0.999954	-0.342348	0.13719	-0.705138	2.3154e-05
Acc00745.1	155.034	0.195373	0.8155	-0.132386	0.435386	0.012601	0.939177
Acc00746.1	0.177749	1.31427	0.999954	0.566659	NA	-1.16258	NA
Acc00747.1	34.3074	0.568178	0.894541	1.39558	0.12919	1.55502	0.207959
Acc00748.1	20.9824	0.0747471	0.999954	-0.218745	0.560775	-0.631922	0.0481777
Acc00749.1	0	NA	NA	NA	NA	NA	NA
Acc00750.1	270.766	0.0901057	0.999954	0.327074	0.106101	0.541981	0.000297416
Acc00751.1	0.0407113	0.432901	0.999954	-0.160887	NA	-0.0805587	NA
Acc00752.1	113.155	0.00495816	0.999954	0.221142	0.249016	0.251018	0.0781263
Acc00753.1	0.0136759	0.40853	0.999954	-0.126762	NA	-0.0805587	NA
Acc00754.1	12.2077	0.180953	0.999954	1.24274	0.0506282	0.62783	0.143999	AT4G31920.1	Two-component response regulator ARR10	ARR	ARR10
Acc00755.1	120.85	0.3054	0.998271	-0.149618	0.727073	-0.67946	0.00369932
Acc00756.1	121.528	0.0115585	0.999954	-0.251075	0.162106	-0.544213	1.20942e-05
Acc00757.1	3.76259	0.271638	0.999954	0.741045	0.352766	1.14234	0.0531341
Acc00758.1	4.94602	0.521081	0.999954	-0.121321	0.901843	-0.0468561	0.949786
Acc00759.1	146.897	-0.0946644	0.999954	-0.192169	0.187892	-0.0481335	0.708884
Acc00760.1	359.425	0.0455884	0.999954	0.037543	0.830856	-0.19917	0.0473618
Acc00761.1	151.498	0.0742819	0.999954	-0.273047	0.451485	-0.837174	0.000227502
Acc00762.1	27.5134	-0.407238	0.736461	-0.140768	0.685583	-0.287721	0.219702
Acc00763.1	272.898	-0.0164788	0.999954	-0.0946145	0.599504	-0.0983107	0.46002
Acc00764.1	2691.24	0.176407	0.999954	-1.54802	3.34406e-05	-1.25244	2.65282e-05
Acc00765.1	311.264	0.0362205	0.999954	-0.202775	0.407208	0.149847	0.413006
Acc00766.1	1.16069	0.556663	0.999954	0.0187366	0.995231	-0.0805601	0.96568
Acc00767.1	0.383216	0.540459	0.999954	-0.599994	NA	-0.735168	NA
Acc00769.1	162.491	-0.0381578	0.999954	1.59485	7.04003e-06	0.762562	0.00848484
Acc00770.1	0.298314	0.883415	0.999954	0.23488	NA	-0.08056	NA			EXPA	EXP9
Acc00771.1	90.3731	0.0160624	0.999954	-0.0651124	0.833649	-0.251714	0.151076
Acc00593.1	4.78876	0.293623	0.999954	-0.0581396	0.952764	-0.610027	0.265277
Acc00594.1	13.3038	0.315757	0.999954	0.596109	0.259091	0.824439	0.0133934
Acc00595.1	0.387207	0.0617751	0.999954	0.714226	NA	-0.441233	NA
Acc00596.1	42.4163	0.0776039	0.999954	-0.189728	0.53923	-0.970369	7.28181e-07
Acc00597.1	103.652	0.0288456	0.999954	0.195772	0.292749	0.0237536	0.895585
Acc00598.1	0.0146961	-0.00453042	0.999954	-0.125544	NA	0.280108	NA
Acc00600.1	0.172761	1.5068	0.999954	-0.163008	NA	-0.0805598	NA
Acc00601.1	68.6391	0.168424	0.999954	0.169724	0.754892	0.597438	0.0530974
Acc00602.1	3.83624	0.0616528	0.999954	0.464958	0.614923	0.0528033	0.943029
Acc00604.1	37.5419	0.524898	0.638248	-0.135029	0.731147	0.402654	0.0741059
Acc00605.1	0.171115	0.503441	0.999954	0.173173	NA	-0.441232	NA
Acc00606.1	1.76554	0.674973	0.999954	1.60161	0.358087	2.14169	0.0715494
Acc00607.1	204.918	0.317461	0.759677	-0.730015	0.000190959	-0.0116567	0.965614
Acc00608.1	32.2929	-0.238296	0.998598	-0.140716	0.643497	-0.412623	0.0245484
Acc00609.1	6.40748	-0.567415	0.999954	-0.722359	0.198663	0.892392	0.118904
Acc00611.1	114.512	-0.242649	0.85452	0.252187	0.173815	0.399951	0.00255889
Acc00612.1	1.73158	0.973141	0.999954	-0.247948	0.875816	1.0086	0.250557
Acc00613.1	3.55632	-0.270502	0.999954	0.776452	0.454521	1.12425	0.115357
Acc00614.1	479.918	0.0687788	0.999954	-0.276976	0.000170619	-0.0169603	0.843261
Acc00615.1	180.424	-0.0497444	0.999954	-0.371114	0.096156	-0.659891	2.71611e-05
Acc00616.1	61.502	0.0240814	0.999954	0.485989	0.0489852	0.601352	0.00164259
Acc00617.1	0.806117	-0.665557	0.999954	-1.53835	0.443981	-0.104782	0.954653
Acc00618.1	57.0305	-0.141695	0.999954	0.166044	0.54774	-0.172056	0.37715
Acc00619.1	71.435	0.105354	0.999954	0.366853	0.0688979	0.531074	0.000830913
Acc00620.1	23.4177	0.0236031	0.999954	0.0882592	0.829863	-0.0836914	0.758297
Acc00621.1	155.504	-0.0878473	0.999954	0.0277926	0.923099	0.0463388	0.800953
Acc00622.1	126.518	-0.0885983	0.999954	-0.139337	0.602371	-0.18636	0.293434
Acc00623.1	17.706	-0.227114	0.999954	0.362312	0.388101	0.00728124	0.982486
Acc00624.1	30.3497	-0.112336	0.999954	0.298857	0.249449	0.409997	0.0227753
Acc00625.1	0.112701	-0.290873	0.999954	-0.0853388	NA	-0.801896	NA
Acc00626.1	0	NA	NA	NA	NA	NA	NA
Acc00627.1	0.0269459	0.00156272	0.999954	-0.134077	NA	0.280108	NA
Acc00628.1	1.81594	-0.354822	0.999954	0.337322	0.818698	1.50556	0.0905994
Acc00629.1	138.009	0.185447	0.859173	-0.425943	0.000862656	0.0688061	0.582514
Acc00630.1	0	NA	NA	NA	NA	NA	NA
Acc33732.1	24.5728	0.107171	0.999954	-0.468533	0.204597	0.221137	0.478438
Acc00772.1	15.684	-0.114359	0.999954	0.973764	0.0541605	0.923425	0.00963146
Acc00773.1	41.6802	0.0267061	0.999954	0.509235	0.0215985	0.375134	0.0756892
Acc00774.1	243.388	-0.0110101	0.999954	-0.156706	0.463542	-0.578835	1.82396e-05
Acc00775.1	208.092	-0.497946	0.881467	-1.00242	0.0075053	-0.355299	0.285292
Acc00776.1	7.91803	0.197857	0.999954	0.218258	0.740673	-0.462078	0.420733
Acc00777.1	78.6225	-0.131681	0.999954	0.167557	0.471253	-0.0763681	0.659065
Acc00778.1	164.286	-0.0594334	0.999954	-0.145697	0.226827	0.013972	0.908304
Acc00779.1	0	NA	NA	NA	NA	NA	NA
Acc00780.1	0.164807	-0.723438	0.999954	-1.28311	NA	-1.16258	NA
Acc00781.1	0	NA	NA	NA	NA	NA	NA
Acc00782.1	0.507657	1.92101	0.999954	-0.715328	NA	0.280113	NA
Acc00783.1	0.152836	-0.260564	0.999954	-0.127776	NA	-0.0805598	NA
Acc00784.1	113.585	-0.129737	0.999954	-0.0156513	0.944438	0.20375	0.0917256
Acc00785.1	204.381	-0.227939	0.863861	-0.131866	0.529309	-0.418229	0.000946741
Acc00786.1	786.92	0.0735014	0.999954	-0.243284	0.0838994	0.114104	0.335111
Acc00787.1	2128.01	-0.338413	0.667662	0.382183	0.0600631	0.401712	0.00861886
Acc00788.1	282.9	-0.0424362	0.999954	0.013859	0.969914	-0.159775	0.414338
Acc00789.1	2.91612	0.0673901	0.999954	0.39623	0.664239	1.13923	0.233327
Acc00790.1	267.665	0.014728	0.999954	-0.448101	0.00574549	0.140757	0.331425
Acc00791.1	0.0283656	0.426807	0.999954	-0.15235	NA	-0.0805587	NA
Acc00792.1	48.174	0.246928	0.999954	1.39353	0.00513382	1.66881	1.01766e-05
Acc00793.1	32.384	-0.157123	0.999954	-0.00880683	0.987309	0.0963968	0.834172
Acc00794.1	0.263268	0.0327525	0.999954	0.0437173	NA	0.280113	NA
Acc00795.1	39.1589	0.407918	0.712599	0.0311564	0.942314	0.129127	0.640352
Acc00796.1	60.4762	-0.0927879	0.999954	-0.458633	0.0233322	-0.566888	4.65214e-05
Acc00797.1	452.025	-0.0796332	0.999954	-0.428445	0.00973497	-0.275557	0.0434296
Acc00798.1	61.5724	0.100415	0.999954	0.289418	0.506121	-0.261503	0.406055
Acc00799.1	0.012748	0.00765498	0.999954	-0.142606	NA	-0.0805587	NA
Acc00800.1	12.3749	-0.106481	0.999954	1.25627	0.00474848	0.719526	0.087714
Acc00801.1	157.1	0.184379	0.895749	-0.256815	0.0813844	0.00253708	0.984618
Acc00802.1	2.8182	0.644037	0.999954	0.654669	0.510574	0.851437	0.253803
Acc00803.1	32.6986	-0.347898	0.728476	-0.104634	0.750274	-0.215915	0.355224
Acc00804.1	14.0849	0.472051	0.999954	1.2719	0.0604852	2.94055	4.20867e-09
Acc00805.1	0.837185	0.590068	0.999954	-0.645859	0.724266	-2.67638	0.0323554
Acc00806.1	0.14771	-1.19929	0.999954	0.59277	NA	-0.0805597	NA
Acc00807.1	313.426	0.172614	0.968072	-0.273106	0.0906158	-0.422931	0.000191514
Acc00808.1	0.073172	-0.00453042	0.999954	0.956458	NA	0.280108	NA
Acc00809.1	12.9146	0.405427	0.999954	0.313574	0.529216	-0.0880999	0.812199
Acc00810.1	0.0257758	-0.010621	0.999954	-0.117023	NA	-0.0805587	NA
Acc00811.1	0	NA	NA	NA	NA	NA	NA
Acc00812.1	0.0285309	-0.346921	0.999954	-0.151131	NA	0.280108	NA
Acc00813.1	0.292502	0.201719	0.999954	-0.355065	NA	-0.0805601	NA
Acc00814.1	0.1552	-0.28722	0.999954	-0.0183179	NA	0.280112	NA
Acc00815.1	265.868	0.121787	0.999954	-1.13271	0.00638089	-0.681656	0.0466381
Acc00816.1	44.3801	0.0623699	0.999954	0.070098	0.816219	-0.0872594	0.689539
Acc00817.1	63.8042	-0.164667	0.999954	-0.262369	0.249552	-0.0473956	0.839396
Acc00818.1	174.063	0.496134	0.65235	0.0946433	0.824046	-0.208045	0.468174
Acc00819.1	8.38323	0.382982	0.999954	-1.60671	0.0105606	-1.94556	5.72504e-06
Acc00820.1	0.078916	0.454834	0.999954	-0.119463	NA	-0.0805588	NA
Acc00821.1	38.9881	-0.126772	0.999954	0.220125	0.390494	0.332011	0.0818705
Acc00822.1	32.9213	-0.0282507	0.999954	1.5925	0.00021633	0.871763	0.116704
Acc00823.1	0.202702	0.0499411	0.999954	1.89834	NA	-0.0805599	NA
Acc00824.1	123.396	-0.0954223	0.999954	-0.16139	0.304321	-0.191987	0.0907502
Acc00825.1	84.7734	0.156782	0.999954	0.055948	0.923315	-0.0950193	0.804043
Acc00826.1	116.927	-0.17413	0.999954	-0.257821	0.25032	-0.757611	1.21535e-06
Acc00827.1	98.0115	-0.00176874	0.999954	-0.0308334	0.93494	-0.115138	0.625992
Acc00828.1	19.43	-0.124507	0.999954	-0.696186	0.0739156	0.633965	0.0259083
Acc00829.1	0.0574047	0.0137481	0.999954	-0.151139	NA	-0.0805587	NA
Acc00830.1	2.74859	-0.12218	0.999954	-1.21201	0.373443	-0.801907	0.60292
Acc00831.1	6.8994	0.292618	0.999954	0.431724	0.638402	1.16892	0.0213859
Acc00832.1	2.2692	1.15094	0.713322	-1.05615	0.498917	0.221645	0.894321
Acc00833.1	119.26	-0.140617	0.999954	0.57102	0.0127334	0.76167	2.86745e-05
Acc00834.1	73.2779	0.246557	0.999954	0.470643	0.381777	0.294641	0.478803
Acc00835.1	0.389009	-0.117566	0.999954	0.743175	NA	-0.0805601	NA
Acc00836.1	1.80472	0.235488	0.999954	-0.830394	0.64632	-0.0805601	0.96568
Acc00837.1	107.448	0.0742969	0.999954	-0.360057	0.0261182	-0.200551	0.126441
Acc00838.1	0	NA	NA	NA	NA	NA	NA
Acc00839.1	386.653	-0.0166076	0.999954	-0.426417	0.00266801	-0.145614	0.251887
Acc00840.1	58.1409	-0.118904	0.999954	-0.354209	0.0616005	-0.413153	0.00290789
Acc00841.1	277.337	-0.118705	0.999954	-0.398605	0.0386252	-0.405548	0.00576395
Acc00842.1	184.338	-0.261634	0.648788	0.23647	0.139147	-0.183739	0.15381
Acc00843.1	90.118	-0.0642207	0.999954	0.218813	0.269603	-0.159217	0.30056
Acc00844.1	3.0422	0.290637	0.999954	0.232075	0.887455	-0.279764	0.830457
Acc00845.1	0	NA	NA	NA	NA	NA	NA
Acc00846.1	48.5791	0.0361598	0.999954	-0.150003	0.723733	-0.227278	0.389313
Acc00847.1	0.366535	0.575872	0.999954	-0.554962	NA	-0.0805601	NA
Acc00848.1	14.261	0.437481	0.985069	-0.468487	0.248094	0.084616	0.817161
Acc00849.1	439.387	-0.00630127	0.999954	0.74745	0.00631461	1.0112	9.12372e-07
Acc00850.1	34.7028	-0.304922	0.886248	0.000376147	0.999647	-0.300728	0.136981
Acc00851.1	175.163	-0.315501	0.8155	-0.128222	0.667655	-0.725895	1.30671e-05
Acc00852.1	15.2912	-0.199162	0.999954	-0.0154841	0.980213	0.138227	0.745872
Acc00853.1	1.44862	0.483169	0.999954	0.220341	0.933969	-0.100367	0.949034
Acc00854.1	796.799	0.135038	0.999954	0.459547	0.201545	1.24427	4.25759e-07
Acc00855.1	20.7978	-0.00283266	0.999954	0.504281	0.127773	0.279467	0.272618
Acc00856.1	1106.19	0.0196754	0.999954	-0.124469	0.147658	-0.0359229	0.642238
Acc00857.1	0.0129385	-0.365198	0.999954	-0.125544	NA	-0.0805587	NA
Acc00858.1	0.409579	0.658918	0.999954	-0.165198	NA	0.640787	NA
Acc00859.1	139.851	-0.021648	0.999954	0.215501	0.19912	0.219098	0.0751434
Acc00860.1	0.381163	1.26271	0.999954	-0.351271	NA	-1.33252	NA
Acc00861.1	181.581	0.537793	0.859592	-0.826082	0.0406539	0.0232884	0.963602
Acc00862.1	101.335	0.0375832	0.999954	-0.0146096	0.954975	-0.0410736	0.800326
Acc00863.1	310.244	0.0696466	0.999954	-0.000931767	0.995931	0.0710829	0.432007
Acc00864.1	0.0270953	0.00156272	0.999954	-0.134077	NA	-0.0805587	NA
Acc00865.1	52.7746	-0.261214	0.753382	0.0891302	0.727858	0.222683	0.193987
Acc00866.1	1.11637	0.0257897	0.999954	0.960967	0.667943	1.37235	0.34741
Acc00867.1	0.0474802	-0.340829	0.999954	-0.15966	NA	-0.0805587	NA
Acc00868.1	651.174	-0.0222016	0.999954	-0.471368	0.0106249	-0.531074	0.000151555
Acc00869.1	0.166366	-1.37497	0.999954	-0.123025	NA	1.00145	NA
Acc00870.1	0.103108	-0.724648	0.999954	-0.704318	NA	1.00145	NA
Acc00871.1	0.63664	-0.951744	0.999954	0.388611	NA	-0.0805601	NA
Acc00872.1	253.243	-0.0201705	0.999954	-0.0980787	0.461366	0.12326	0.18713
Acc00873.1	137.239	-0.11769	0.999954	0.0215921	0.941965	-0.40323	0.00534127
Acc00874.1	148.891	0.0701978	0.999954	1.05629	0.000664471	1.42351	2.46859e-09
Acc00875.1	29.3923	0.0116147	0.999954	0.159673	0.561702	0.543272	0.00631688
Acc00876.1	228.198	-0.076397	0.999954	-0.0953807	0.572994	-0.371223	0.000309011
Acc00879.1	1.29552	0.945362	0.999954	-1.48745	0.375586	0.468484	0.633201
Acc00880.1	0.335867	-0.811216	0.999954	-0.568843	NA	-0.0805601	NA
Acc00881.1	2.32441	-0.261797	0.999954	-0.57456	0.522214	1.6492	0.0681903
Acc00882.1	1789.81	0.090751	0.999954	-0.480783	0.0617852	-0.0356083	0.89569
Acc00883.1	45.3526	-0.0232327	0.999954	-0.0382916	0.922431	0.140707	0.529402
Acc00884.1	68.6812	0.0112448	0.999954	-0.219106	0.266065	0.0459503	0.783947
Acc00885.1	0	NA	NA	NA	NA	NA	NA
Acc00886.1	101.619	0.0470626	0.999954	0.129328	0.522616	0.190182	0.202363
Acc00887.1	12.1676	0.175972	0.999954	-0.278888	0.523084	-0.199679	0.574741
Acc00888.1	455.666	0.216488	0.999954	1.80765	0.000536335	4.97978	1.58793e-33
Acc00889.1	29.3022	0.060255	0.999954	0.00266073	0.9957	0.188594	0.458808
Acc00890.1	0.0889952	-0.359106	0.999954	-0.134074	NA	-0.0805589	NA
Acc00891.1	74.4299	0.257	0.999954	0.0102001	0.990387	-0.641195	0.0829386
Acc00892.1	10.0121	0.56359	0.886248	-0.287354	0.50505	-0.379821	0.377917
Acc00893.1	1.02992	0.701905	0.999954	0.457813	0.802495	-0.175621	0.90291
Acc00894.1	679.385	-0.553419	0.647325	-0.639474	0.0429797	-0.697475	0.00344017
Acc00895.1	0.369682	1.21029	0.999954	0.944853	NA	-0.0805601	NA
Acc00896.1	20.0896	0.171267	0.999954	0.0466818	0.948801	1.62697	5.09207e-05
Acc00897.1	26.8142	0.0945569	0.999954	-0.280299	0.387145	-0.566854	0.00826502
Acc00898.1	42.3294	-0.238483	0.999954	-0.0525861	0.908295	-0.392062	0.0988915
Acc00899.1	152.38	0.00768685	0.999954	-0.0682602	0.830975	-0.447591	0.00786978
Acc00900.1	94.1062	-0.188593	0.999954	0.399773	0.0764761	0.111807	0.57997
Acc00901.1	117.972	0.0863345	0.999954	0.168802	0.417611	0.495792	0.000395854
Acc00902.1	79.502	0.427461	0.885265	1.53239	4.47221e-07	1.50092	2.50282e-07
Acc00903.1	46.9202	-0.187293	0.999954	-0.157693	0.603183	0.00719061	0.973308
Acc00904.1	98.7152	-0.0384162	0.999954	0.171331	0.286185	0.198234	0.0948238
Acc00905.1	206.493	0.0977628	0.999954	-0.175027	0.233352	-0.226747	0.0375241
Acc00906.1	516.898	-0.0977417	0.999954	-0.822716	3.50367e-05	-0.924605	2.66569e-09
Acc00907.1	56.3384	-0.0874282	0.999954	-0.0815018	0.758717	-0.0704346	0.693954
Acc00908.1	25.3855	0.0799666	0.999954	2.39666	0.0333693	2.24282	0.0333357
Acc00909.1	282.032	-0.0318658	0.999954	-0.543751	1.82768e-06	-0.265493	0.00601228
Acc00910.1	0.239749	-1.39878	0.999954	-0.0091966	NA	1.00146	NA
Acc00911.1	170.693	-0.161747	0.998598	0.208874	0.244218	0.184806	0.167675
Acc00912.1	107.988	-0.317444	0.971039	0.146333	0.71868	-0.36577	0.131721
Acc00913.1	96.7135	-0.192793	0.934504	-0.0505319	0.836279	-0.157257	0.266168
Acc00914.1	86.9151	0.0525563	0.999954	0.374861	0.165887	0.726179	7.58223e-05
Acc00915.1	25.6172	0.270701	0.999954	0.337447	0.373991	0.669519	0.0059517
Acc00916.1	116.509	-0.0095699	0.999954	-0.389312	0.0503062	-0.312106	0.0520605
Acc00917.1	0	NA	NA	NA	NA	NA	NA
Acc00918.1	226.753	-0.0107247	0.999954	0.336107	0.0523035	0.334372	0.0183982
Acc00919.1	100.168	0.0773759	0.999954	0.240902	0.297586	0.19547	0.27501
Acc00920.1	8.52641	0.0974254	0.999954	-0.00930071	0.991762	-1.04762	0.0406231
Acc00921.1	12.9936	0.17593	0.999954	1.3315	0.00666042	0.726121	0.128635
Acc00922.1	239.33	-0.156415	0.999954	-0.143261	0.642057	-0.281086	0.149832
Acc00923.1	406.309	-0.150986	0.999954	-0.371584	0.092913	-0.629236	6.42503e-05
Acc00924.1	1.09227	0.719135	0.999954	1.67213	0.354872	1.05955	0.419853
Acc00925.1	143.309	0.12077	0.999954	-0.787477	5.92285e-08	-0.338282	0.00891112
Acc00926.1	44.9373	0.0789173	0.999954	0.835201	0.0452281	0.030009	0.949819
Acc00927.1	75.6072	-0.397887	0.454513	0.254968	0.210045	-0.168865	0.29469
Acc00928.1	83.9445	0.153279	0.999954	0.0970278	0.729341	-0.0914039	0.649063
Acc00929.1	107.066	0.221364	0.970438	0.642035	0.00331425	0.415111	0.0214409
Acc00930.1	10.7239	0.175589	0.999954	-0.109537	0.897348	0.09976	0.899692
Acc00931.1	634.96	-0.109353	0.999954	-0.284332	0.0360399	0.00938386	0.954863
Acc00932.1	2.03418	-0.42688	0.999954	0.428983	0.738405	0.303711	0.723562
Acc00933.1	54.0509	-0.170228	0.999954	0.0334627	0.917844	0.0271636	0.901658
Acc00934.1	94.2115	-0.0590931	0.999954	-0.187405	0.296594	-0.146128	0.302887
Acc00936.1	0	NA	NA	NA	NA	NA	NA	AT5G56970.1	Cytokinin dehydrogenase 3 (AtCKX3), Precursor (putative)	CKX	CKX3.1
Acc00937.1	0.799159	-1.23678	0.999954	-1.31824	0.464107	0.834526	0.590688
Acc00938.1	0.97654	0.39683	0.999954	-1.7494	0.357266	0.280113	0.878336
Acc00939.1	14.7512	0.228915	0.999954	-0.758703	0.0349953	-0.00267205	0.993938
Acc00940.1	7.66723	-0.444573	0.999954	-0.463429	0.424934	0.530236	0.285442
Acc00941.1	45.6142	-0.215332	0.999954	-0.125048	0.750395	0.198681	0.467638
Acc00942.1	180.247	-0.232514	0.953891	-0.102981	0.711343	-0.580831	0.00016137
Acc00944.1	3.73499	0.675845	0.999954	0.17566	0.916124	-0.98755	0.320146
Acc00945.1	3.69151	0.17975	0.999954	0.060834	0.953345	0.441653	0.485081
Acc00946.1	2.26502	0.318646	0.999954	1.52697	0.154197	0.402854	0.777627
Acc00947.1	334.923	0.181592	0.999954	0.384779	0.102391	-0.288894	0.113694
Acc00948.1	197.189	-0.00892708	0.999954	0.158448	0.479763	0.229181	0.185224
Acc00949.1	13.2632	0.165573	0.999954	0.243832	0.661148	0.94055	0.00168789
Acc00950.1	0.271736	-0.665153	0.999954	0.233318	NA	0.640786	NA
Acc00951.1	181.64	-0.0791869	0.999954	-0.0545954	0.778878	0.333591	0.00270114
Acc00952.1	0.904945	0.122651	0.999954	2.63268	0.268543	3.61561	0.0240678
Acc00953.1	176.323	0.141376	0.999954	-0.0187303	0.956402	0.302409	0.077534
Acc00954.1	0.540026	0.158427	0.999954	1.58461	NA	1.00454	NA
Acc00955.1	464.628	-0.0097211	0.999954	0.0651246	0.73671	-0.0839534	0.515583
Acc00956.1	0.791075	1.04922	0.999954	-0.530066	0.800418	2.56474	0.0248538
Acc00957.1	0.634746	0.457366	0.999954	-0.193334	NA	-0.441234	NA
Acc00958.1	95.2432	-1.7513	0.997203	-2.86176	0.00145843	0.979468	0.214906
Acc00959.1	68.8637	0.0455479	0.999954	1.02309	0.0444694	-1.63575	9.65844e-05
Acc00960.1	80.0116	0.254713	0.999954	0.147305	0.713307	-0.214773	0.45166
Acc00961.1	120.725	0.0151703	0.999954	-0.298389	0.504725	0.0883543	0.826013
Acc00962.1	115.521	0.0776234	0.999954	0.29082	0.085787	0.0141274	0.94997
Acc00963.1	94.984	0.0839475	0.999954	-0.335426	0.140831	0.00103146	0.995841
Acc00964.1	77.4799	0.0205698	0.999954	0.263597	0.185695	0.146351	0.40159
Acc00965.1	36.3303	0.184399	0.999954	0.113267	0.791734	-0.189238	0.488174
Acc00966.1	92.7651	0.245708	0.999954	-0.151291	0.788359	0.178656	0.649961
Acc00967.1	1280.8	-0.203277	0.524961	-0.133693	0.232897	-0.152282	0.0593692
Acc00968.1	62.3297	0.119889	0.999954	0.559407	0.146126	-0.251222	0.444022
Acc00969.1	0.0524341	0.414622	0.999954	0.94671	NA	-0.0805587	NA
Acc00970.1	9.16764	0.530473	0.999954	0.615569	0.6787	1.1782	0.193192
Acc00971.1	280.331	-0.104728	0.999954	-0.176277	0.211626	-0.345544	0.000327995
Acc00972.1	171.247	0.15834	0.999954	0.798206	4.4946e-06	0.615693	1.13397e-05
Acc00973.1	27.1297	-0.110556	0.999954	-0.0949504	0.831447	-0.511971	0.0406002
Acc00974.1	510.662	0.0612789	0.999954	-0.160866	0.408495	0.22871	0.0858437
Acc00975.1	181.027	0.00574674	0.999954	0.16905	0.429515	-0.0484602	0.792991
Acc00976.1	0.0161069	-0.00453042	0.999954	-0.125544	NA	-0.0805587	NA
Acc00977.1	1.0681	1.07181	0.969771	-0.569901	0.815306	-0.0805601	0.96568
Acc00978.1	102.531	-0.130903	0.999954	0.536407	0.0134717	0.542654	0.000660965
Acc00979.1	164.892	-0.217913	0.885265	0.132436	0.53061	0.0159616	0.934426
Acc00980.1	265.279	-0.0752429	0.999954	-0.311998	0.108327	-0.431277	0.00246312
Acc00981.1	5.32631	-0.0312672	0.999954	-0.270237	0.710275	-0.58063	0.324685
Acc00982.1	1242.55	-0.0290589	0.999954	-0.137449	0.415993	0.284827	0.00966091
Acc00983.1	17.7018	0.0373005	0.999954	0.352123	0.390469	0.525851	0.162308
Acc00984.1	25.7504	0.145595	0.999954	2.22744	0.000933559	-1.90407	0.000225973
Acc00985.1	1303.61	-0.151572	0.753382	-0.0867304	0.472697	-0.345957	2.7003e-06
Acc00986.1	0.194718	0.471195	0.999954	-0.358757	NA	-0.441232	NA
Acc00987.1	920.879	0.295324	0.886595	-0.10559	0.738204	0.178162	0.376942
Acc00989.1	172.847	0.14885	0.999954	-0.434914	0.0172244	-0.339064	0.0190243
Acc00990.1	0.0320699	0.00156185	0.999954	-0.134073	NA	-0.801893	NA
Acc00991.1	10.3353	0.0850893	0.999954	0.45196	0.376933	-0.159907	0.728314
Acc00992.1	13.2741	-0.313311	0.999954	0.0582068	0.916207	-0.223772	0.532792
Acc00993.1	52.1509	0.116385	0.999954	-0.127943	0.602371	-0.456025	0.00242411
Acc00994.1	38.3399	-0.27678	0.797382	0.134431	0.682576	-0.00630637	0.979192
Acc00995.1	18.2639	-0.0926757	0.999954	-0.0913374	0.882559	-0.0891486	0.830982
Acc00996.1	12.7198	0.110902	0.999954	0.119899	0.905158	0.998874	0.487983
Acc00997.1	115.673	0.0587579	0.999954	-0.154941	0.444973	0.066523	0.70504
Acc00998.1	3.40285	0.182194	0.999954	-0.566147	0.661994	0.402965	0.774268
Acc00999.1	0.379257	0.0040506	0.999954	-0.13756	NA	0.640777	NA
Acc01000.1	180.939	-0.106855	0.999954	0.246423	0.1301	0.288822	0.0147697
Acc01001.1	38.2178	-0.320478	0.858053	0.605732	0.0192238	0.405476	0.0447363
Acc01002.1	199.952	0.0268632	0.999954	0.34081	0.127264	-0.56029	0.000595007
Acc01003.1	84.3107	-0.203056	0.998644	0.673125	0.00124655	0.293419	0.109363
Acc01004.1	107.811	-0.205855	0.808048	0.0341421	0.881746	-0.242202	0.0428135
Acc01005.1	1058.88	0.0895333	0.999954	-0.315395	0.465766	-1.17958	8.27891e-06
Acc01006.1	2.23443	0.253493	0.999954	0.0432801	0.981873	1.95143	0.0668337
Acc01007.1	375.012	-0.23788	0.470699	0.0321231	0.846216	-0.00843854	0.951635
Acc01008.1	173.8	-0.0380648	0.999954	0.108008	0.616449	0.287855	0.031021
Acc01009.1	1108.79	0.213714	0.999954	-0.545206	0.130426	-0.983603	0.000106244
Acc01010.1	8.20269	-0.0220123	0.999954	-0.0405639	0.952982	0.170765	0.732236
Acc01011.1	3.63455	0.554827	0.999954	-0.259734	0.755455	-1.4715	0.0103728
Acc01012.1	13.3383	-0.119292	0.999954	0.559489	0.219418	-0.429501	0.262803
Acc01013.1	17.682	0.346674	0.999954	1.10661	0.0567993	1.25689	0.0398907
Acc01014.1	0.428103	2.74447	0.996104	0.749747	NA	-0.82693	NA
Acc01015.1	0.150089	2.02201	0.999954	0.0207183	NA	-0.0805597	NA
Acc01016.1	23.9999	0.0811596	0.999954	-0.14816	0.793116	0.702311	0.0255242
Acc01017.1	34.6709	0.160302	0.999954	0.0537076	0.93463	0.979643	0.00186625
Acc01018.1	81.5511	-0.00542017	0.999954	0.112662	0.732304	0.54873	0.00306107
Acc01019.1	2.35031	-0.380987	0.999954	2.2356	0.091645	-0.44894	0.706936
Acc01020.1	0	NA	NA	NA	NA	NA	NA
Acc01021.1	1.28014	0.263812	0.999954	2.57524	0.114366	1.0857	0.434907
Acc01022.1	4.63007	-0.249475	0.999954	2.07517	0.0265053	1.39005	0.00410235
Acc01023.1	0.0133097	0.40853	0.999954	-0.126762	NA	-0.0805587	NA
Acc01024.1	69.1289	0.0304784	0.999954	0.395884	0.0231905	0.132346	0.446026
Acc01025.1	95.8096	0.135368	0.999954	0.451599	0.0863926	-0.0638637	0.818097
Acc01027.1	3.0404	0.421338	0.999954	0.937333	0.782726	2.05157	0.235064
Acc01028.1	15.4682	0.0842879	0.999954	-0.510097	0.137221	0.252836	0.414964
Acc01029.1	21.9032	-0.121755	0.999954	-0.035098	0.938112	-0.236849	0.347779
Acc01030.1	77.6902	-0.0515351	0.999954	0.0492088	0.833348	-0.147735	0.320233
Acc01031.1	0.0289459	0.428025	0.999954	-0.731117	NA	-0.0805587	NA
Acc01032.1	71.3319	0.380078	0.962315	-0.689657	0.0439295	-0.325239	0.265935
Acc01033.1	22.6904	0.21966	0.999954	-0.0135295	0.97916	0.193816	0.454178
Acc01034.1	16.0362	0.221931	0.999954	0.951035	0.0530136	1.38264	6.41533e-05
Acc01035.1	45.5811	-0.0302236	0.999954	0.136778	0.699795	-0.322999	0.131847
Acc01036.1	69.118	-0.128908	0.999954	0.242398	0.44661	-0.119473	0.637489
Acc01037.1	104.545	-0.0990799	0.999954	-0.217277	0.279529	0.030829	0.870433
Acc01038.1	5760.79	0.0439913	0.999954	-0.637855	0.136582	-0.936351	0.00219215
Acc01039.1	240.377	-0.480577	0.971516	-1.2499	0.00377054	-1.68199	3.12382e-07
Acc01040.1	0	NA	NA	NA	NA	NA	NA
Acc01041.1	248.246	-0.0143379	0.999954	0.0284723	0.880028	-0.0693639	0.539637
Acc01042.1	6.58378	-0.0254452	0.999954	0.13427	0.876307	1.27162	0.00721645
Acc01043.1	45.5658	0.243757	0.934504	0.125143	0.659465	0.188069	0.306499
Acc01044.1	85.931	-0.395962	0.999954	-0.895748	0.0144903	-0.645379	0.0267691
Acc01045.1	2784.84	-0.21603	0.969388	-0.631155	0.000639056	-0.270536	0.0852681
Acc01046.1	169.374	0.0739409	0.999954	-0.0744258	0.651137	0.286468	0.00435162
Acc01047.1	107.123	0.141279	0.999954	0.329708	0.290109	0.65464	0.00387974
Acc01048.1	0.02866	-0.357887	0.999954	-0.71284	NA	-0.0805587	NA
Acc01049.1	0.0136759	0.40853	0.999954	-0.126762	NA	-0.0805587	NA
Acc01050.1	1.14797	0.562398	0.999954	-1.25726	0.385634	0.280113	0.873089
Acc01051.1	1.52091	0.572773	0.999954	-1.21256	0.490833	1.17321	0.375242
Acc01052.1	45.202	0.206602	0.999954	-0.498673	0.0741698	-0.481718	0.0273864
Acc01053.1	1.49749	0.931467	0.999954	-0.243039	0.914287	-1.22322	0.302966
Acc01054.1	242.139	-0.207238	0.934971	0.139135	0.510606	0.468909	0.000429671
Acc01055.1	113.008	-0.173957	0.971039	0.0452181	0.85789	-0.202013	0.126003
Acc01056.1	1.19871	0.981581	0.999954	-0.913743	0.575435	-1.21005	0.196134
Acc01057.1	30.3318	-0.0340004	0.999954	0.157913	0.699708	0.448104	0.0744147
Acc01058.1	11.9157	0.267751	0.999954	0.361221	0.411928	0.420471	0.199193
Acc01059.1	259.199	-0.143488	0.999954	0.440669	0.181432	0.42251	0.0809767
Acc01060.1	32.7469	0.0499597	0.999954	0.197067	0.507118	0.1273	0.594256
Acc01061.1	140.299	-0.112703	0.999954	0.112287	0.47167	-0.0189741	0.891255
Acc01062.1	39.2695	0.0466349	0.999954	0.113899	0.692598	-0.239745	0.20585
Acc01063.1	292.505	-0.0571685	0.999954	-0.501994	0.00980652	-0.583591	8.67588e-05
Acc01064.1	0.217769	-0.260611	0.999954	0.232963	NA	-1.51482	NA
Acc01065.1	166.222	-0.0650563	0.999954	-0.000771319	0.997254	-0.26008	0.0149619
Acc01066.1	56.1239	-0.0345617	0.999954	0.23065	0.29402	0.423559	0.00366102
Acc01067.1	64.4167	0.187982	0.999954	0.820403	0.0075214	1.16831	1.81441e-06
Acc01068.1	301.662	0.203715	0.874198	-0.212379	0.228467	-0.134645	0.348544
Acc01069.1	0	NA	NA	NA	NA	NA	NA
Acc01070.1	13.2114	0.365805	0.999954	-0.744808	0.236788	-1.71679	0.00020844
Acc01071.1	65.5692	0.217439	0.999954	0.369908	0.205248	0.39111	0.0588181
Acc01072.1	21.3048	0.755898	0.985069	2.82993	6.08599e-05	4.90849	3.18838e-07
Acc01073.1	19.2538	0.186013	0.999954	0.190522	0.651287	0.375142	0.161132
Acc01074.1	17.4448	-0.235949	0.999954	0.29042	0.601715	-0.540178	0.069154
Acc01075.1	0.364483	0.559732	0.999954	0.195459	NA	-0.0706563	NA
Acc01076.1	26.3006	-0.00512454	0.999954	-0.158315	0.678869	-0.31874	0.262732
Acc01077.1	661.856	-0.0126143	0.999954	-0.219197	0.022188	-0.220722	0.00258508
Acc01079.1	22.6359	-0.0526075	0.999954	-0.277588	0.430767	-0.371955	0.14749
Acc01080.1	97.7836	-0.128306	0.999954	-0.230752	0.253492	-0.457419	0.00060129
Acc01081.1	6.10608	0.355682	0.999954	0.178263	0.831386	-1.24395	0.307958
Acc01082.1	67.0556	-0.0532509	0.999954	0.262168	0.202701	0.298808	0.0494555
Acc01083.1	33.7184	0.194107	0.999954	-0.158389	0.621194	-0.767411	0.000626552
Acc01084.1	0.467995	-0.0026358	0.999954	0.953805	NA	1.31919	NA
Acc01085.1	467.848	-0.0290764	0.999954	0.00521914	0.98082	0.127159	0.24715
Acc01086.1	0.961233	0.973586	0.999954	-0.476175	0.816636	-1.67503	0.141774
Acc01087.1	296.623	0.142714	0.998598	-0.247676	0.099728	-0.180029	0.126441
Acc01089.1	54.3499	0.0508543	0.999954	0.1258	0.720933	0.230726	0.306312
Acc01090.1	4.9285	0.331535	0.999954	-0.820631	0.55462	0.494549	0.539257
Acc01091.1	1.43968	-0.177537	0.999954	0.946704	0.659171	0.640787	0.689068
Acc01092.1	61.8489	0.10589	0.999954	0.214026	0.409494	0.133903	0.536027
Acc01093.1	32.7688	0.0314313	0.999954	0.0891486	0.813652	-0.145209	0.549734
Acc01094.1	244.124	-0.0691033	0.999954	-0.494378	0.0143659	-0.782673	3.40178e-07
Acc01095.1	60.6877	0.153187	0.999954	-0.338985	0.237279	-0.876902	1.05855e-05
Acc01096.1	248.081	-0.0556602	0.999954	-0.0549056	0.713041	-0.0071751	0.957977
Acc01097.1	6.79189	0.55382	0.904695	0.328091	0.617184	0.375663	0.414467
Acc01098.1	100.281	-0.00305231	0.999954	0.0304667	0.899115	0.190792	0.107286
Acc01099.1	15.3998	0.230288	0.999954	1.42042	0.112797	-1.48095	0.24949
Acc01100.1	5.11979	0.398287	0.999954	3.02882	0.0295499	1.00146	0.499651
Acc01101.1	1450.7	0.315461	0.999954	-0.800909	0.0747495	-0.875712	0.00914648
Acc01102.1	1.18603	-0.300076	0.999954	-0.336849	0.894521	0.277058	0.874907
Acc01103.1	217.141	-0.0823381	0.999954	0.0269151	0.898062	-0.136515	0.223344
Acc01104.1	0	NA	NA	NA	NA	NA	NA
Acc01105.1	57.5294	0.0146858	0.999954	0.341242	0.551469	-0.311776	0.534048
Acc01106.1	87.9013	-0.0899838	0.999954	0.0468919	0.819562	0.145732	0.299632
Acc01107.1	3.33343	0.377898	0.999954	-0.675983	0.456047	-0.38714	0.67599
Acc01108.1	51.467	0.0323807	0.999954	0.365483	0.244248	0.546256	0.00937281
Acc01109.1	2135.97	-0.0116563	0.999954	0.18272	0.179399	0.191055	0.0566998
Acc01110.1	84.2841	-0.04211	0.999954	-0.0815393	0.743248	-0.133255	0.438049
Acc01111.1	299.506	0.0659676	0.999954	-0.271487	0.143457	-0.240077	0.0923299
Acc01112.1	46.5827	-0.227849	0.999954	0.531967	0.16608	0.026434	0.949944
Acc01113.1	18.4001	0.284314	0.999954	0.251326	0.646852	-0.479486	0.335297
Acc01114.1	16.1185	-0.39649	0.894541	0.639831	0.170922	0.501727	0.155747
Acc01115.1	720.306	0.401863	0.861807	0.206449	0.5894	0.95293	2.37028e-05
Acc01116.1	154.773	0.209872	0.874198	-0.144958	0.40408	-0.0335751	0.820713
Acc01117.1	23.1151	-0.10791	0.999954	1.02163	0.0186922	0.667152	0.0827119
Acc01118.1	17.6434	-0.0386172	0.999954	-0.0762929	0.873387	-0.210379	0.500568
Acc01119.1	225.963	-0.0475828	0.999954	0.221592	0.273523	0.096427	0.564336
Acc01120.1	1248.3	-0.0105886	0.999954	0.0549091	0.820444	0.696416	1.30664e-08
Acc01121.1	87.0238	0.0793945	0.999954	0.0464993	0.830757	-0.132919	0.333009
Acc01122.1	216.474	-0.0268088	0.999954	0.116082	0.517489	0.0477243	0.755509
Acc01123.1	62.5891	-0.00781992	0.999954	-0.280525	0.681415	-1.1776	0.00233931	AT1G76490.1	3-hydroxy-3-methylglutaryl-coenzyme A reductase 1 (HMG-CoA reductase 1) (putative)	HMGR	HMGR1.1
Acc01124.1	0	NA	NA	NA	NA	NA	NA
Acc01125.1	67.6722	0.0305533	0.999954	0.0666675	0.822392	-0.229086	0.161675
Acc01126.1	8.43306	0.040631	0.999954	0.228086	0.748728	0.388282	0.449123
Acc01127.1	8.86368	-1.21308	0.851821	0.0659892	0.935422	0.00135586	0.99778
Acc01128.1	6.27812	0.264278	0.999954	0.118964	0.872448	0.101446	0.858018
Acc01129.1	111.307	0.050068	0.999954	0.568163	0.111519	1.08807	1.05407e-05
Acc01130.1	107.731	-0.0941509	0.999954	-0.0628696	0.764691	-0.205871	0.0970672
Acc01131.1	8.12563	-0.0418287	0.999954	-0.181388	0.778878	0.481245	0.23739
Acc01132.1	659.114	0.25656	0.999954	-0.0747667	0.905458	-0.92909	0.00224217
Acc01133.1	3.74563	0.155701	0.999954	-0.293135	0.736193	0.407205	0.490449
Acc01134.1	556.78	-0.0121001	0.999954	0.136139	0.169414	0.0360303	0.671825
Acc01135.1	14.2535	0.492799	0.67869	-0.304312	0.51617	-0.0146862	0.967854
Acc01136.1	1.83617	-0.528857	0.999954	0.37336	0.837463	-3.53266	0.000354733
Acc01137.1	282.521	-0.0694001	0.999954	-0.0250315	0.941358	-0.453356	0.00419133
Acc01138.1	0.125439	0.0247132	0.999954	-0.67143	NA	-0.441231	NA
Acc01139.1	7.70481	-0.318211	0.999954	0.609053	0.28908	0.85657	0.0250731
Acc01140.1	67.23	0.0985962	0.999954	0.00206941	0.995931	0.21898	0.249978
Acc01141.1	3.80349	0.410292	0.999954	-0.696186	0.489575	0.719647	0.381913
Acc01142.1	111.315	0.0424325	0.999954	-0.0311257	0.927295	-0.270193	0.104567			EXPA	EXP8
Acc01143.1	1.19847	1.36566	0.999954	1.89785	0.265052	-0.328039	0.807657
Acc01144.1	231.767	0.163081	0.999954	0.638018	0.0970034	1.955	1.667e-12
Acc01145.1	2364.4	-0.0235741	0.999954	0.256858	0.0459725	-0.0320727	0.805784
Acc01146.1	1021.86	-0.124379	0.999954	-0.701341	0.000142211	-0.417284	0.00571418
Acc01147.1	138.093	-0.190926	0.904786	0.0668997	0.762852	-0.331965	0.00680621
Acc01148.1	53.0728	0.18459	0.999954	0.0285762	0.936876	-0.478621	0.00785084
Acc01149.1	124.148	0.0828107	0.999954	0.049208	0.793852	0.105095	0.391135
Acc01150.1	0.690831	-0.762956	0.999954	-0.16413	NA	-0.0805601	NA
Acc01151.1	54.2783	0.169228	0.999954	-0.759592	0.0150326	-0.393597	0.132966
Acc01152.1	4.66722	1.1349	0.70414	0.626384	0.506544	0.37318	0.548091
Acc01153.1	111.33	-0.0928927	0.999954	-0.209354	0.341402	-0.213514	0.197191
Acc01154.1	25.3774	0.275768	0.999954	0.146412	0.725427	-0.0998172	0.756953
Acc01155.1	135.504	-0.321704	0.67869	0.364288	0.0691912	0.139342	0.41694
Acc01156.1	6.34792	0.100233	0.999954	0.216679	0.796145	1.6745	0.0180669
Acc01157.1	0	NA	NA	NA	NA	NA	NA
Acc01158.1	5.55756	-0.0599548	0.999954	-0.889687	0.156178	-0.0987633	0.851104
Acc01159.1	128.467	-0.151365	0.999954	-0.00959176	0.975079	0.288563	0.0358454
Acc01160.1	688.831	-0.0410229	0.999954	-0.00816192	0.96816	0.0527239	0.652727
Acc01161.1	19.2081	0.055456	0.999954	0.871323	0.0152087	0.689094	0.0250246
Acc01162.1	34.5817	0.120827	0.999954	0.425557	0.433	0.755781	0.0461673
Acc01163.1	136.753	-0.229674	0.985069	0.376018	0.126207	0.445518	0.0101924
Acc01164.1	263.399	0.0349581	0.999954	0.498339	0.0181989	0.361315	0.0224941
Acc01165.1	0.456048	1.25793	0.999954	0.251181	NA	-0.08056	NA
Acc01166.1	8.02378	0.220976	0.999954	-0.199912	0.807487	0.24365	0.801813
Acc01168.1	294.702	-0.0993959	0.999954	0.20229	0.294175	0.134042	0.374962
Acc01169.1	6.0643	-0.0245751	0.999954	-0.336153	0.727101	1.64285	0.00195258
Acc01170.1	51.3668	0.0238901	0.999954	0.223466	0.410895	0.0407708	0.865702
Acc01171.1	36.1924	-0.153548	0.999954	-0.115951	0.70406	0.410171	0.0383119
Acc01172.1	104.733	-0.0291746	0.999954	0.910734	0.00508883	1.55419	6.32171e-10
Acc01173.1	119.46	-0.113162	0.999954	0.490628	0.373731	-0.111728	0.822179
Acc01174.1	0	NA	NA	NA	NA	NA	NA
Acc01175.1	1.67213	0.713126	0.999954	0.761688	0.625491	-0.0814226	0.954252
Acc01176.1	0.151112	-0.927622	0.999954	-0.11189	NA	-0.0805598	NA
Acc01177.1	0	NA	NA	NA	NA	NA	NA
Acc01178.1	3.69657	0.356464	0.999954	0.36779	0.631785	0.914906	0.282421
Acc01179.1	2.17648	-1.11999	0.965473	-1.20746	0.273938	-0.63051	0.499651
Acc01180.1	10.8977	-0.0404536	0.999954	-0.315532	0.576878	0.484428	0.141443
Acc01181.1	80.1761	0.0923857	0.999954	-0.0203087	0.947943	0.150525	0.346323
Acc01183.1	0.0282565	0.00156185	0.999954	0.226594	NA	0.280108	NA
Acc01184.1	219.101	0.0522455	0.999954	0.0257822	0.936113	0.688521	5.34651e-06
Acc01185.1	26.8868	0.0422642	0.999954	0.336913	0.332466	0.362278	0.157177
Acc01186.1	22.1582	-0.179726	0.999954	-0.0682217	0.870191	-0.637387	0.00486128
Acc01187.1	0.830325	0.559983	0.999954	-0.725561	0.754892	1.34068	0.378114
Acc01188.1	0.01388	-0.00452955	0.999954	-0.125548	NA	-0.0805587	NA
Acc01189.1	0.595525	-0.10472	0.999954	0.140832	NA	-0.44244	NA
Acc01190.1	17.4686	-0.0908851	0.999954	-0.377861	0.372935	0.661975	0.0237294
Acc01191.1	16.3143	0.635863	0.772811	-0.553129	0.20969	0.522063	0.108947
Acc01192.1	0.37804	0.251264	0.999954	-0.307669	NA	-1.06288	NA
Acc01193.1	0.928972	1.01735	0.999954	-0.0386982	0.986972	-0.0888607	0.962842
Acc01194.1	9.08876	0.249592	0.999954	-0.100825	0.878238	0.361601	0.329028
Acc01195.1	0.826975	0.389659	0.999954	0.165892	0.951866	1.00146	0.516707
Acc01196.1	908.671	0.256586	0.574383	0.0202324	0.927065	0.291949	0.00520953
Acc01197.1	71.6675	-0.0868176	0.999954	0.268437	0.177808	-0.14324	0.399141
Acc01198.1	9.14687	1.23901	0.354137	-0.0768762	0.955909	2.67367	0.00764767
Acc01199.1	108.473	0.0572935	0.999954	0.240799	0.163755	-0.118933	0.47124
Acc01200.1	164.019	-0.167586	0.999954	0.853769	0.0184916	0.86363	0.00162643
Acc01201.1	177.983	0.167982	0.999954	-0.248509	0.587448	0.0565846	0.888698
Acc01202.1	192.749	0.211986	0.99235	-0.172167	0.501921	0.118054	0.541726
Acc01203.1	77.5148	0.503949	0.585086	-0.342108	0.263602	0.0195188	0.954252
Acc01204.1	43.3642	0.1203	0.999954	-0.240237	0.309136	-0.0822304	0.719648
Acc01205.1	25.3219	-0.0991762	0.999954	-0.857849	0.123041	-0.308493	0.523787
Acc01206.1	111.646	-0.0569998	0.999954	0.387685	0.0377561	0.201031	0.165191
Acc01207.1	0.171512	0.480427	0.999954	-0.371682	NA	1.00146	NA
Acc01208.1	62.5585	0.0897468	0.999954	-0.780359	0.0173795	0.542744	0.0333813
Acc01209.1	9.39878	-0.0384308	0.999954	-0.625182	0.163003	0.74203	0.0311527
Acc01210.1	101.11	-0.17906	0.86178	-0.00726783	0.976737	0.0248789	0.874813
Acc01211.1	20.4466	-0.0197806	0.999954	-0.0783225	0.875926	0.0858642	0.793794
Acc01212.1	7.80449	-0.0728309	0.999954	-0.480531	0.593695	-0.574373	0.382302
Acc01213.1	0.0701348	0.420716	0.999954	0.216839	NA	0.280108	NA
Acc01214.1	4.00682	0.94592	0.934974	1.04882	0.219588	-0.0894126	0.962905
Acc01215.1	126.348	0.193761	0.999954	-0.66189	0.00102864	-0.0466523	0.83144
Acc01216.1	2.62407	0.368272	0.999954	1.4171	0.346765	-0.0860792	0.922317
Acc01217.1	5.01662	-0.213294	0.999954	-0.129005	0.873854	-0.0605465	0.923762
Acc01218.1	0	NA	NA	NA	NA	NA	NA
Acc01219.1	16.1353	0.293477	0.999954	-0.266378	0.634699	-0.405795	0.263579
Acc01220.1	42.906	0.00923499	0.999954	-0.0034781	0.993413	-0.396715	0.0225205
Acc01221.1	19.6784	0.115359	0.999954	1.74789	0.000670277	1.336	0.0178454
Acc01222.1	158.457	0.0498337	0.999954	-0.0560514	0.771137	0.0199947	0.892015
Acc01223.1	14.7606	0.328195	0.999954	0.651351	0.0962061	-0.0944063	0.841093
Acc01225.1	0.248573	-1.0864	0.999954	0.595592	NA	-0.08056	NA
Acc01226.1	1.72041	-0.470686	0.999954	0.380749	0.875926	-0.0805601	0.96568
Acc01227.1	5.52922	0.407242	0.999954	0.691934	0.542466	-0.0747277	0.956342
Acc01228.1	8.13303	0.0817198	0.999954	-0.342154	0.643414	-0.160067	0.838214
Acc01229.1	347.185	0.192318	0.886248	-0.327633	0.0327484	-0.183906	0.142324
Acc01230.1	435.228	0.0542614	0.999954	-0.115734	0.658032	-0.508817	0.000687809
Acc01231.1	46.4263	0.139224	0.999954	0.170038	0.594935	0.398858	0.0445328
Acc01232.1	14.4594	0.447831	0.999954	-1.03029	0.205232	-1.59441	0.00709367
Acc01233.1	127.39	0.38171	0.706073	-0.186902	0.533049	-0.166599	0.440708
Acc01234.1	403.126	-0.0709573	0.999954	-0.0465239	0.787475	0.192545	0.0526421
Acc01235.1	272.768	0.10271	0.999954	-0.121034	0.518667	0.264732	0.0285146
Acc01236.1	86.3026	0.0365181	0.999954	0.114762	0.560703	-0.132346	0.335993
Acc01237.1	85.0094	-0.0581935	0.999954	0.182294	0.440952	0.213954	0.17098
Acc01239.1	44.2023	0.0371739	0.999954	0.325688	0.218335	-0.0993222	0.69454
Acc01240.1	432.376	0.217752	0.953891	-0.655683	0.000366454	-0.735564	2.09746e-07
Acc01241.1	6.9645	0.0835047	0.999954	1.07252	0.0910543	0.982555	0.0103385
Acc01242.1	40.7167	-0.0918989	0.999954	0.035446	0.9202	0.295994	0.149678
Acc01243.1	175.232	0.0118007	0.999954	0.240778	0.45744	0.841849	0.000164048
Acc01244.1	70.2274	0.016564	0.999954	0.00515911	0.992271	-0.461083	0.0686591
Acc01245.1	183.468	0.309518	0.927835	-0.299706	0.294829	0.186203	0.415417
Acc01246.1	33.8264	-0.133291	0.999954	-0.0581217	0.86471	-0.202904	0.289438
Acc01247.1	97.5805	0.00736425	0.999954	0.0109888	0.967416	-0.170277	0.211
Acc01248.1	29.7188	0.248988	0.934504	-0.0303983	0.935766	-0.15908	0.584904
Acc01249.1	259.345	-0.149276	0.999954	0.0848303	0.841617	0.0553618	0.859571
Acc01250.1	18.0397	-0.208272	0.999954	0.309962	0.393376	0.16703	0.628995
Acc01252.1	59.2826	-0.164151	0.999954	0.0521605	0.869162	-0.346398	0.0353737
Acc01253.1	77.8762	0.0375268	0.999954	0.181902	0.489917	0.357858	0.0453388
Acc01254.1	2.50883	0.784474	0.974026	0.187503	0.883067	0.576719	0.383507
Acc01255.1	0	NA	NA	NA	NA	NA	NA
Acc01256.1	0.29158	-0.292553	0.999954	0.566222	NA	0.612795	NA
Acc01257.1	85.3433	0.339684	0.424752	-0.261426	0.119246	0.132612	0.346773
Acc01258.1	157.938	0.0717719	0.999954	-0.0104114	0.986854	1.30106	3.06361e-06
Acc01259.1	74.7104	0.0148463	0.999954	0.0145008	0.961686	0.0202585	0.928515
Acc01260.1	0	NA	NA	NA	NA	NA	NA
Acc01261.1	644.906	0.0922293	0.999954	-0.0945246	0.74648	0.728234	3.00733e-06
Acc10891.1	182.928	-0.111741	0.999954	-0.202768	0.211121	-0.0865613	0.531797
Acc10892.1	1775.21	0.366044	0.999954	-0.975143	0.015599	-0.243305	0.514208
Acc10893.1	40.9458	0.10561	0.999954	-0.256223	0.463603	-0.167508	0.545193
Acc10894.1	15.0689	0.348732	0.999954	0.321382	0.606106	-0.44355	0.284532
Acc10895.1	45.5628	-0.0167658	0.999954	-0.211171	0.398335	0.145435	0.449497
Acc10896.1	563.119	-0.017266	0.999954	0.0824175	0.61857	0.579116	1.19101e-09
Acc10897.1	0	NA	NA	NA	NA	NA	NA
Acc10898.1	83.7366	0.204801	0.999954	0.747442	0.00244039	0.290729	0.179825
Acc10899.1	0	NA	NA	NA	NA	NA	NA
Acc10900.1	141.299	0.0823607	0.999954	0.293065	0.501788	0.702747	0.0237282
Acc10901.1	71.9905	-0.0642228	0.999954	0.092455	0.699019	0.217034	0.210255
Acc10902.1	948.752	0.0901945	0.999954	1.00499	9.17306e-05	0.94738	2.87174e-06
Acc10903.1	282.887	0.401224	0.807597	-0.454501	0.118347	0.0585314	0.841047
Acc10904.1	79.8218	-0.166364	0.97966	-0.111033	0.598693	-0.451006	0.000152078
Acc10906.1	4.92445	-1.35776	0.713512	-3.43921	7.35689e-06	-2.62568	0.0121973
Acc10907.1	0.135023	-0.341011	0.999954	0.201257	NA	1.3515	NA
Acc10908.1	165.694	-0.0217958	0.999954	-0.152752	0.313226	0.00372096	0.977187
Acc10909.1	0.246698	-0.242957	0.999954	0.939289	NA	-0.08056	NA
Acc10911.1	156.161	0.125935	0.995868	0.165609	0.289904	0.0599616	0.636788
Acc10912.1	0.317868	0.292984	0.999954	-0.290006	NA	0.640786	NA
Acc10913.1	0.042822	-0.71368	0.999954	-0.142602	NA	-0.0805587	NA
Acc10914.1	67.2539	0.318888	0.999954	1.08947	0.0436383	1.52393	0.0359617
Acc10915.1	345.189	0.0694166	0.999954	-0.48877	0.0344637	-0.757612	1.40172e-05
Acc10916.1	709.915	0.13169	0.998598	0.0126553	0.953718	0.0851347	0.489039
Acc10917.1	609.122	0.14442	0.819597	0.00243415	0.989669	0.289842	0.000165003
Acc10918.1	91.5528	-0.00255067	0.999954	0.98594	0.00171241	1.07399	9.80557e-06
Acc10919.1	109.973	0.147422	0.999954	-0.217228	0.462659	-0.216036	0.322202
Acc10920.1	206.134	0.0608468	0.999954	0.106006	0.376091	0.205981	0.00845192
Acc10921.1	1529.99	-0.151219	0.600666	-0.141269	0.105861	-0.339737	1.53224e-08
Acc10922.1	0	NA	NA	NA	NA	NA	NA
Acc10923.1	16.1983	0.11455	0.999954	0.00335717	0.9957	-0.70156	0.00773556
Acc10924.1	43.1842	-0.0766562	0.999954	1.5198	0.000549983	0.689961	0.055903
Acc10925.1	25.5779	0.384011	0.957367	0.0173147	0.978476	-0.310204	0.339268
Acc10926.1	70.4587	0.310613	0.999954	0.0479052	0.949245	-1.51225	0.000883393
Acc10927.1	21.053	0.0848359	0.999954	0.242849	0.507181	0.602894	0.0112395
Acc10928.1	0.0815987	-0.242135	0.999954	0.207099	NA	-0.0805588	NA
Acc10929.1	21.7194	0.111176	0.999954	0.0668418	0.90512	-0.46713	0.0692277
Acc10930.1	0.480884	-1.0967	0.999954	0.0833926	NA	-0.0805601	NA
Acc10931.1	117.287	0.105453	0.999954	0.0117379	0.970627	-0.31604	0.0365132
Acc10932.1	174.351	-0.0985218	0.999954	0.380305	0.0380897	0.422284	0.00221765
Acc10933.1	52.1486	-0.116852	0.999954	-0.115865	0.69129	-0.466026	0.00352115
Acc10934.1	21.1711	-0.188376	0.999954	0.587024	0.0625981	-0.0920072	0.799688
Acc10935.1	815.922	0.158633	0.999954	0.226341	0.537473	-1.02043	4.6051e-06
Acc10936.1	130.101	0.218674	0.999954	0.312946	0.496861	-0.285508	0.424178
Acc10937.1	23.7353	0.314685	0.932296	-0.0856614	0.81271	-0.20761	0.383499
Acc10938.1	0.52862	-0.63466	0.999954	0.601723	NA	-0.0805601	NA
Acc10939.1	4.16593	1.04596	0.733964	2.92651	0.00153885	1.58252	0.170306
Acc10940.1	0.0511473	-0.346918	0.999954	-0.151143	NA	-0.0805587	NA
Acc10941.1	1.7139	-0.597237	0.999954	0.628136	0.700932	0.0709106	0.958004
Acc10942.1	126.213	0.160396	0.999954	-0.0843082	0.714526	-0.108139	0.493504
Acc10943.1	0.36652	0.151292	0.999954	1.72561	NA	-0.441233	NA
Acc10944.1	0.331936	-0.268199	0.999954	1.31147	NA	0.640787	NA
Acc10945.1	423.15	-0.0779662	0.999954	-0.120323	0.401443	0.12631	0.210032
Acc10946.1	2.93747	0.655605	0.970438	0.137327	0.924692	-0.432654	0.791453
Acc10947.1	267.919	0.114354	0.999954	0.332754	0.123298	0.471603	0.00264858
Acc10948.1	8.62648	0.0668824	0.999954	0.854864	0.171144	0.793338	0.0227197
Acc10949.1	659.219	-0.0678904	0.999954	-0.191017	0.0704467	-0.0724573	0.427281
Acc10950.1	32.7402	0.0407394	0.999954	0.21666	0.51611	-0.0508614	0.854362
Acc33660.1	0.380214	-0.641558	0.999954	-0.9006	NA	-0.403167	NA
Acc10951.1	54.9973	0.367285	0.992299	-0.535808	0.158735	0.412935	0.165038
Acc10953.1	147.465	0.113863	0.999954	-0.0380553	0.854275	-0.462401	2.80035e-06
Acc10954.1	200.704	-0.201943	0.794283	-0.175367	0.244333	-0.156435	0.156049
Acc10955.1	110.933	0.109912	0.999954	-0.295251	0.278087	-0.236187	0.244493
Acc10956.1	18.7217	-0.453125	0.999954	1.76448	0.000634291	2.29648	2.38201e-09
Acc10957.1	35.8784	-0.117168	0.999954	-0.386167	0.211367	0.645152	0.00673641
Acc10958.1	63.378	-0.118544	0.999954	0.219821	0.423079	-0.453965	0.00789952
Acc10959.1	12.643	-0.120371	0.999954	-0.404735	0.374737	0.418979	0.241983
Acc10960.1	127.423	-0.0654997	0.999954	-0.27204	0.206565	-0.637232	1.44758e-05
Acc10961.1	3.88369	0.838219	0.998598	0.0652135	0.977169	1.00146	0.525585
Acc10962.1	301.385	-0.165433	0.70414	-0.313098	0.0012803	-0.339972	8.10155e-06
Acc10963.1	396.107	-0.0744363	0.999954	-0.32725	0.141007	-0.665147	1.76982e-05
Acc10964.1	3969.43	-0.177836	0.999954	0.461965	0.0196692	0.725742	6.87204e-07
Acc10965.1	95.413	-0.10208	0.999954	-0.0878234	0.708104	-0.706832	1.27674e-07
Acc10966.1	98.3191	-0.0103157	0.999954	-0.0143091	0.947459	-0.127393	0.301113
Acc10967.1	143.027	-0.00167568	0.999954	-0.297458	0.155408	-0.971301	1.51007e-11
Acc10968.1	18.2925	-0.241352	0.999954	-0.599032	0.111217	0.145879	0.681766
Acc10969.1	8.85259	0.194253	0.999954	-3.30246	0.000154	-3.02672	2.63662e-06
Acc10970.1	466.872	-0.175357	0.999954	0.227787	0.281481	-0.406258	0.00514796
Acc10971.1	96.8568	0.140265	0.999954	-0.218916	0.267616	-0.313631	0.0472898
Acc10972.1	24.1211	-0.184953	0.999954	0.578937	0.176761	0.0900899	0.842981
Acc10973.1	1197.93	-0.200087	0.999954	-0.204592	0.414836	-0.33648	0.0450195
Acc10974.1	251.139	0.0878283	0.999954	0.287153	0.263192	-0.177103	0.383692
Acc10975.1	26.9471	-0.296849	0.999954	0.516911	0.228052	-0.112935	0.75487
Acc10976.1	269.12	0.0882081	0.999954	-0.290978	0.0876634	-0.137031	0.339159
Acc10977.1	0.113712	0.815297	0.999954	-0.119176	NA	-0.801896	NA
Acc10978.1	18.0765	-0.701012	0.574383	-0.373213	0.272258	-0.598052	0.00637882
Acc10979.1	408.823	-0.00829154	0.999954	-0.272035	0.211974	0.163581	0.346907
Acc10980.1	178.524	0.232663	0.835	-0.278843	0.105305	-0.233501	0.0892483
Acc10981.1	299.27	-0.0096949	0.999954	0.439896	0.0113836	0.393586	0.00303869
Acc10982.1	129.389	-0.286071	0.736078	0.384375	0.0452363	0.0471347	0.808135
Acc10983.1	461.524	0.0767125	0.999954	-0.11815	0.483165	-0.186632	0.101349
Acc10984.1	29.0963	0.588201	0.620853	-0.00813488	0.989788	-0.13809	0.710192
Acc10985.1	192.902	-0.099453	0.999954	0.282058	0.268182	0.188575	0.355727
Acc10986.1	601.406	0.0465214	0.999954	-0.325934	0.00146378	-0.0574499	0.567469
Acc10987.1	0.279388	0.161854	0.999954	1.91719	NA	0.640786	NA
Acc10988.1	82.0258	0.269106	0.746502	-0.0170173	0.953718	0.368039	0.0134071
Acc10989.1	224.368	-0.173561	0.934619	0.276109	0.0631656	-0.097648	0.450951
Acc10990.1	0.849401	-0.136803	0.999954	1.30087	0.520865	-0.100905	0.954252
Acc10991.1	106.566	-0.178484	0.934504	0.226948	0.17337	0.134559	0.317591
Acc10992.1	673.491	0.0358244	0.999954	-0.165732	0.52869	0.244603	0.166205
Acc10993.1	286.748	-0.103167	0.999954	0.192708	0.462915	-0.522227	0.00183439
Acc10994.1	79.7641	0.125419	0.999954	-0.230937	0.383984	-0.291857	0.126218
Acc10995.1	62.2981	0.0315764	0.999954	0.436352	0.0248746	-0.104386	0.589329
Acc10996.1	1.43867	1.19846	0.830993	-1.6317	0.262722	1.31627	0.328753
Acc10997.1	303.524	0.068211	0.999954	0.719155	0.0144608	1.21754	3.18864e-08
Acc10998.1	53.5586	0.018693	0.999954	0.000593339	0.998687	0.293585	0.0813595
Acc10999.1	83.0013	-0.255559	0.886248	0.471923	0.027742	0.566488	0.000356576
Acc11000.1	116.92	0.000338717	0.999954	0.0230207	0.939888	0.0890435	0.616021
Acc11001.1	13.6032	0.192608	0.999954	0.0963882	0.85929	-0.133996	0.66788
Acc11002.1	114.153	0.0536215	0.999954	0.0154994	0.947599	0.193796	0.102941
Acc11003.1	300.894	0.0188677	0.999954	-0.188206	0.132043	-0.375954	1.79683e-05
Acc11004.1	74.8933	0.0136097	0.999954	-0.137716	0.679148	-0.367739	0.0765871
Acc11005.1	0.166112	0.527424	0.999954	0.616054	NA	0.280112	NA
Acc11006.1	25.8912	0.119689	0.999954	0.23869	0.542882	0.234088	0.378849
Acc11007.1	0	NA	NA	NA	NA	NA	NA
Acc11008.1	166.283	0.0380146	0.999954	-0.0505686	0.793852	-0.149499	0.187714
Acc11009.1	48.6703	-0.0473637	0.999954	-0.24619	0.294835	-0.085234	0.698732
Acc11010.1	87.0171	-0.0101011	0.999954	-0.042074	0.857748	-0.41471	0.00110921
Acc11011.1	203.742	0.0448475	0.999954	0.372231	0.0199533	0.55787	2.53527e-06
Acc11012.1	147.647	-0.155049	0.999954	0.0714003	0.813011	-0.00362868	0.984665
Acc11013.1	102.228	-0.039722	0.999954	1.78908	2.82382e-05	2.6273	9.32227e-15
Acc11014.1	1.24283	-0.530921	0.999954	-1.29555	0.395984	-1.53913	0.105096
Acc11015.1	329.755	0.17843	0.999954	-0.230051	0.720629	-1.43523	4.41634e-05
Acc11016.1	14.4537	-0.24199	0.999954	-0.684016	0.0867482	-0.524199	0.134428
Acc11017.1	1.44351	0.159274	0.999954	0.773933	0.554041	0.275554	0.877786
Acc11018.1	3.28578	0.192223	0.999954	-1.36823	0.0714462	-1.01202	0.104637
Acc11019.1	28.1453	0.131527	0.999954	0.093264	0.850845	-0.00652115	0.984618
Acc11020.1	0.35508	-0.194209	0.999954	0.238593	NA	0.281941	NA
Acc11021.1	3.5767	-0.367196	0.999954	-1.11877	0.116597	-1.36939	0.0411193
Acc11022.1	45.0698	-0.0782419	0.999954	-0.0108723	0.983553	-0.428068	0.215017
Acc11023.1	1018.24	-0.122889	0.999954	0.309325	0.100452	0.933477	6.34754e-13
Acc11024.1	180.09	-0.0285807	0.999954	-0.175301	0.354783	-0.785995	1.08588e-10
Acc11025.1	51.5031	0.125794	0.999954	0.0659603	0.829057	0.365773	0.0360616
Acc11026.1	1431.27	0.166108	0.999954	-0.350811	0.38994	-0.633912	0.0197054
Acc11027.1	269.921	-0.179198	0.8155	0.0328828	0.85488	-0.360128	7.62526e-05
Acc11028.1	11.8173	-0.0899125	0.999954	-0.343009	0.55208	-1.11825	0.0102398
Acc11029.1	3.70871	0.427371	0.999954	-2.37369	0.00512945	-3.07048	0.00130209
Acc11030.1	8.89403	0.381632	0.999954	-1.63443	0.00312847	-2.25819	4.28237e-06
Acc11031.1	306.752	0.151421	0.999954	-0.426484	0.0427261	-0.300217	0.0700138
Acc11032.1	167.049	0.0952339	0.999954	-0.00228148	0.99261	0.0479008	0.733525
Acc11033.1	23.1681	-0.21546	0.999954	0.578132	0.128623	0.002088	0.994579
Acc11034.1	44.0105	0.304217	0.798812	-0.355917	0.0767492	-0.313254	0.0921816
Acc11036.1	559.311	-0.00893766	0.999954	-0.0814656	0.699204	-0.283524	0.0205957
Acc11037.1	20.8503	0.0643352	0.999954	0.175834	0.695176	0.812021	0.00807761
Acc11038.1	118.896	0.0073631	0.999954	-0.020893	0.926313	0.128617	0.285822
Acc11039.1	118.933	0.0445994	0.999954	-0.0130828	0.964746	0.665278	1.42702e-06
Acc11040.1	138.854	-0.103518	0.999954	0.0429631	0.823743	0.0293226	0.837013
Acc11041.1	68.5299	0.0651264	0.999954	0.292178	0.297562	0.457064	0.0103274
Acc11042.1	8.20829	-0.12061	0.999954	0.708466	0.291197	1.00083	0.0990277
Acc11117.1	51.5274	0.0449456	0.999954	0.16974	0.747986	0.682561	0.0238271
Acc11118.1	16.5649	0.041321	0.999954	0.0936285	0.854637	0.00206857	0.9949
Acc11119.1	2.19615	-0.0986644	0.999954	0.471983	0.735762	2.71191	0.00333986
Acc11120.1	3.82921	0.524661	0.990585	1.57245	0.193852	1.27626	0.282371
Acc11121.1	846.723	-0.0925649	0.999954	-0.168132	0.170943	-0.432065	2.46506e-07
Acc11122.1	284.102	0.192062	0.999954	-0.398956	0.171783	-1.40144	3.1756e-10
Acc11123.1	86.6063	-0.0257443	0.999954	-0.312319	0.0404354	-0.489707	3.68975e-05
Acc11124.1	924.475	-0.0354579	0.999954	0.0195519	0.850297	-0.0655241	0.273393
Acc11126.1	0.0127587	-0.365198	0.999954	-0.125544	NA	-0.0805587	NA
Acc11127.1	253.774	0.0894199	0.999954	0.02467	0.940369	0.546984	0.000325981
Acc11128.1	76.6386	0.00470767	0.999954	-0.177265	0.274175	-0.477374	6.14736e-05
Acc11129.1	317.919	0.109042	0.999954	0.337303	0.318487	0.247734	0.328418
Acc11130.1	641.727	-0.00856063	0.999954	0.0618495	0.728395	0.254154	0.0116963
Acc11131.1	64.841	0.037324	0.999954	-0.279252	0.24289	-0.466582	0.00688717
Acc11132.1	979.063	0.0277087	0.999954	-0.107716	0.379203	-0.117382	0.179126
Acc11133.1	40.8739	0.0264582	0.999954	0.0320686	0.931164	0.0919616	0.687444
Acc11134.1	0	NA	NA	NA	NA	NA	NA
Acc11135.1	145.399	0.0393733	0.999954	-0.50319	0.0663985	-0.809514	0.000104841
Acc11136.1	458.108	-0.0206131	0.999954	-0.324722	0.0343872	-0.193334	0.11377
Acc11137.1	84.6202	-0.174591	0.999954	0.40584	0.194563	0.800584	0.000111146
Acc11139.1	22.2231	-0.225156	0.999954	0.360186	0.357266	0.523949	0.0486643
Acc11140.1	0.357197	0.0243356	0.999954	-1.33158	NA	0.640786	NA
Acc11141.1	91.041	0.260017	0.999954	-0.205122	0.588473	-0.184648	0.58147
Acc11142.1	473.422	-0.138072	0.999954	-0.261273	0.0816534	-0.376483	0.000537314
Acc11143.1	50.8041	0.130297	0.999954	0.131939	0.599487	-0.0911138	0.64351
Acc11144.1	316.642	-0.127382	0.999954	-0.141181	0.530993	-0.619062	5.36354e-06
Acc11145.1	56.0695	0.237618	0.93623	0.139534	0.596519	0.177797	0.348578
Acc11146.1	1.9149	0.529346	0.999954	0.746489	0.716777	1.00146	0.493597
Acc11147.1	5.89822	0.288601	0.999954	0.245598	0.750395	0.416239	0.519383
Acc11148.1	8.3323	-0.0250196	0.999954	1.08452	0.135208	-0.645308	0.121087
Acc11149.1	56.7854	-0.211352	0.999954	-1.16142	0.00228526	-1.74545	3.9364e-08
Acc11150.1	20.7609	-0.248212	0.999954	0.229656	0.650049	0.243132	0.451463
Acc11151.1	472.897	0.653795	0.408666	-0.757288	0.00772384	0.106476	0.712101
Acc11152.1	4.41532	-0.170971	0.999954	0.90679	0.260159	0.755683	0.174779
Acc11153.1	70.289	0.0389313	0.999954	0.429513	0.0575588	-0.211166	0.27433
Acc11154.1	12.9344	-0.0388924	0.999954	0.589275	0.141187	0.464603	0.13736
Acc11155.1	73.2999	0.0950365	0.999954	0.415811	0.0113714	0.0441603	0.813201
Acc11156.1	34.008	-0.140264	0.999954	0.3709	0.205232	0.0982595	0.713131
Acc11157.1	32.1756	0.259216	0.998598	-0.107983	0.789502	-0.0886775	0.751063
Acc11158.1	54.3677	0.19598	0.999954	-0.372394	0.210529	0.709311	0.000851272
Acc11159.1	54.1853	0.127625	0.999954	0.134191	0.770432	0.996463	4.74163e-05
Acc11160.1	0	NA	NA	NA	NA	NA	NA
Acc11161.1	628.79	-0.267147	0.858053	0.120001	0.640437	-0.406662	0.0076404
Acc11162.1	18068.7	-0.00155281	0.999954	-0.0462814	0.916713	0.0720994	0.80242
Acc11163.1	1.3215	0.189033	0.999954	1.50085	0.385634	-2.43597	0.0220941
Acc11164.1	231.688	-0.0677621	0.999954	0.0480071	0.821591	-0.0829992	0.539161
Acc11165.1	1.06467	1.34168	0.999954	1.62296	0.51144	1.01244	0.577831
Acc11166.1	0.0177846	0.00765412	0.999954	-0.142602	NA	0.280108	NA
Acc11167.1	1123.29	-0.10997	0.999954	-0.0078123	0.989967	-0.168012	0.596541
Acc11168.1	20.5825	0.0241448	0.999954	0.51476	0.188871	0.211676	0.507211
Acc11169.1	360.594	-0.0230539	0.999954	-0.00212994	0.991604	-0.225207	0.00671332
Acc11170.1	23.7098	-0.0336269	0.999954	0.377931	0.451296	0.41082	0.238637
Acc11171.1	14.0462	0.128181	0.999954	1.87335	0.246338	0.280113	0.868827
Acc11172.1	69.6745	-0.123708	0.999954	-0.224364	0.308415	-0.577135	0.000209474
Acc11173.1	115.453	0.158528	0.999954	0.73103	0.0502705	0.422602	0.174066
Acc11174.1	48.7278	-0.262214	0.999954	0.930693	0.00513382	0.578119	0.0236232
Acc11175.1	23.3999	0.470035	0.758323	0.671299	0.0431202	0.458868	0.114831
Acc11176.1	45.0572	-0.202991	0.953456	0.239326	0.353277	-0.146995	0.450242
Acc11178.1	94.4531	-0.036677	0.999954	0.150224	0.432432	0.0413504	0.807351
Acc11179.1	813.578	0.552395	0.354033	0.0537845	0.876319	0.445362	0.01374
Acc11180.1	108.001	0.409336	0.768644	0.570993	0.033924	0.840787	4.81457e-05
Acc11181.1	543.017	0.138784	0.999954	0.987824	0.00292191	1.0538	5.63898e-05
Acc11182.1	36.0622	-0.0758645	0.999954	0.4079	0.0795852	0.152063	0.502379
Acc11183.1	9.66589	0.182547	0.999954	-0.414367	0.665412	1.00752	0.25811
Acc11184.1	62.1243	0.115919	0.999954	0.263732	0.223103	0.200277	0.277571
Acc11185.1	225.844	-0.0253926	0.999954	-0.235546	0.045339	-0.38939	6.0836e-06
Acc11186.1	4.70856	0.611734	0.878123	-0.404125	0.515405	0.233656	0.834537
Acc11187.1	84.0771	0.151638	0.999954	-0.354281	0.217034	-0.554938	0.00973773
Acc11188.1	39.7593	-0.0683195	0.999954	0.214734	0.519526	0.409792	0.0511139
Acc11189.1	2.62083	0.697965	0.910461	1.8589	0.215723	0.280113	0.870387
Acc11190.1	0.154007	0.0391627	0.999954	-0.114583	NA	0.280108	NA
Acc11191.1	2.29871	-1.51608	0.974026	-1.48161	0.450276	-0.0776632	0.967762
Acc11192.1	9.6613	-0.136	0.999954	-0.120584	0.893213	1.65289	0.00150932
Acc11193.1	3.18866	0.244513	0.999954	1.17152	0.282517	0.181714	0.851741
Acc11195.1	151.721	-0.150157	0.936401	-0.138412	0.364435	-0.402955	5.89399e-05
Acc11196.1	50.3579	-0.196396	0.999954	-0.43112	0.0476224	-0.257765	0.169324
Acc11197.1	80.9161	0.0287821	0.999954	0.19875	0.413316	-0.0800353	0.688999
Acc11198.1	14.7347	-0.0794444	0.999954	-0.0677292	0.905646	0.188038	0.599782
Acc11199.1	45.95	0.0886713	0.999954	-0.088013	0.798466	0.160787	0.460684
Acc11200.1	269.618	-0.0640867	0.999954	-0.0674104	0.785859	-0.103216	0.520136
Acc11201.1	0.35373	0.785465	0.999954	-0.539776	NA	-0.441233	NA
Acc11202.1	1.50562	-0.0634646	0.999954	0.000452155	0.99984	-0.0808366	0.949396
Acc11203.1	45.0685	-0.233806	0.999954	-0.579409	0.0106766	-0.189466	0.355664
Acc11204.1	25.1951	-0.395438	0.992256	-0.261067	0.551382	-0.216873	0.49745
Acc11205.1	169.972	-0.0244749	0.999954	-0.0427027	0.817499	-0.0927886	0.420219
Acc11206.1	0	NA	NA	NA	NA	NA	NA
Acc11207.1	54.6664	-0.105084	0.999954	0.0105933	0.976657	0.190586	0.289256
Acc11208.1	0.326985	0.233019	0.999954	-0.723363	NA	-1.16258	NA
Acc11209.1	994.415	-0.0851191	0.999954	0.574949	0.0173329	1.14155	8.97291e-11
Acc11210.1	2.35408	0.503061	0.999954	0.324643	0.780858	1.22965	0.271313
Acc11212.1	0.0177846	0.00765412	0.999954	-0.142602	NA	0.280108	NA
Acc11213.1	1.23867	-0.210544	0.999954	-0.460953	0.77353	-1.96094	0.093981
Acc11214.1	12.8742	0.270683	0.999954	0.539285	0.445609	-2.35039	0.000308879
Acc11215.1	88.0717	-0.0668089	0.999954	0.298924	0.065319	0.124516	0.386116
Acc11216.1	10.4801	-0.697451	0.999954	0.373374	0.791337	-3.18558	1.56928e-13
Acc11217.1	176.845	0.188582	0.999954	-0.313268	0.234329	-1.05783	1.71547e-10
Acc11218.1	0.448519	0.554067	0.999954	-0.762158	NA	-0.0805601	NA
Acc11219.1	12.3112	-0.156968	0.999954	1.71395	0.010406	3.53741	7.84319e-09
Acc11220.1	0.0279917	0.414622	0.999954	-0.135292	NA	-0.0805587	NA
Acc33775.1	0.0480938	-0.000720884	0.999954	-1.88548	NA	-0.0805587	NA
Acc11221.1	20.7719	-0.110527	0.999954	0.0364313	0.943056	0.243399	0.390935
Acc11222.1	242.666	-0.0122976	0.999954	0.725147	0.0177069	1.03609	5.43616e-06
Acc11223.1	42.7945	-0.150645	0.999954	0.13066	0.777646	-0.0462293	0.890979
Acc11224.1	36.6804	0.187088	0.999954	-0.17968	0.551373	0.00295531	0.989017
Acc11225.1	176.094	0.0613948	0.999954	0.0992875	0.640479	0.109132	0.475785
Acc11226.1	228.019	0.00359903	0.999954	0.0743553	0.66858	0.179303	0.0959498
Acc11227.1	15.2173	0.353212	0.999954	0.992845	0.0804616	-0.088223	0.928003
Acc11228.1	175.475	0.114846	0.999954	-0.0262519	0.894958	0.450104	3.58357e-06
Acc11229.1	38.7692	-0.132409	0.999954	0.145484	0.631709	0.175855	0.373318
Acc11230.1	992.991	0.140322	0.999954	0.346471	0.287712	0.485582	0.0336038
Acc11231.1	13.7576	0.107462	0.999954	0.0544765	0.935195	0.58006	0.153803
Acc11232.1	104.276	0.0631314	0.999954	-0.0725193	0.772171	-0.138902	0.395295
Acc11233.1	161.719	-0.0450295	0.999954	0.019079	0.941443	-0.143668	0.301136
Acc11234.1	91.2537	0.269311	0.980616	-0.378682	0.172992	-0.397584	0.0492265
Acc11235.1	38.0758	0.319843	0.934971	-0.180711	0.605545	0.128989	0.626618
Acc11236.1	37.0777	0.11006	0.999954	0.255842	0.672855	0.0469102	0.926663
Acc11237.1	99.9905	0.20542	0.992256	-0.231808	0.313623	-0.065695	0.755256
Acc11238.1	9.84032	0.421776	0.999954	0.358601	0.543435	-0.0464974	0.933626
Acc11239.1	10.6396	-0.382696	0.999954	1.25733	0.00668441	0.74793	0.0288564
Acc11240.1	35.5256	0.422422	0.86178	-0.222838	0.565498	0.105089	0.735656
Acc11241.1	122.448	-0.049826	0.999954	0.0603245	0.863529	0.106848	0.640352
Acc11242.1	1.54144	1.04438	0.968072	3.04806	0.0297468	2.58386	0.0157537
Acc11243.1	212.198	0.101193	0.999954	0.114816	0.502061	0.548193	1.62643e-07
Acc11245.1	0.374491	0.554281	0.999954	-0.102493	NA	-0.08056	NA
Acc11246.1	0.0534506	0.0417713	0.999954	0.24243	NA	-0.0805587	NA
Acc11247.1	42.8546	0.181602	0.999954	1.2741	0.000184857	0.222859	0.663957
Acc11248.1	51.3823	-0.210133	0.999954	0.0904059	0.780341	-0.457603	0.0117732
Acc11268.1	33.9609	0.264824	0.999954	-0.218677	0.559611	-0.542909	0.00475653
Acc11269.1	0.0803706	-0.242135	0.999954	-0.153568	NA	-0.0805587	NA
Acc11270.1	90.1229	-0.0548879	0.999954	0.289317	0.211974	0.415824	0.0112439
Acc11271.1	6.81725	-0.48195	0.998598	-0.880009	0.197169	-0.697725	0.070616
Acc11272.1	522.739	0.0794384	0.999954	-0.17736	0.25931	0.288753	0.00799141
Acc11273.1	1.98102	-0.672376	0.999954	1.2426	0.442814	0.200331	0.84027
Acc11274.1	0.39149	2.53149	0.932437	1.24824	NA	0.640787	NA
Acc11275.1	52.138	0.0466636	0.999954	-0.0330826	0.926832	-0.10762	0.630458
Acc11277.1	243.153	0.0967983	0.999954	-0.174699	0.224373	0.0885588	0.47752
Acc11278.1	29.5738	0.228658	0.999954	-0.0870399	0.86186	0.664889	0.0142779
Acc11279.1	8.43881	0.362859	0.999954	-0.0239756	0.981611	0.612598	0.149742
Acc11280.1	3.88759	0.200902	0.999954	0.574102	0.562236	-0.301249	0.734251
Acc11281.1	0	NA	NA	NA	NA	NA	NA
Acc11282.1	41.0576	0.124179	0.999954	-0.318273	0.449591	0.602928	0.0284907
Acc11283.1	3.58158	0.129995	0.999954	1.13625	0.131773	0.0523629	0.955808
Acc11284.1	41.9425	-0.124497	0.999954	0.132315	0.681706	-0.349547	0.0693803
Acc11285.1	0.0289709	-0.346921	0.999954	-0.151131	NA	-0.0805587	NA
Acc11286.1	88.7892	-0.0553491	0.999954	-0.0433624	0.876205	-0.528349	0.00025079
Acc11288.1	1.03375	-0.487746	0.999954	1.0205	0.644936	1.01066	0.525585
Acc11289.1	0.137247	0.0632112	0.999954	0.212414	NA	-0.44123	NA
Acc11290.1	89.0791	-0.0724058	0.999954	-0.425571	0.0423946	-0.102278	0.594753
Acc11291.1	5.54068	0.452568	0.999954	-0.812259	0.219283	0.842342	0.168105
Acc11292.1	5.17284	-0.106254	0.999954	0.205281	0.792415	0.867764	0.136981
Acc11293.1	616.284	-0.0318826	0.999954	0.437193	0.0709126	0.631077	0.000327146
Acc11294.1	2.30907	0.000435835	0.999954	0.602827	0.751206	0.599213	0.69105
Acc11295.1	0.086333	0.827685	0.999954	0.224154	NA	0.280109	NA
Acc11296.1	653.355	-0.155703	0.709043	0.00718607	0.963799	-0.258204	0.000223398
Acc11297.1	67.3955	-0.0765121	0.999954	0.568234	0.00202945	0.00963763	0.96568
Acc11298.1	175.888	-0.155949	0.985069	0.337799	0.0316998	0.399545	0.000626599
Acc11299.1	103.913	-0.00579905	0.999954	-0.0440281	0.908959	-0.338818	0.0833456
Acc11301.1	338.809	-0.100547	0.938626	-0.284019	0.000417531	-0.428583	1.29123e-11
Acc11302.1	1.13065	0.9784	0.995946	0.454843	0.836387	-0.0805601	0.96568
Acc11303.1	289.357	-0.159047	0.999954	0.628326	0.0602304	1.02959	2.67346e-05
Acc11304.1	204.606	-0.195951	0.667662	0.18684	0.125467	-0.103174	0.304878
Acc11305.1	209.534	-0.277029	0.667662	0.188924	0.30891	-0.190447	0.152655
Acc11306.1	25.3014	0.197217	0.999954	-0.0646864	0.875245	-0.766365	0.00481371
Acc11307.1	5.87465	-0.183514	0.999954	-0.567286	0.340611	0.371376	0.516196
Acc11308.1	1.7048	-0.131091	0.999954	-0.302076	0.843213	-0.105863	0.936916
Acc11309.1	0	NA	NA	NA	NA	NA	NA
Acc11310.1	93.3607	0.00488887	0.999954	0.112722	0.638911	0.279871	0.0670567
Acc11312.1	2.12359	-0.00218315	0.999954	0.66978	0.59189	0.508129	0.723138
Acc11313.1	19.1271	-0.180302	0.999954	-0.27429	0.456698	0.41923	0.104245
Acc11314.1	29.7716	0.166224	0.999954	0.401609	0.155637	-0.119222	0.613545
Acc11315.1	259.321	0.14473	0.999954	-0.191935	0.669134	0.381665	0.184324
Acc11316.1	0.257129	0.00763135	0.999954	-0.364763	NA	1.59816	NA
Acc11317.1	0.241394	1.88683	0.999954	-1.12204	NA	0.640786	NA
Acc11318.1	0	NA	NA	NA	NA	NA	NA
Acc11319.1	37.5883	-0.00327167	0.999954	0.0702989	0.841086	-0.11274	0.634976
Acc11320.1	117.843	0.008478	0.999954	-0.535453	0.0417138	0.124869	0.61739
Acc11321.1	95.7991	0.1239	0.999954	-0.2446	0.256826	-0.215298	0.189974
Acc11322.1	45.3283	0.155921	0.999954	-0.267494	0.504958	0.0741651	0.827052
Acc11323.1	0	NA	NA	NA	NA	NA	NA
Acc11324.1	29.7621	0.277377	0.948476	0.571912	0.0424907	0.735538	0.00239196
Acc11325.1	4.53559	0.614772	0.989798	-0.405231	0.686716	-0.795089	0.111823
Acc11326.1	127.186	0.234656	0.999954	0.823289	0.0356018	0.766079	0.0488981
Acc11327.1	0	NA	NA	NA	NA	NA	NA
Acc11328.1	20.2438	0.203243	0.999954	0.220658	0.564951	-0.970939	0.000139413
Acc11330.1	87.953	0.177138	0.999954	-0.0728882	0.865763	-0.151193	0.56433
Acc11331.1	5.31784	0.26308	0.999954	0.119912	0.902394	-0.0371059	0.964805
Acc11332.1	214.856	0.308662	0.887709	-0.192496	0.519481	0.389333	0.0439841
Acc11333.1	2.66609	-1.07828	0.888382	0.728773	0.46693	0.910705	0.180311
Acc11334.1	293.496	-0.13184	0.999954	0.0801258	0.752095	0.302492	0.0376211
Acc11335.1	70.786	-0.225795	0.999954	-0.511527	0.253352	0.000849703	0.997779
Acc11336.1	49.7332	0.481866	0.952718	-0.692298	0.126216	0.302818	0.434818
Acc11337.1	22.8652	0.183789	0.999954	-0.201809	0.58383	0.369519	0.133797
Acc11338.1	1136.16	0.000942931	0.999954	-0.253403	0.0799433	0.148819	0.209507
Acc11339.1	0.210514	0.0776754	0.999954	0.192171	NA	0.602283	NA
Acc11340.1	144.153	0.0677372	0.999954	0.204178	0.317332	0.0647143	0.708301
Acc11341.1	165.747	-0.0272757	0.999954	0.274052	0.211314	0.550729	0.000165481
Acc11346.1	5.98735	0.606592	0.910744	-0.45183	0.520517	-0.532589	0.339223
Acc11347.1	1.17886	0.0032422	0.999954	-1.80654	0.253145	-1.09323	0.472019
Acc11348.1	10.1215	0.102072	0.999954	0.406861	0.45516	-0.0978708	0.826297
Acc11349.1	5.8509	0.153746	0.999954	-0.219157	0.765555	0.0868614	0.88379
Acc11350.1	161.876	-0.0180658	0.999954	0.0100759	0.979143	-0.435	0.0127129
Acc11351.1	133.118	-0.146097	0.999954	0.111546	0.620346	-0.0446842	0.804529
Acc11354.1	0.0136859	0.40853	0.999954	-0.126762	NA	-0.0805587	NA
Acc11355.1	4.97243	0.280357	0.999954	-0.0306967	0.97413	0.845572	0.107794
Acc11356.1	96.466	0.101452	0.999954	-0.0990897	0.635571	-0.273474	0.0342785
Acc11357.1	0	NA	NA	NA	NA	NA	NA
Acc11358.1	200.851	-0.130726	0.999954	0.242989	0.14068	0.478094	3.94655e-05
Acc11359.1	4.2012	0.23532	0.999954	0.902253	0.400145	2.47652	0.00109349
Acc11360.1	196.639	-0.0624785	0.999954	-0.0225596	0.934301	0.340507	0.00925681
Acc06639.1	205.231	-0.129743	0.970438	0.0945907	0.501921	0.217171	0.0165019
Acc06638.1	1056.49	-0.0662866	0.999954	-0.39674	0.00157629	-0.234191	0.0227347
Acc06637.1	362.489	0.0304774	0.999954	-0.234368	0.148243	0.0204704	0.901389
Acc06636.1	227.326	0.0564841	0.999954	0.0535052	0.822392	0.565705	5.87427e-06
Acc11361.1	80.9831	0.0589941	0.999954	-0.0674075	0.832263	-0.866805	9.02913e-07
Acc11362.1	6.36407	0.217196	0.999954	1.36431	0.0345336	0.637066	0.161493
Acc11363.1	0	NA	NA	NA	NA	NA	NA
Acc11364.1	29.5795	0.0324619	0.999954	0.000197391	0.99984	0.427115	0.0710727
Acc11365.1	597.973	0.000899477	0.999954	-0.0622417	0.641285	-0.0147355	0.894329
Acc11366.1	252.339	-0.20965	0.887709	0.0194747	0.941726	-0.159285	0.258661
Acc11367.1	9.33395	0.232318	0.999954	-0.555352	0.285628	-0.321739	0.417652
Acc11368.1	85.0123	0.0878077	0.999954	-0.074216	0.794317	-0.341414	0.0379314
Acc11369.1	89.9322	0.0724739	0.999954	0.589119	0.00708011	0.953457	1.74988e-08
Acc11370.1	1.67259	-2.28387	0.511892	0.237783	0.884231	0.0159686	0.98598
Acc11371.1	28.5804	0.631153	0.511892	0.116251	0.83491	-0.0170563	0.967602
Acc11372.1	324.205	-0.14643	0.97524	-0.286423	0.041759	-0.253693	0.0209189
Acc11373.1	177.895	0.0220026	0.999954	0.0199507	0.933969	-0.0451738	0.760309
Acc11374.1	0.0671069	-1.08653	0.999954	-0.125552	NA	-0.0805587	NA
Acc11375.1	120.268	-0.0376899	0.999954	-0.344105	0.102182	-0.235763	0.167535
Acc11376.1	219.967	0.257439	0.999954	-0.128308	0.788445	-0.993857	8.1793e-05
Acc11378.1	2.42167	-0.0554675	0.999954	-0.290153	0.823012	0.849124	0.447062
Acc11379.1	132.567	-0.0289392	0.999954	0.065804	0.766751	0.15169	0.255498
Acc11380.1	1023.36	0.112627	0.999954	0.621959	0.0450973	1.39438	3.51672e-10
Acc11381.1	0.600581	0.0304355	0.999954	0.225033	NA	-0.0805601	NA
Acc11382.1	0	NA	NA	NA	NA	NA	NA
Acc11383.1	302.153	-0.00819687	0.999954	-0.114485	0.668373	0.42005	0.0102009
Acc11384.1	561.422	0.00367562	0.999954	-0.281455	0.0433999	-0.545931	6.39243e-08
Acc11385.1	30.8511	0.425895	0.999954	2.56148	0.00588575	-0.374166	0.678289
Acc11386.1	5.07852	0.965362	0.999954	2.35852	0.0590321	0.329888	0.790525
Acc11387.1	0.869845	0.646572	0.999954	0.169971	0.963563	-0.441233	0.853852
Acc11388.1	0	NA	NA	NA	NA	NA	NA
Acc11389.1	1.35179	0.667325	0.999954	0.790443	0.674681	1.95827	0.0708255
Acc11390.1	1082.56	-0.121459	0.967671	-0.257377	0.0187764	-0.299372	0.00027593
Acc11391.1	12.6982	-0.124049	0.999954	0.333082	0.530624	0.00695745	0.986869
Acc11392.1	250.948	0.04943	0.999954	-0.146191	0.527337	0.078006	0.67181
Acc11393.1	196.518	0.0973355	0.999954	-0.249292	0.306696	0.0710646	0.755185
Acc11394.1	212.335	0.0108432	0.999954	0.317159	0.19284	0.232477	0.208763
Acc11395.1	58.7528	-0.012007	0.999954	0.297021	0.293395	0.0108151	0.966395
Acc11396.1	7.29896	-0.205427	0.999954	-0.165276	0.788443	0.503138	0.232434
Acc11397.1	494.125	0.027112	0.999954	-0.318628	0.00275093	-0.448339	3.96422e-08
Acc11398.1	0.0161069	-0.00453042	0.999954	-0.125544	NA	-0.0805587	NA
Acc11400.1	0	NA	NA	NA	NA	NA	NA
Acc11401.1	58.0213	-0.0053566	0.999954	0.317607	0.136384	-0.312328	0.0372807
Acc11402.1	0	NA	NA	NA	NA	NA	NA
Acc11403.1	85.8989	0.0342843	0.999954	-0.149274	0.66463	-0.327586	0.122387
Acc11404.1	0.108198	0.479205	0.999954	0.207093	NA	0.28011	NA
Acc11405.1	290.816	0.0817067	0.999954	-0.469806	0.00307865	-0.201571	0.128431
Acc11406.1	284.12	0.0278669	0.999954	0.0861139	0.565053	0.171473	0.0758046
Acc11407.1	34.9579	-0.0364309	0.999954	0.504308	0.117369	0.48758	0.075348
Acc11409.1	21.8376	-0.260059	0.999954	0.2677	0.444903	0.213699	0.46781
Acc11410.1	67.4872	0.12641	0.999954	0.181108	0.473414	0.418094	0.013923
Acc11411.1	10.7732	0.386642	0.974026	1.03488	0.0759639	-0.13919	0.84053
Acc11412.1	121.215	-0.00239799	0.999954	0.138514	0.649182	-0.172307	0.39414
Acc11413.1	4.5401	0.0156743	0.999954	-0.340568	0.67451	-0.949078	0.0412406
Acc11414.1	2198	-0.247391	0.999954	-2.77899	8.46099e-24	-1.06439	1.41756e-05
Acc11415.1	1.72193	0.0377005	0.999954	0.166843	0.918571	2.34504	0.00682852
Acc11416.1	34.0877	0.124188	0.999954	0.194207	0.538865	0.316879	0.145088
Acc11417.1	172.641	0.212355	0.999954	0.70333	0.0925133	1.54476	1.46106e-07
Acc11418.1	0	NA	NA	NA	NA	NA	NA
Acc11419.1	288.614	0.0100847	0.999954	0.104964	0.511351	0.347988	0.000492696
Acc11420.1	357.12	0.188132	0.85054	-0.252373	0.0791609	-0.159499	0.160218
Acc11421.1	46.4409	-0.129987	0.999954	-0.271505	0.237124	-0.483449	0.00410582
Acc11422.1	268.003	0.0707581	0.999954	0.232521	0.156178	0.251299	0.0369005
Acc11423.1	421.214	-0.179916	0.969388	0.17537	0.356456	-0.177375	0.195384
Acc11424.1	0.0130618	-0.353013	0.999954	-0.142602	NA	-0.0805587	NA
Acc11425.1	26.3996	-0.290978	0.97524	-0.153937	0.67427	-0.24574	0.317017
Acc11426.1	304.154	0.0962899	0.999954	0.433797	0.00159033	0.258639	0.0171864
Acc11427.1	151.56	-0.170582	0.99472	0.250855	0.186117	0.0687098	0.683556
Acc11428.1	556.985	-0.0324228	0.999954	0.167215	0.299642	0.21815	0.0557858
Acc11429.1	976.403	0.206021	0.999954	-1.89394	0.00133418	-0.621682	0.232724
Acc11430.1	383.95	-0.017109	0.999954	-0.420206	0.000698666	-0.600622	8.19909e-11
Acc11431.1	32.1457	0.270128	0.97524	0.592435	0.0356018	0.635093	0.00818709
Acc11432.1	58.2152	-0.0259087	0.999954	0.0522276	0.850668	0.174761	0.259691
Acc11433.1	6.29132	0.397574	0.999954	-0.00544056	0.9957	0.725833	0.0918636
Acc33774.1	0.104667	0.0222755	0.999954	-0.956533	NA	-0.441227	NA
Acc11434.1	84.7444	-0.0947481	0.999954	0.193294	0.427851	0.000702684	0.997023
Acc11435.1	19.0024	0.0745589	0.999954	0.0282772	0.959337	0.299065	0.28866
Acc11436.1	72.7988	0.029304	0.999954	0.412685	0.0439315	0.141825	0.4074
Acc11437.1	3.10661	0.592879	0.999954	-0.808884	0.292203	0.32413	0.662394
Acc11438.1	178.467	0.316609	0.511892	0.301188	0.0760579	0.159216	0.250453
Acc11439.1	70.8942	-0.0992957	0.999954	0.255399	0.537313	-0.549694	0.0335415
Acc11440.1	126.035	0.0638088	0.999954	-0.335032	0.121365	-0.05377	0.801486
Acc11441.1	50.5119	0.0962511	0.999954	0.318253	0.203418	-0.0428828	0.866587
Acc11442.1	232.496	-0.134765	0.999954	0.119677	0.479159	-0.0626382	0.640923
Acc11443.1	0	NA	NA	NA	NA	NA	NA
Acc11444.1	6.53049	-0.37364	0.999954	0.829512	0.196403	0.343061	0.596831
Acc11445.1	128.602	-0.154743	0.999954	0.807265	1.2145e-06	1.00215	3.32271e-14
Acc11446.1	20.0544	0.277486	0.999954	0.444317	0.312509	0.473169	0.05467
Acc11447.1	571.101	-0.0805537	0.999954	-0.379343	0.000786209	-0.390126	5.70586e-06
Acc11448.1	0.0944569	0.436556	0.999954	-0.0938681	NA	0.640777	NA
Acc11449.1	115.815	-0.00596476	0.999954	0.291609	0.0440813	0.122853	0.334064
Acc11450.1	26.1761	0.182753	0.999954	0.183018	0.61024	0.516005	0.0196796
Acc11451.1	338.349	0.0917624	0.999954	0.400198	0.122005	0.805607	6.23916e-06
Acc11452.1	172.118	-0.0781447	0.999954	0.178247	0.234846	0.296527	0.00376021
Acc11453.1	183.068	-0.0968887	0.999954	-0.31781	0.142912	-0.274215	0.0983369
Acc11454.1	0.805466	-0.361159	0.999954	-1.95161	0.283054	-0.0805601	0.965774
Acc11455.1	15.6816	0.740779	0.806014	0.839088	0.0603771	1.01697	0.0488151
Acc11456.1	0.198693	-0.642054	0.999954	0.189906	NA	-0.08056	NA
Acc11457.1	172.505	-0.180449	0.85054	0.0531542	0.772204	0.0486241	0.702516
Acc11458.1	69.6586	-0.107631	0.999954	0.117164	0.659966	-0.231531	0.154434
Acc11459.1	319.996	0.00643492	0.999954	-0.316245	0.0426096	-0.175349	0.179965
Acc11460.1	114.137	0.474342	0.3388	-0.165497	0.485389	-0.198769	0.235519
Acc11461.1	399.803	0.0230379	0.999954	0.0333926	0.879683	-0.243119	0.0349021
Acc11462.1	360.869	-0.220281	0.999954	0.119403	0.711612	-0.484768	0.00813024
Acc11463.1	8.57789	0.271371	0.999954	0.895221	0.425557	0.0950054	0.917964
Acc11464.1	726.022	0.0731989	0.999954	0.31692	0.0816049	0.564462	1.44981e-05
Acc11465.1	1056.2	-0.210371	0.990726	-0.202274	0.407292	-0.0799519	0.693148
Acc11466.1	161.751	0.0239203	0.999954	-0.177407	0.370522	-0.256627	0.0702868
Acc11467.1	9.45363	0.341121	0.999954	-0.185456	0.772761	1.15501	0.00121222
Acc11468.1	58.0397	0.190141	0.999954	0.324202	0.260853	0.408101	0.0358557
Acc11469.1	0	NA	NA	NA	NA	NA	NA
Acc11470.1	3.31076	0.238874	0.999954	1.01083	0.285745	0.218688	0.789909
Acc11471.1	0.76856	-1.23636	0.999954	-3.00928	0.0696298	-2.28726	0.118421
Acc11472.1	125.826	-0.0433384	0.999954	0.114367	0.589074	0.313274	0.0312988
Acc11473.1	73.6113	-0.0751532	0.999954	0.137481	0.529387	0.117065	0.529378
Acc11474.1	0	NA	NA	NA	NA	NA	NA
Acc11475.1	2.48058	0.0221436	0.999954	2.3114	0.098301	1.95545	0.0682439
Acc11476.1	84.8778	0.0788605	0.999954	0.0863493	0.646211	0.101128	0.468749
Acc11477.1	0.814597	-1.4817	0.968072	0.712539	0.776108	1.36253	0.407019
Acc11478.1	0.0259004	-0.359104	0.999954	-0.134077	NA	-0.0805587	NA
Acc11479.1	0.488571	-1.6949	0.999954	1.66143	NA	0.987055	NA
Acc11480.1	0.414321	-0.198105	0.999954	-1.39852	NA	0.631038	NA
Acc11481.1	357.019	0.0642601	0.999954	-0.253497	0.33633	0.085915	0.70347
Acc11482.1	64.6396	0.596268	0.706073	-1.34967	1.19411e-05	-0.380732	0.128315
Acc11483.1	2.80154	0.487008	0.999954	3.22485	0.0163351	0.275806	0.872525
Acc11484.1	0.183546	1.83428	0.999954	-0.409225	NA	0.280113	NA
Acc11485.1	164.767	0.251166	0.932437	-0.355805	0.098161	0.190547	0.286526
Acc11486.1	89.6179	-0.138661	0.999954	-0.209386	0.246336	0.0499345	0.766676
Acc11487.1	192.292	-0.0572601	0.999954	0.206664	0.327134	0.167122	0.277382
Acc11488.1	47.392	0.147248	0.999954	-0.0241196	0.944588	0.274279	0.179174
Acc11489.1	263.789	-0.0653208	0.999954	-0.275568	0.129816	-0.065006	0.711653
Acc11491.1	88.7019	0.0120737	0.999954	-0.100941	0.653588	0.202197	0.158704
Acc11492.1	40.0239	-0.218089	0.999954	0.327433	0.215809	0.209669	0.374164
Acc11493.1	3.34652	-0.215068	0.999954	-0.699349	0.356836	-0.961173	0.226553
Acc11494.1	3.53318	-0.128687	0.999954	-0.245762	0.795377	0.383671	0.641779
Acc11495.1	0.829585	2.25881	0.999954	3.7989	0.185032	3.79018	0.0689082
Acc11496.1	16.7634	-0.192346	0.999954	-0.358322	0.384312	0.248873	0.687343
Acc11497.1	0.474288	0.191891	0.999954	-0.117787	NA	-0.0805601	NA
Acc11498.1	3.7289	0.641922	0.999954	-0.97643	0.282198	0.261635	0.664032
Acc11499.1	75.5048	-0.22973	0.968072	-0.213356	0.358955	-0.316619	0.0570416
Acc11501.1	0.753311	-0.657264	0.999954	1.51492	0.424839	-0.441234	0.808013
Acc11502.1	0.0402825	0.409749	0.999954	-0.705533	NA	-0.0805587	NA
Acc11503.1	196.099	-0.0234763	0.999954	0.355544	0.0458515	0.469352	0.000388482
Acc11504.1	7.6184	-0.0821706	0.999954	-0.506705	0.302495	-0.082839	0.878988
Acc11541.1	0.136495	-0.376168	0.999954	0.394749	NA	-0.801901	NA
Acc11542.1	0.0891435	0.0027817	0.999954	-0.352181	NA	-0.441227	NA
Acc11543.1	0	NA	NA	NA	NA	NA	NA
Acc11544.1	0.490959	0.862398	0.999954	0.786537	NA	-0.0805601	NA
Acc11545.1	111.708	0.069397	0.999954	0.259676	0.205319	0.0822455	0.637832
Acc11546.1	0.0407108	1.24684	0.999954	-0.146258	NA	-0.0805587	NA
Acc11547.1	147.233	-0.150065	0.999954	0.313594	0.146332	0.407599	0.008995
Acc11550.1	0	NA	NA	NA	NA	NA	NA
Acc11551.1	0.603845	1.1225	0.999954	0.247558	NA	-0.0805601	NA
Acc11552.1	102.165	0.0757003	0.999954	0.0976759	0.683521	0.336238	0.01703
Acc11553.1	235.569	0.312748	0.989651	-0.583398	0.064531	-0.106061	0.728857
Acc11554.1	6.91904	0.174015	0.999954	-0.742619	0.147791	-0.367731	0.469489
Acc11555.1	22.2261	-0.115243	0.999954	1.61871	0.000822932	3.01236	1.16482e-08
Acc11556.1	11.4945	0.0251958	0.999954	0.565545	0.244453	0.0410305	0.932195
Acc11557.1	139.602	0.127634	0.999954	0.0927154	0.712025	-0.0654627	0.735226
Acc11559.1	79.1044	0.0509991	0.999954	-0.140313	0.571017	-0.17933	0.325918
Acc11560.1	327.559	-0.264906	0.953891	0.207322	0.434359	0.370258	0.0331858
Acc11561.1	57.511	-0.165571	0.999954	0.170329	0.618148	-0.452388	0.054359
Acc11562.1	297.196	0.00525489	0.999954	-0.0433565	0.829218	-0.223762	0.050841
Acc11563.1	317.049	-0.0733682	0.999954	0.680865	0.0274016	1.50626	1.59927e-11
Acc11564.1	130.8	0.0302883	0.999954	0.0509757	0.852265	0.223171	0.155312
Acc11565.1	18.9666	0.511337	0.999954	-2.18756	0.0262708	-5.25434	6.19152e-22
Acc11566.1	863.363	-0.0284774	0.999954	0.620601	0.122311	0.632715	0.0345886
Acc11567.1	2.43266	0.549917	0.999954	-1.20569	0.240556	1.21619	0.335621
Acc11568.1	354.014	0.0164026	0.999954	-0.19143	0.117346	0.298938	0.000881634
Acc11569.1	216.349	0.0790087	0.999954	-0.0822579	0.499259	-0.256422	0.000931731
Acc11570.1	202.168	-0.0638602	0.999954	-0.164519	0.454112	-0.165323	0.285442
Acc11571.1	10.7532	0.260859	0.999954	0.524047	0.407991	1.42022	0.0798188
Acc11572.1	1.66689	0.649842	0.999954	-0.577126	0.745438	-1.05572	0.357796
Acc11573.1	0.0739155	-0.36276	0.999954	-1.28308	NA	-0.0805587	NA
Acc11574.1	51.8043	0.643689	0.354033	0.268281	0.429573	0.751389	0.000456274
Acc11575.1	0.834077	-0.911441	0.999954	1.23958	0.585831	-0.399171	0.842704
Acc11576.1	0.707848	0.615783	0.999954	0.225833	0.953719	-0.0805601	0.971873
Acc11577.1	0	NA	NA	NA	NA	NA	NA
Acc11578.1	0.390902	0.151035	0.999954	1.34709	NA	-0.441234	NA
Acc11579.1	1145.68	-0.0387407	0.999954	0.588057	0.0177705	1.24539	4.95714e-12
Acc11580.1	29.7019	-0.119741	0.999954	-0.0676532	0.854223	-0.271579	0.161164
Acc11581.1	28.3109	-0.0234031	0.999954	-0.100301	0.766694	-0.104897	0.6539
Acc11582.1	5.7852	-0.0670647	0.999954	0.0717243	0.939754	0.486392	0.334642
Acc11583.1	43.1882	-0.0424345	0.999954	-0.527106	0.020368	-0.563575	0.0013568
Acc11584.1	414.117	0.150387	0.999954	0.197251	0.443567	1.28287	2.57321e-16
Acc11585.1	5.54065	0.364779	0.999954	0.92165	0.120976	0.479314	0.466272
Acc11586.1	171.989	0.0612143	0.999954	-0.119944	0.49309	0.108273	0.419385
Acc11587.1	2.13006	-0.105062	0.999954	0.33368	0.899345	-0.441234	0.801178
Acc11588.1	1.27077	0.120822	0.999954	-0.831282	0.673054	-0.529625	0.69036
Acc11589.1	75.5797	0.230494	0.93212	-0.000493314	0.999146	0.0690201	0.735611
Acc11590.1	1.7984	-1.14929	0.984072	0.0291119	0.990589	-0.668438	0.499331
Acc11591.1	556.384	-0.153996	0.999954	0.00765408	0.988293	-0.541692	0.0155585
Acc11592.1	0.0431265	-0.365197	0.999954	0.235119	NA	-0.0805587	NA
Acc11593.1	0.906568	-0.300173	0.999954	-2.7137	0.0487394	-0.0802602	0.96568
Acc11594.1	0.023889	0.402438	0.999954	-0.118237	NA	-0.0805587	NA
Acc11595.1	46.1575	-0.245004	0.999954	0.341352	0.378798	-0.218298	0.527331
Acc11596.1	564.124	0.303032	0.999954	0.317149	0.669868	-1.81468	4.73799e-05
Acc11597.1	2.08653	0.472647	0.999954	-0.535549	0.636223	-1.79916	0.128425
Acc11598.1	0.670627	-0.616869	0.999954	-0.718383	NA	-0.441234	NA
Acc11599.1	0.0129385	-0.365198	0.999954	-0.125544	NA	-0.0805587	NA
Acc11601.1	1.40132	0.257708	0.999954	-0.39188	0.87247	-0.801907	0.602549
Acc11603.1	3.45241	-0.218637	0.999954	1.6924	0.0647899	0.227568	0.884797
Acc11604.1	531.13	0.0514606	0.999954	0.0276711	0.871357	-0.0578397	0.583971
Acc11605.1	37.2601	0.367446	0.776921	0.598913	0.0291824	0.312661	0.131462
Acc11606.1	0.26981	0.396582	0.999954	1.90586	NA	1.00146	NA
Acc11607.1	150.911	0.0301129	0.999954	0.164343	0.464224	0.0415535	0.832729
Acc11608.1	75.7954	0.39852	0.985069	1.70059	6.13669e-06	0.496641	0.137027
Acc11609.1	20.8816	0.0850965	0.999954	0.978726	0.00796605	1.2476	0.000614832
Acc11610.1	200.489	-0.0698206	0.999954	-0.237063	0.0882216	-0.467754	3.43055e-06
Acc11611.1	67.8736	0.0719372	0.999954	-0.18465	0.647344	-0.70663	0.00484117
Acc11612.1	498.69	-0.0966562	0.999954	0.409447	0.206044	0.576015	0.010762
Acc11613.1	0.0136759	0.40853	0.999954	-0.126762	NA	-0.0805587	NA
Acc11614.1	65.1864	0.164334	0.999954	-0.646038	0.0245387	-0.810697	0.0014393
Acc11615.1	1.76812	0.167565	0.999954	-0.295838	0.827888	-1.36102	0.197741
Acc11616.1	58.3054	-0.0668491	0.999954	0.536528	0.0523941	-0.557645	0.0114172
Acc11617.1	5.42594	0.198705	0.999954	1.55223	0.00859877	0.667041	0.296845
Acc11618.1	152.163	-0.0679587	0.999954	-0.102625	0.674647	0.0309043	0.874813
Acc11619.1	0.146252	1.68128	0.999954	0.373951	NA	-0.0805591	NA
Acc11620.1	31.0013	-0.195539	0.999954	-0.122461	0.716524	-0.0784299	0.753717
Acc11621.1	209.186	-0.100003	0.999954	-0.32397	0.0358174	-0.588083	4.89287e-08
Acc11623.1	51.9059	0.134816	0.999954	-0.229803	0.565654	0.337454	0.20037
Acc11624.1	2.54096	0.683569	0.973443	-0.355158	0.779974	0.608712	0.555406
Acc11625.1	26.2534	0.276906	0.97966	-0.000136458	0.99984	-0.451721	0.0755059
Acc11626.1	110.619	0.0101218	0.999954	0.20952	0.187171	-0.0817571	0.531877
Acc11627.1	30.7739	0.112164	0.999954	0.337396	0.446156	0.93589	0.000290014
Acc11629.1	0.216034	-2.46812	0.999954	0.251017	NA	-0.0805598	NA
Acc11630.1	5.21613	0.00736987	0.999954	0.482879	0.824046	-0.441234	0.785671
Acc11631.1	85.2124	0.167143	0.999954	-0.559127	0.00816166	-0.761027	1.02279e-06
Acc11632.1	148.4	0.33412	0.97524	0.707479	0.0288853	0.659256	0.00939652
Acc11633.1	157.548	-0.259026	0.706943	-0.297081	0.0606367	-0.477686	1.82953e-05
Acc11634.1	0.872241	1.23086	0.999954	0.486045	0.846089	0.975242	0.360457
Acc11635.1	43.4197	-0.294019	0.979444	0.634864	0.017793	0.62899	0.012292
Acc11636.1	19.0069	0.44951	0.728476	0.22418	0.621194	-0.107118	0.777627
Acc11637.1	251.039	0.00622485	0.999954	0.145957	0.30897	0.210328	0.0322603
Acc11638.1	0.234788	1.23001	0.999954	0.0185874	NA	0.640786	NA
Acc11639.1	0.302642	0.212693	0.999954	-0.579823	NA	-0.801906	NA
Acc11640.1	1015.41	-0.0566211	0.999954	-0.505878	0.000854444	-0.618888	1.33763e-07
Acc11641.1	111.552	0.0352678	0.999954	0.373202	0.0227098	0.321926	0.010692
Acc11642.1	115.539	-0.150718	0.999954	0.0829132	0.674379	0.31416	0.00957495
Acc11643.1	9.90974	0.157537	0.999954	-0.115711	0.87721	0.0432524	0.965847
Acc11644.1	411.618	0.0904928	0.999954	0.0530963	0.797256	0.416515	0.000116493
Acc11645.1	37.5382	0.1062	0.999954	1.18063	0.00063931	0.626842	0.0531341
Acc11646.1	11.7425	-0.159676	0.999954	-0.502157	0.24057	-0.163286	0.696823
Acc11647.1	604.176	0.106147	0.999954	0.0921739	0.856482	-1.76036	1.76998e-12
Acc11648.1	16.9455	0.111289	0.999954	-0.67567	0.130552	-1.04064	7.33241e-05
Acc11649.1	49.426	0.141364	0.999954	0.085765	0.802495	0.206815	0.321662
Acc11650.1	178.781	0.151155	0.999954	-0.171987	0.537365	0.461817	0.00746024
Acc11651.1	53.2951	0.229486	0.999954	-0.314393	0.531853	-0.23317	0.559084
Acc11652.1	2.31395	-0.24088	0.999954	-0.915088	0.344969	1.82668	0.102018
Acc11653.1	29.6924	0.026938	0.999954	0.0154122	0.976317	0.0919242	0.765698
Acc11654.1	66.7405	0.100007	0.999954	-0.272648	0.295528	-0.630795	0.00101805
Acc11655.1	1365.21	-0.247968	0.999954	-0.638238	0.0405862	-0.560453	0.0197499
Acc11656.1	0.647591	-0.994245	0.999954	0.368629	NA	-1.66178	NA
Acc11657.1	136.82	0.0687628	0.999954	0.011828	0.960334	-0.0459015	0.75487
Acc11658.1	294.914	-0.0523269	0.999954	0.211357	0.275382	-0.128993	0.401915
Acc11659.1	96.5263	0.0420679	0.999954	0.222578	0.331148	-0.218677	0.191554
Acc11660.1	61.3052	0.0631138	0.999954	-0.017808	0.965606	0.711817	0.000176072
Acc11661.1	141.977	0.001905	0.999954	0.030555	0.899388	-0.450332	9.74816e-05
Acc11662.1	1.53226	1.21116	0.999954	0.364371	0.903571	-1.16258	0.609566
Acc11663.1	2.99155	0.184472	0.999954	0.401854	0.745668	1.29957	0.282323
Acc11664.1	0.404836	1.88701	0.971971	-1.33603	NA	-1.16294	NA
Acc11665.1	5.46376	0.543123	0.999954	1.25034	0.146482	2.14	0.000829203
Acc11666.1	237.828	0.368327	0.894541	-0.710963	0.0143506	-0.265249	0.296397
Acc11667.1	398.201	-0.266747	0.65235	0.0874647	0.664703	-0.178285	0.159865
Acc11668.1	13.3706	0.073985	0.999954	0.496806	0.320666	-0.355154	0.328939
Acc11669.1	211.52	0.0470066	0.999954	-0.37331	0.0662687	-0.368589	0.017746
Acc11670.1	0.134628	-0.288438	0.999954	0.199789	NA	-0.441231	NA
Acc11671.1	88.158	0.379023	0.999954	-0.229099	0.679041	-0.480241	0.171517
Acc11672.1	30.8736	-0.225934	0.999954	-0.37677	0.138552	-0.40046	0.0770845
Acc11674.1	0.133805	2.67114	0.999954	-0.140152	NA	0.280108	NA
Acc11675.1	0	NA	NA	NA	NA	NA	NA
Acc11676.1	0	NA	NA	NA	NA	NA	NA
Acc11677.1	0	NA	NA	NA	NA	NA	NA
Acc11678.1	38.196	-0.00128862	0.999954	0.0655804	0.852743	0.187403	0.389967
Acc11679.1	24.3211	0.239328	0.999954	0.282942	0.382389	-0.122123	0.649608
Acc11680.1	174.356	0.249151	0.887709	-0.389668	0.0518412	0.103435	0.576109
Acc11681.1	36.1212	0.0988203	0.999954	0.356507	0.126299	-0.156979	0.418031
Acc11682.1	164.215	0.0681587	0.999954	0.166938	0.450414	0.0646836	0.745014
Acc11683.1	178.678	0.088383	0.999954	-0.0211814	0.927741	-0.0471628	0.745313
Acc11684.1	32.2884	0.25033	0.999954	-0.454083	0.242191	-0.010443	0.977496
Acc11685.1	1.34342	0.513074	0.999954	2.14441	0.106472	-0.801907	0.62248
Acc11686.1	102.228	-0.218242	0.998598	0.137305	0.642228	-0.129118	0.536206
Acc11687.1	672.432	-0.140512	0.999954	0.389756	0.0602997	0.143286	0.427432
Acc11688.1	395.675	-0.134635	0.97524	-0.169745	0.219936	-0.201589	0.0381808
Acc11689.1	62.1374	0.135137	0.999954	0.112301	0.680552	0.0141571	0.958763
Acc11690.1	364.896	0.808916	0.953456	1.70025	0.272312	-0.413857	0.700362
Acc11691.1	90.0215	-0.151848	0.999954	0.0722611	0.805739	0.295078	0.0739258
Acc11692.1	147.55	-0.0932046	0.999954	0.0943098	0.663543	0.110218	0.47705
Acc11693.1	5.57614	0.600318	0.966669	0.00602546	0.995544	1.36312	0.0163053
Acc11694.1	259.868	-0.0878031	0.999954	-0.149786	0.321583	-0.391111	7.81696e-05
Acc11695.1	74.7489	0.176156	0.999954	0.651577	0.012948	1.21164	5.32003e-11
Acc11696.1	14.0633	-0.296334	0.997203	0.474761	0.289308	0.606105	0.0291546
Acc11697.1	150.912	-0.16808	0.817552	0.101045	0.513626	-0.054724	0.658306
Acc11699.1	113.008	0.126852	0.999954	-0.407504	0.0459069	-0.264406	0.131847
Acc11700.1	188.037	0.0547565	0.999954	-0.0259031	0.896714	0.00908277	0.955934
Acc11701.1	207.304	0.0106525	0.999954	-0.190787	0.140313	-0.0377564	0.773971
Acc11082.1	1.33134	-0.259008	0.999954	0.630631	0.672382	-0.801907	0.638445
Acc11084.1	66.4397	0.104104	0.999954	-0.0447902	0.897888	0.296681	0.130698
Acc11085.1	58.5552	-0.0629393	0.999954	0.350385	0.147709	-0.138412	0.524618
Acc11086.1	111.949	-0.0960325	0.999954	-0.198626	0.217614	-0.252904	0.0334498
Acc11087.1	544.747	-0.14167	0.999954	0.62291	0.0120591	0.741723	7.49052e-05
Acc11088.1	101.689	0.0246222	0.999954	-0.00529493	0.986322	0.382772	0.00378885
Acc11090.1	1924.18	0.0299556	0.999954	0.261282	0.507262	-0.0863316	0.79418
Acc11091.1	133.638	0.224915	0.953456	0.0418745	0.881776	0.219168	0.169691
Acc11092.1	71.4471	0.175666	0.999954	-0.00951692	0.977246	-0.300183	0.0535515
Acc11093.1	100.484	0.0205808	0.999954	0.134777	0.614952	0.135808	0.470703
Acc11094.1	1.79976	-0.590385	0.999954	0.514363	0.661026	0.786423	0.520553
Acc11095.1	73.6873	-0.29842	0.999954	-0.564963	0.187571	-0.579327	0.095299
Acc11096.1	31.3397	0.836719	0.999954	-2.90001	7.04003e-06	-1.56748	4.10792e-05
Acc11097.1	69.7704	-0.296058	0.999954	0.0072185	0.989121	0.531246	0.010734
Acc11098.1	46.266	0.09325	0.999954	0.410662	0.122661	-0.0169956	0.95242
Acc11099.1	498.236	-0.0204973	0.999954	-0.174471	0.0863196	-0.122874	0.122954
Acc11043.1	196.048	0.174266	0.999954	0.0161149	0.963809	-0.0166451	0.951537
Acc11044.1	106.491	-0.0603708	0.999954	0.245327	0.408499	-0.0226437	0.937511
Acc11045.1	34.6288	-0.13899	0.999954	0.674051	0.0142691	0.835686	1.7192e-05
Acc11046.1	24.1978	0.317213	0.901936	0.607546	0.034501	0.512895	0.0216083
Acc11047.1	5.34605	-0.635225	0.999954	-0.0640336	0.953141	1.68248	0.000242822
Acc11048.1	185.144	0.0987505	0.999954	0.32533	0.0300995	0.478779	1.04422e-05
Acc11049.1	57.8706	0.102813	0.999954	0.0582749	0.863557	-0.400195	0.0646549
Acc11050.1	269.86	0.0447496	0.999954	0.271112	0.187571	0.237544	0.131847
Acc11051.1	1.08033	0.610953	0.999954	0.512544	0.785405	1.33442	0.345822
Acc11052.1	1.34879	-0.00210306	0.999954	1.01634	0.614051	-0.0805601	0.96568
Acc11053.1	0.179314	0.403568	0.999954	0.962201	NA	0.280111	NA
Acc11054.1	4.31503	0.0565888	0.999954	-0.473399	0.561707	0.318718	0.765878
Acc11055.1	1.03376	0.0509483	0.999954	1.61568	0.321579	-0.0805601	0.96568
Acc11056.1	0.996157	0.194089	0.999954	0.277461	0.860486	-0.0805601	0.96568
Acc11057.1	1.23787	-0.39946	0.999954	-1.01002	0.453684	1.21526	0.353277
Acc11058.1	16.6243	0.029065	0.999954	0.384412	0.466777	1.8119	3.39202e-06
Acc11059.1	122.345	-0.117553	0.999954	0.296125	0.234504	0.539013	0.00176632
Acc11061.1	71.0895	-0.0141163	0.999954	-0.0408187	0.928065	-0.107154	0.701236
Acc11062.1	4.44757	0.227662	0.999954	0.578952	0.572039	-0.380137	0.71008
Acc11063.1	106.831	-0.0663236	0.999954	0.138244	0.499445	-0.18921	0.1939
Acc11064.1	129.751	0.0818239	0.999954	-0.195356	0.543216	-0.590737	0.00275164
Acc11065.1	339.305	-0.300635	0.970438	0.00259917	0.995931	-0.502227	0.0188202
Acc11066.1	0	NA	NA	NA	NA	NA	NA
Acc11067.1	0.0525365	-0.679564	0.999954	-0.118233	NA	-0.0805587	NA
Acc11068.1	31.869	-0.237473	0.998598	0.211178	0.451526	-0.100788	0.681908
Acc11069.1	86.3528	0.0713167	0.999954	0.16071	0.560866	0.701874	2.01127e-05
Acc11070.1	124.782	0.0301178	0.999954	-0.311335	0.313755	-0.796736	8.40716e-05
Acc11071.1	126.15	0.0505213	0.999954	-0.212738	0.298222	-0.396526	0.00621863
Acc11072.1	274.102	-0.00022499	0.999954	-0.404752	0.0291198	-0.824407	9.90141e-10
Acc11073.1	462.122	-0.222685	0.626808	-0.140238	0.323714	-0.00912833	0.953578
Acc11074.1	0.349707	-0.0543925	0.999954	-0.130968	NA	1.36143	NA
Acc11075.1	8.12747	0.0905536	0.999954	-0.9006	0.121412	0.145702	0.791437
Acc11076.1	129.012	0.208051	0.758323	0.269381	0.0640345	0.236054	0.0372884
Acc11077.1	217.696	0.0749275	0.999954	0.0202368	0.938907	-0.194978	0.148036
Acc11078.1	40.6974	-0.47848	0.970438	-0.947874	0.0276224	-1.96812	4.03288e-10
Acc11079.1	150.173	0.0387595	0.999954	-0.160908	0.28567	0.221266	0.0414734
Acc11080.1	0.0433701	-0.00452955	0.999954	-0.125548	NA	0.280108	NA
Acc11102.1	29.2403	-0.207908	0.999954	-0.207814	0.470149	-0.2066	0.315097
Acc11103.1	12.6689	0.460528	0.974026	-0.184437	0.744832	-0.349479	0.331727
Acc11104.1	100.601	0.0420702	0.999954	0.1266	0.556606	-0.0748029	0.653388
Acc11105.1	77.1683	-0.0962414	0.999954	0.0952844	0.743515	0.213928	0.250526
Acc11106.1	208.647	-0.292759	0.574383	0.243696	0.143509	-0.293022	0.0138167
Acc11107.1	5.64333	-0.325281	0.999954	0.0127876	0.99003	0.265405	0.623919
Acc11108.1	9.66862	-0.119192	0.999954	0.153996	0.815462	-0.146018	0.736398
Acc11109.1	1.54997	-0.312797	0.999954	-1.00678	0.476371	1.56815	0.16824
Acc11110.1	330.853	-0.138137	0.938626	0.297249	0.0126083	0.112847	0.29369
Acc11111.1	49.0444	0.224767	0.999954	0.330476	0.332003	0.401759	0.0894059
Acc11112.1	640.907	-0.112203	0.999954	0.0518372	0.804529	-0.298156	0.00876435
Acc11113.1	373.299	0.0313497	0.999954	0.25613	0.327976	0.782901	3.00733e-06
Acc11114.1	210.43	-0.0959696	0.999954	-0.638848	0.0201798	-0.892242	9.11082e-06
Acc11115.1	74.9615	-0.22922	0.886248	0.388014	0.0398983	0.140447	0.373555
Acc11116.1	932.183	0.0123037	0.999954	0.232282	0.243383	0.573303	1.56262e-05
Acc11702.1	0.709727	-0.199464	0.999954	0.641514	0.744961	1.0508	0.457199
Acc11703.1	1306.79	0.199624	0.999954	-0.0552725	0.867312	0.471839	0.00592017
Acc11704.1	70.3219	-0.0685024	0.999954	-0.00858127	0.978612	-0.0375634	0.855801
Acc11705.1	138.36	0.136171	0.999954	-0.00273225	0.995193	0.696769	0.000122895
Acc11706.1	86.9126	-0.088012	0.999954	0.0854717	0.736262	0.398382	0.00415791
Acc11707.1	113.4	0.00552445	0.999954	0.083336	0.763036	-0.359064	0.0197804
Acc11708.1	197.938	-0.148722	0.999954	-0.431841	0.00739817	-0.459104	0.000200896
Acc11709.1	2.24018	-0.351568	0.999954	-0.66088	0.585572	-0.963137	0.227983
Acc11710.1	56.5118	0.00567326	0.999954	0.302246	0.126789	0.369219	0.0117226
Acc11711.1	0.263711	1.67306	0.999954	-0.120077	NA	-0.0805593	NA
Acc11712.1	565.456	-0.0308319	0.999954	-0.294047	0.0150342	-0.332961	0.000258148
Acc11713.1	112.369	0.105392	0.999954	-0.488486	0.0213909	0.0278581	0.904608
Acc11714.1	13.6286	0.591713	0.999954	0.265295	0.824909	-1.54621	0.181368
Acc11715.1	170.038	0.0943569	0.999954	0.268055	0.121797	0.460701	0.000580473
Acc11716.1	156.513	-0.0255145	0.999954	0.0539892	0.775799	0.141929	0.209985
Acc11717.1	21.8907	0.125266	0.999954	0.727806	0.0742376	0.746579	0.0124495
Acc11718.1	10.2655	0.0343098	0.999954	1.01365	0.0711271	0.443603	0.446867
Acc11719.1	14.7692	-0.0303157	0.999954	0.784513	0.0990968	0.64084	0.0726736
Acc11720.1	1982.27	-0.0483542	0.999954	0.0290935	0.945551	-0.16468	0.488148
Acc11721.1	156.985	-0.0400764	0.999954	0.314301	0.374768	0.683998	0.00445378
Acc11722.1	180.278	-0.0481333	0.999954	0.127806	0.440952	0.440812	5.19642e-06
Acc11723.1	35.4417	0.300403	0.934504	1.13267	0.000103365	1.07614	2.83799e-05
Acc11724.1	30.0226	0.109226	0.999954	0.752363	0.00631067	0.852852	3.59528e-05
Acc11725.1	1.63286	0.212845	0.999954	-1.38788	0.288386	-0.0805601	0.96568
Acc11726.1	120.77	-0.28775	0.797382	-0.345494	0.0824495	-0.656744	4.77871e-06
Acc11727.1	0.746311	0.936949	0.999954	0.255685	0.938533	-0.0805601	0.968221
Acc11729.1	33.0879	0.113444	0.999954	-1.47464	3.27304e-07	-0.725088	0.00338966
Acc11730.1	161.001	-0.141106	0.999954	-0.468258	0.000537178	0.161621	0.179965
Acc11731.1	11.7266	-0.286871	0.999954	-0.646015	0.410327	-1.08491	0.0282825
Acc11732.1	58.1177	-0.395612	0.354137	0.125159	0.570853	-0.22943	0.124138
Acc11733.1	10.9179	-0.102054	0.999954	-0.148361	0.771344	-0.326712	0.42511
Acc11734.1	29.8072	0.113663	0.999954	0.63345	0.0181536	0.183039	0.4508
Acc11735.1	850.779	0.149018	0.887709	0.202426	0.104766	0.0685988	0.535732
Acc11737.1	25.5365	-0.148575	0.999954	0.361959	0.189868	0.371607	0.0858274
Acc11738.1	0.653315	-0.959366	0.999954	1.10589	NA	-0.455816	NA
Acc11740.1	51.8307	-0.000716263	0.999954	0.0347051	0.910844	0.0124926	0.960829
Acc11741.1	104.447	-0.0590733	0.999954	0.0811974	0.669868	-0.021969	0.890956
Acc11742.1	0	NA	NA	NA	NA	NA	NA
Acc11743.1	0.0267036	0.0137464	0.999954	0.570203	NA	-0.0805587	NA
Acc11744.1	49.448	-0.166446	0.999954	-0.163149	0.576467	-0.699061	9.72876e-06
Acc11745.1	8.95106	0.696679	0.724712	0.134419	0.883265	0.972718	0.0997231
Acc11746.1	8.37377	-0.0523339	0.999954	0.253029	0.824891	-0.140885	0.851104
Acc11747.1	451.483	-0.185653	0.989651	0.126675	0.577523	-0.20636	0.167979
Acc11748.1	215.687	0.578146	0.830739	0.721368	0.0992909	0.210967	0.596527
Acc11749.1	41.5432	0.174183	0.999954	0.415172	0.104307	0.28688	0.127982
Acc11750.1	144.55	0.0822333	0.999954	-0.199823	0.103919	-0.00168598	0.989094
Acc11751.1	75.9063	0.451419	0.731829	-0.603255	0.0374177	-0.309136	0.205849
Acc11752.1	44.3475	0.464158	0.82963	0.175229	0.699708	0.271062	0.423277
Acc11753.1	0.660472	0.353876	0.999954	1.10796	NA	1.18834	NA
Acc11754.1	686.529	0.129657	0.999954	-0.832959	0.00331787	-0.963642	9.31867e-06
Acc11756.1	16.3202	0.137707	0.999954	0.573482	0.322667	1.0295	0.00704948
Acc11757.1	44.0938	0.224372	0.985069	0.212682	0.446803	0.172247	0.398855
Acc11758.1	227.483	0.162944	0.968072	0.101848	0.600406	-0.280331	0.0255818
Acc11759.1	0.144809	0.00762976	0.999954	-0.142568	NA	0.280108	NA
Acc11761.1	81.4464	0.04365	0.999954	0.179478	0.649164	-0.211382	0.439519
Acc11762.1	166.078	0.108197	0.999954	0.481048	0.0579906	0.776491	2.11269e-05
Acc11763.1	50.1163	0.210998	0.999954	0.0316315	0.958012	-0.0735095	0.861853
Acc11764.1	4.23119	0.48308	0.999954	-0.849293	0.383082	-0.924881	0.453462
Acc11765.1	0	NA	NA	NA	NA	NA	NA
Acc11766.1	2.97607	-0.692375	0.998271	-1.61911	0.0415578	0.490812	0.60948
Acc11768.1	142.35	0.064838	0.999954	0.47147	0.00313954	0.663406	2.13157e-07
Acc11769.1	351.517	0.0169485	0.999954	-0.266856	0.0174139	-0.553968	2.81557e-11
Acc11770.1	0.0583983	0.0259318	0.999954	0.192474	NA	0.280108	NA
Acc11771.1	152.311	0.143332	0.971039	0.0113276	0.9621	-0.157178	0.190391
Acc11772.1	0	NA	NA	NA	NA	NA	NA
Acc11774.1	21072.3	-0.429878	0.999954	-0.858398	0.233312	-0.648093	0.240497
Acc11775.1	62.3376	-0.0119892	0.999954	-0.0590712	0.840808	-0.133386	0.510875
Acc11778.1	64.75	0.0480496	0.999954	0.469495	0.317084	0.692793	0.0307263
Acc11779.1	35.4414	-0.311114	0.999954	-2.11298	1.59359e-08	-2.86644	3.80597e-18
Acc11780.1	41.9805	-0.0324669	0.999954	-0.175159	0.71041	-1.1656	3.86212e-06
Acc11781.1	69.0963	-0.233284	0.999954	-1.43037	0.00254558	-2.83225	7.73626e-16
Acc11782.1	3166.7	-0.0642871	0.999954	0.172067	0.356523	0.454382	0.000156564
Acc11783.1	27.7217	-0.26429	0.999954	-0.451005	0.185901	-0.112922	0.735401
Acc11784.1	51.9648	0.275497	0.999954	0.0473273	0.924583	0.27207	0.256687
Acc11785.1	0	NA	NA	NA	NA	NA	NA
Acc11786.1	147.318	0.0395175	0.999954	-0.151104	0.51805	-0.572366	0.000205647
Acc11787.1	2.16868	0.288179	0.999954	-0.0972706	0.944968	1.51168	0.134079
Acc11788.1	2.65839	0.605131	0.999954	-0.624421	0.533864	-0.0805601	0.96568
Acc11789.1	2.30155	-0.172853	0.999954	1.77257	0.22455	0.388634	0.638558
Acc11790.1	44.5277	0.104881	0.999954	-0.0234978	0.93795	-0.39755	0.00769006
Acc11791.1	31.0359	0.158551	0.999954	0.395921	0.190964	0.023819	0.946353
Acc11792.1	20.7807	0.240633	0.999954	0.365307	0.469645	0.888899	0.0129403
Acc11793.1	151.544	-0.168073	0.999954	-0.213674	0.354394	0.44604	0.00410696
Acc11794.1	98.0167	0.25023	0.948476	-0.635277	0.000954481	-0.627053	1.93887e-05
Acc11795.1	0.247162	0.869593	0.999954	-0.159015	NA	-0.08056	NA
Acc11796.1	470.864	-0.0428369	0.999954	0.045574	0.821794	-0.288313	0.00704548
Acc11797.1	0.517413	-0.554202	0.999954	-0.558062	NA	-0.0805601	NA
Acc11798.1	51.7578	0.123721	0.999954	0.0109223	0.972614	-0.127885	0.450681
Acc11799.1	146.248	-0.0632409	0.999954	-0.332673	0.28572	-0.896951	2.29825e-05
Acc11800.1	2.78689	0.354053	0.999954	0.20223	0.912596	-1.03223	0.50515
Acc11801.1	0	NA	NA	NA	NA	NA	NA
Acc11802.1	0	NA	NA	NA	NA	NA	NA
Acc11803.1	384.772	0.120895	0.999954	-0.138204	0.43413	-0.232751	0.0539616
Acc11804.1	47.0081	0.168847	0.999954	-0.283988	0.46404	0.255593	0.386116	AT1G27320.1	Histidine kinase 3 (AtHK3) (similar to)	HK
Acc11805.1	140.946	0.0245691	0.999954	-0.0825843	0.790724	0.358085	0.040206	AT1G27320.1	Histidine kinase 3 (AtHK3) (similar to)	HK
Acc11806.1	19.0353	-0.121588	0.999954	0.207099	0.67789	0.222347	0.711957
Acc11807.1	11.9115	-0.0472192	0.999954	-1.14291	0.0418046	-0.222022	0.829872
Acc11808.1	240.125	0.0602949	0.999954	0.0467043	0.818294	0.320543	0.00389992
Acc11809.1	137.136	0.0975316	0.999954	-0.219014	0.113343	-0.453992	8.1957e-06
Acc11810.1	1.38013	1.11676	0.894541	1.46013	0.415216	-2.25473	0.0167556
Acc11811.1	113.196	-0.228123	0.970437	-0.180811	0.481708	-0.194297	0.263093
Acc11812.1	461.621	-0.0903078	0.999954	-0.128128	0.321579	-0.107223	0.268848
Acc11813.1	131.88	-0.0407438	0.999954	0.363497	0.0955927	0.362378	0.0272757
Acc11814.1	110.696	0.0242467	0.999954	0.821064	0.00232939	0.575832	0.00771853
Acc11815.1	0	NA	NA	NA	NA	NA	NA
Acc11816.1	61.9493	0.241811	0.999954	1.16438	0.00290422	-0.254827	0.559394
Acc11817.1	9.30935	0.288096	0.999954	0.503133	0.291254	0.244666	0.542317
Acc11818.1	861.9	0.0517594	0.999954	0.0333329	0.781576	0.107077	0.133319
Acc11819.1	74.9109	0.429303	0.709043	-0.00158798	0.99719	-0.0987568	0.739746
Acc11820.1	5.6639	0.593602	0.858053	1.14317	0.0882216	0.351549	0.515123
Acc11821.1	31.0253	0.0777132	0.999954	0.578262	0.0604441	0.127368	0.721733
Acc11822.1	178.026	-0.0763802	0.999954	0.184035	0.281568	0.0385322	0.804333
Acc11823.1	0.14185	0.439706	0.999954	0.550932	NA	-0.44123	NA
Acc11824.1	171.909	0.185088	0.999954	0.428904	0.200742	0.590665	0.0130503
Acc11825.1	68.4057	0.0393048	0.999954	0.189922	0.476371	-0.00386649	0.984533
Acc11826.1	1.53152	0.263904	0.999954	-0.555041	0.750847	-0.0796922	0.96568
Acc11827.1	0	NA	NA	NA	NA	NA	NA
Acc11828.1	6.75085	-0.565772	0.999954	-0.304239	0.728601	-0.605856	0.415693
Acc11829.1	309.548	-0.0257763	0.999954	-0.0801939	0.520061	0.131908	0.118416
Acc11830.1	0.476327	-0.402375	0.999954	0.960124	NA	-0.0805601	NA
Acc11831.1	96.0172	-0.27593	0.999954	-0.0622877	0.901843	-0.076258	0.818238
Acc11833.1	219.245	0.261626	0.620853	-0.309024	0.0140453	0.211049	0.0308212
Acc11834.1	786.189	0.0561105	0.999954	-0.147983	0.511665	0.261437	0.0767784
Acc11835.1	0.0531727	0.467016	0.999954	-0.136514	NA	-0.0805587	NA
Acc11836.1	42.9787	0.109843	0.999954	0.571704	0.191009	0.536876	0.0940166
Acc11837.1	220.673	0.142738	0.999954	0.0306302	0.937755	0.31189	0.107581
Acc11838.1	7.57115	0.40774	0.999954	0.169442	0.82316	-0.559154	0.105034
Acc11839.1	0.0664307	-0.272596	0.999954	-0.110923	NA	-0.0805587	NA
Acc11840.1	4.93508	0.0744708	0.999954	-1.83854	0.0211913	-1.27902	0.0342079
Acc11842.1	6.88576	-0.145168	0.999954	1.87266	0.0561205	-0.441234	0.785215
Acc11843.1	77.8869	0.365754	0.998598	0.329038	0.462044	0.419978	0.162662
Acc11844.1	503.849	0.028513	0.999954	0.0189811	0.936876	0.111051	0.381
Acc11845.1	47.3969	0.171234	0.999954	0.450155	0.238311	0.940056	0.000228247
Acc11846.1	220.164	-0.0367293	0.999954	-0.0237965	0.893486	0.164143	0.08799
Acc11847.1	1.65884	0.136975	0.999954	-0.818079	0.588209	-0.622924	0.644062
Acc11848.1	4.97232	-0.105503	0.999954	0.389445	0.63646	-0.253099	0.758669
Acc11849.1	0.967769	-0.215136	0.999954	0.645864	0.727276	1.99008	0.112604
Acc11850.1	25.8424	0.238966	0.999954	0.157073	0.743723	0.721193	0.0370248
Acc11851.1	82.4941	0.0491384	0.999954	0.305903	0.0816933	0.136922	0.382461
Acc11852.1	119.076	-0.0834652	0.999954	0.00803618	0.972626	0.10135	0.390136
Acc11853.1	0.234475	-0.704901	0.999954	-1.24324	NA	-0.08056	NA
Acc11854.1	0	NA	NA	NA	NA	NA	NA
Acc11857.1	266.355	-0.171358	0.969388	0.167574	0.365365	0.106246	0.461691
Acc11858.1	182.22	-0.0900788	0.999954	0.226416	0.14775	0.124943	0.300085
Acc11859.1	33.489	-0.0196312	0.999954	0.181907	0.735204	0.843508	0.00532248
Acc11860.1	121.616	0.257329	0.908823	-0.342217	0.139681	-0.62692	0.000130465
Acc11862.1	67.1109	0.068813	0.999954	0.100075	0.725427	0.389664	0.0140486
Acc11863.1	39.6545	-0.020357	0.999954	0.233778	0.364103	-0.0012615	0.995013
Acc11864.1	124.922	-0.029001	0.999954	0.457874	0.0370489	-0.033247	0.889958
Acc11865.1	462.374	-0.021143	0.999954	0.204712	0.217493	0.705796	3.34623e-10
Acc11866.1	258.532	-0.0559731	0.999954	0.0495245	0.818719	-0.409358	0.000253105
Acc11867.1	87.8502	0.23054	0.999954	0.651905	0.0865039	0.899778	0.00172281
Acc11868.1	0.928342	-0.218336	0.999954	-0.813808	0.610596	0.280113	0.877928
Acc11869.1	282.374	0.091804	0.999954	-0.0366487	0.815479	0.368833	5.91304e-06
Acc11870.1	0.625264	0.786428	0.999954	2.76942	NA	0.999682	NA	AT4G35190.1	Cytokinin riboside 5'-monophosphate phosphoribohydrolase LOG5 (similar to)	LOG	LOG5.1
Acc11871.1	0.0802121	0.170926	0.999954	-0.154787	NA	-0.0805587	NA
Acc11872.1	2.12657	0.761783	0.969531	1.07242	0.392471	-0.348175	0.808287
Acc11873.1	26.5669	-0.227288	0.999954	0.332339	0.34428	-0.21576	0.413792
Acc11874.1	63.3521	0.168727	0.999954	-0.571338	0.202764	-0.0292621	0.958117
Acc11875.1	17.6721	0.487736	0.886248	0.5567	0.203243	0.446744	0.174575
Acc11876.1	143.587	0.183878	0.999954	0.633875	0.195176	-1.88044	7.34451e-07
Acc11877.1	963.438	-0.0422384	0.999954	-0.180661	0.0390096	0.0776296	0.295277
Acc11878.1	103.957	-0.246956	0.887709	-0.0555047	0.842323	0.10583	0.554276
Acc11879.1	100.387	-0.0266024	0.999954	-0.181735	0.42432	-0.070323	0.709381
Acc11880.1	29.9914	-0.0155284	0.999954	-0.209893	0.516455	0.344477	0.111403
[truncated: 31,046 more rows]
